# Supplementary material for: Portable two-filter dual-flow-loop &lt;sup&gt;222&lt;/sup&gt;Rn detector: stand-alone monitor and calibration transfer device
Source: Copernicus journal article supplement (doi:10.5194/adgeo-57-63-2022), 2022-05-18
Supplement: Supplementary file 1 [file adgeo-57-63-2022-supplement.zip]

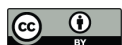

*Supplement of*

## **Portable two-filter dual-flow-loop $^{222}\text{Rn}$ detector: stand-alone monitor and calibration transfer device**

**Scott D. Chambers et al.**

*Correspondence to:* Scott D. Chambers (sdc@ansto.gov.au)

- [adgeo-57-63-2022-supplement-title-page.pdf](#)
- [Chambers\\_etal\\_ADGEO\\_2022\\_3\\_Source\\_Data.xlsx](#)

The copyright of individual parts of the supplement might differ from the article licence.
