# Supplementary material for: Portable two-filter dual-flow-loop &lt;sup&gt;222&lt;/sup&gt;Rn detector: stand-alone monitor and calibration transfer device
Source: Copernicus journal article supplement (doi:10.5194/adgeo-57-63-2022), 2022-05-18
Supplement: Supplementary file 1 [file Chambers_etal_ADGEO_2022_3_Source_Data.xlsx]

## Sheet: Rn Detector Intercomparison
Timestamp information						Data from the 1500 L radon detector												Data from the 200 L radon detector
Year	DayOfYear	Month	DOM	Hour		ExFlow	InFlow	HV	LLD	AirT	RH	Pressure	Ind	BG_1500L	Cal_Coef	Rn_1500		ExFlow	InFlow	HV	LLD	AirT	RH	Pressure	Ind	BG_200L	Cal_coef	Rn_200
2020	307.5	11	2	12:00:00		61.43	9.54	663	268	23.908	46.3	990.254	1	75	0.2807	0.38198		14.67	10.65	755.2	88	26.51	39.06	1008.34	1	31	0.0385	0.82251
2020	307.521	11	2	12:30:00		61.43	9.54	663	249	24.02	45.67	990.014	1	75	0.2807	0.34438		14.61	10.65	755.2	66	26.54	38.67	1008.05	1	31	0.0385	0.50505
2020	307.542	11	2	13:00:00		61.43	9.55	663	254	24.076	45.73	989.887	1	75	0.2807	0.35427		14.67	10.65	755.2	51	26.57	38.63	1007.89	1	31	0.0385	0.2886
2020	307.562	11	2	13:30:00		61.23	9.55	663	224	24.062	46.62	989.799	1	75	0.2807	0.2949		14.14	10.65	755.3	66	26.57	39.25	1007.71	1	31	0.0385	0.50505
2020	307.583	11	2	14:00:00		61.23	9.55	663	220	24.006	46.67	989.738	1	75	0.2807	0.28698		14.14	10.65	755.2	52	26.57	39.29	1007.62	1	31	0.0385	0.30303
2020	307.604	11	2	14:30:00		61.23	9.55	663	205	23.936	46.71	989.54	1	75	0.2807	0.25729		14.14	10.65	755.2	46	26.54	39.31	1007.37	1	31	0.0385	0.21645
2020	307.625	11	2	15:00:00		61.3	9.55	663	195	23.908	46.01	989.401	1	75	0.2807	0.2375		14.21	10.65	755.2	47	26.52	38.79	1007.2	1	31	0.0385	0.23088
2020	307.646	11	2	15:30:00		61.3	9.56	663	202	23.768	45.35	989.265	1	75	0.2807	0.25136		14.14	10.64	755.2	62	26.48	38.19	1007.08	1	31	0.0385	0.44733
2020	307.667	11	2	16:00:00		61.36	9.55	663	177	23.642	45.04	989.048	1	75	0.2807	0.20188		14.14	10.64	755.2	43	26.42	37.77	1006.73	1	31	0.0385	0.17316
2020	307.688	11	2	16:30:00		61.5	9.56	663	202	23.572	44.81	989.1	1	75	0.2807	0.25136		14.21	10.64	755.2	58	26.36	37.49	1006.79	1	31	0.0385	0.38961
2020	307.708	11	2	17:00:00		61.5	9.56	663	203	23.572	45.3	989.055	1	75	0.2807	0.25333		14.21	10.64	755.2	47	26.35	37.73	1006.73	1	31	0.0385	0.23088
2020	307.729	11	2	17:30:00		61.5	9.56	663	176	23.614	45.75	989.123	1	75	0.2807	0.1999		14.21	10.62	755.2	42	26.3	38.08	1006.81	1	31	0.0385	0.15873
2020	307.75	11	2	18:00:00		61.56	9.56	663	181	23.6	45.72	989.096	1	75	0.2807	0.20979		14.27	10.62	755.2	40	26.28	38.18	1006.8	1	31	0.0385	0.12987
2020	307.771	11	2	18:30:00		61.56	9.56	663	199	23.586	45.31	989.068	1	75	0.2807	0.24542		14.21	10.62	755.2	45	26.26	37.95	1006.78	1	31	0.0385	0.20202
2020	307.792	11	2	19:00:00		61.63	9.56	663	207	23.572	45.48	989.164	1	75	0.2807	0.26125		14.21	10.63	755.3	44	26.26	38.01	1006.86	1	31	0.0385	0.18759
2020	307.812	11	2	19:30:00		61.7	9.56	663	199	23.586	46.06	989.203	1	75	0.2807	0.24542		14.27	10.62	755.2	46	26.22	38.44	1006.93	1	31	0.0385	0.21645
2020	307.833	11	2	20:00:00		61.76	9.56	663	187	23.614	46.8	989.295	1	75	0.2807	0.22167		14.27	10.62	755.2	53	26.21	39	1007.07	1	31	0.0385	0.31746
2020	307.854	11	2	20:30:00		61.83	9.56	663	189	23.628	46.76	989.583	1	75	0.2807	0.22563		14.27	10.62	755.2	51	26.21	39.16	1007.38	1	31	0.0385	0.2886
2020	307.875	11	2	21:00:00		61.83	9.57	663	206	23.628	46.42	989.698	1	75	0.2807	0.25927		14.27	10.64	755.2	50	26.22	38.99	1007.56	1	31	0.0385	0.27417
2020	307.896	11	2	21:30:00		61.9	9.57	663	250	23.656	45.98	989.906	1	75	0.2807	0.34636		14.27	10.64	755.2	53	26.22	38.73	1007.84	1	31	0.0385	0.31746
2020	307.917	11	2	22:00:00		61.9	9.57	663	264	23.698	45.6	990.019	1	75	0.2807	0.37406		14.34	10.62	755.2	43	26.22	38.48	1008	1	31	0.0385	0.17316
2020	307.938	11	2	22:30:00		61.9	9.57	663	271	23.684	45.3	990.085	1	75	0.2807	0.38792		14.27	10.62	755.2	53	26.23	38.26	1008.07	1	31	0.0385	0.31746
2020	307.958	11	2	23:00:00		61.9	9.57	663	286	23.684	45.17	990.09	1	75	0.2807	0.41761		14.34	10.62	755.2	73	26.21	38.13	1008.1	1	31	0.0385	0.60606
2020	307.979	11	2	23:30:00		61.83	9.58	663	347	23.67	45.16	990.173	1	75	0.2807	0.53834		14.27	10.62	755.2	58	26.21	38.09	1008.19	1	31	0.0385	0.38961
2020	308	11	3	00:00:00		61.96	9.58	663	417	23.684	45.12	990.192	1	75	0.2807	0.67688		14.27	10.62	755.2	81	26.17	38.08	1008.22	1	31	0.0385	0.7215
2020	308.021	11	3	00:30:00		61.96	9.57	663	471	23.642	45.14	990.087	1	75	0.2807	0.78375		14.27	10.62	755.2	103	26.14	38.08	1008.11	1	31	0.0385	1.03896
2020	308.042	11	3	01:00:00		61.96	9.57	663	511	23.67	45.02	989.763	1	75	0.2807	0.86292		14.27	10.61	755.2	102	26.12	38.03	1007.72	1	31	0.0385	1.02453
2020	308.062	11	3	01:30:00		62.1	9.57	663	579	23.684	44.83	989.545	1	75	0.2807	0.99751		14.27	10.62	755.2	82	26.12	37.97	1007.43	1	31	0.0385	0.73593
2020	308.083	11	3	02:00:00		62.1	9.57	663	665	23.684	44.55	989.231	1	75	0.2807	1.16772		14.34	10.61	755.2	113	26.12	37.8	1007.05	1	31	0.0385	1.18326
2020	308.104	11	3	02:30:00		62.16	9.56	663	632	23.698	44.52	988.875	1	75	0.2807	1.1024		14.34	10.62	755.2	118	26.11	37.76	1006.59	1	31	0.0385	1.25541
2020	308.125	11	3	03:00:00		62.1	9.56	663	728	23.684	44.18	988.607	1	75	0.2807	1.2924		14.34	10.58	755.2	143	26.1	37.57	1006.21	1	31	0.0385	1.61616
2020	308.146	11	3	03:30:00		62.16	9.56	663	776	23.67	43.67	988.453	1	75	0.2807	1.3874		14.34	10.56	755.2	162	26.07	37.19	1005.97	1	31	0.0385	1.89033
2020	308.167	11	3	04:00:00		62.23	9.56	663	834	23.67	43.43	988.461	1	75	0.2807	1.5022		14.34	10.59	755.2	143	26.07	36.98	1005.98	1	31	0.0385	1.61616
2020	308.188	11	3	04:30:00		62.16	9.56	663	835	23.712	43.12	988.433	1	75	0.2807	1.50418		14.34	10.58	755.2	165	26.08	36.77	1005.97	1	31	0.0385	1.93362
2020	308.208	11	3	05:00:00		62.1	9.56	663	890	23.698	42.86	988.331	1	75	0.2807	1.61303		14.27	10.56	755.2	163	26.07	36.56	1005.86	1	31	0.0385	1.90476
2020	308.229	11	3	05:30:00		62.16	9.56	663	868	23.712	42.43	988.261	1	75	0.2807	1.56949		14.34	10.56	755.2	171	26.07	36.26	1005.73	1	31	0.0385	2.0202
2020	308.25	11	3	06:00:00		62.23	9.56	663	951	23.67	42.1	988.478	1	75	0.2807	1.73376		14.34	10.56	755.2	178	26.06	35.98	1005.97	1	31	0.0385	2.12121
2020	308.271	11	3	06:30:00		62.1	9.57	663	961	23.67	41.8	988.71	1	75	0.2807	1.75355		14.34	10.56	755.2	164	26.02	35.75	1006.29	1	31	0.0385	1.91919
2020	308.292	11	3	07:00:00		62.16	9.57	663	1009	23.838	42.18	988.918	1	75	0.2807	1.84855		14.34	10.56	755.2	153	26.07	36	1006.54	1	31	0.0385	1.76046
2020	308.312	11	3	07:30:00		62.1	9.57	663	941	24.076	42.97	989.005	1	75	0.2807	1.71397		14.34	10.61	755.3	164	26.26	36.71	1006.65	1	31	0.0385	1.91919
2020	308.333	11	3	08:00:00		61.96	9.57	663	909	24.384	43.32	989.203	1	75	0.2807	1.65064		14.27	10.64	755.3	156	26.53	37.23	1006.87	1	31	0.0385	1.80375
2020	308.354	11	3	08:30:00		62.03	9.57	663	810	24.692	43.09	989.447	1	75	0.2807	1.4547		14.27	10.71	755.3	149	26.85	37.28	1007.19	1	31	0.0385	1.70274
2020	308.375	11	3	09:00:00		61.96	9.56	663	691	24.16	44.02	989.51	1	75	0.2807	1.21917		14.41	10.71	755.3	114	26.76	37.34	1007.29	1	31	0.0385	1.19769
2020	308.396	11	3	09:30:00		61.9	9.58	663	549	24.286	43.81	989.6	1	75	0.2807	0.93813		14.27	10.67	755.3	78	26.68	37.32	1007.38	1	31	0.0385	0.67821
2020	308.417	11	3	10:00:00		61.96	9.57	663	440	24.16	43.39	989.632	1	75	0.2807	0.7224		14.27	10.67	755.3	97	26.72	36.8	1007.45	1	31	0.0385	0.95238
2020	308.438	11	3	10:30:00		61.96	9.58	663	371	24.356	42.29	989.508	1	75	0.2807	0.58584		14.34	10.66	755.3	74	26.73	36.19	1007.31	1	31	0.0385	0.62049
2020	308.458	11	3	11:00:00		62.03	9.56	663	360	24.272	41.69	989.277	1	75	0.2807	0.56407		14.34	10.69	755.2	63	26.81	35.54	1007.04	1	31	0.0385	0.46176
2020	308.479	11	3	11:30:00		62.03	9.57	663	314	24.44	40.19	989.034	1	75	0.2807	0.47302		14.27	10.67	755.2	47	26.78	34.63	1006.7	1	31	0.0385	0.23088
2020	308.5	11	3	12:00:00		62.03	9.56	663	245	24.09	40.03	988.667	1	75	0.2807	0.33646		14.41	10.65	755.2	46	26.61	34.09	1006.26	1	31	0.0385	0.21645
2020	308.521	11	3	12:30:00		62.03	9.56	663	261	24.482	39.08	988.419	1	75	0.2807	0.36813		14.27	10.65	755.2	100	26.75	33.67	1005.93	1	31	0.0385	0.99567
2020	308.542	11	3	13:00:00		61.96	9.55	663	243	24.034	40.3	988.037	1	75	0.2807	0.3325		14.34	10.65	755.2	56	26.65	33.9	1005.43	1	31	0.0385	0.36075
2020	308.562	11	3	13:30:00		61.96	9.55	663	240	24.384	40.86	987.718	1	75	0.2807	0.32656		14.34	10.65	755.2	54	26.75	34.56	1004.99	1	31	0.0385	0.33189
2020	308.583	11	3	14:00:00		61.96	9.54	663	231	23.964	42.27	987.511	1	75	0.2807	0.30875		14.34	10.65	755.2	52	26.65	35.26	1004.69	1	31	0.0385	0.30303
2020	308.604	11	3	14:30:00		62.03	9.54	663	267	24.146	42.47	987.313	1	75	0.2807	0.38		14.34	10.65	755.1	60	26.62	35.69	1004.48	1	31	0.0385	0.41847
2020	308.625	11	3	15:00:00		61.96	9.54	663	241	24.258	42.69	987.046	1	75	0.2807	0.32854		14.34	10.65	755.1	61	26.73	35.98	1004.14	1	31	0.0385	0.4329
2020	308.646	11	3	15:30:00		62.03	9.53	663	255	24.286	43.04	986.683	1	75	0.2807	0.35625		14.34	10.65	755.2	48	26.81	36.19	1003.69	1	31	0.0385	0.24531
2020	308.667	11	3	16:00:00		62.03	9.53	663	212	24.286	43.35	986.476	1	75	0.2807	0.27115		14.34	10.65	755.2	48	26.85	36.4	1003.38	1	31	0.0385	0.24531
2020	308.688	11	3	16:30:00		62.1	9.53	663	221	24.286	42.98	986.367	1	75	0.2807	0.28896		14.34	10.65	755.2	43	26.88	36.15	1003.24	1	31	0.0385	0.17316
2020	308.708	11	3	17:00:00		62.1	9.53	663	180	24.286	42.3	986.269	1	75	0.2807	0.20781		14.34	10.65	755.2	54	26.92	35.64	1003.11	1	31	0.0385	0.33189
2020	308.729	11	3	17:30:00		62.03	9.53	663	194	24.258	41.58	986.175	1	75	0.2807	0.23552		14.41	10.65	755.2	58	26.93	35.03	1002.97	1	31	0.0385	0.38961
2020	308.75	11	3	18:00:00		62.16	9.53	663	173	24.216	41.08	986.04	1	75	0.2807	0.19396		14.34	10.65	755.2	40	26.97	34.52	1002.78	1	31	0.0385	0.12987
2020	308.771	11	3	18:30:00		62.16	9.53	663	201	24.16	40.9	986.054	1	75	0.2807	0.24938		14.34	10.65	755.2	49	26.93	34.24	1002.76	1	31	0.0385	0.25974
2020	308.792	11	3	19:00:00		62.1	9.53	663	207	24.09	41.23	986.133	1	75	0.2807	0.26125		14.34	10.65	755.2	53	26.87	34.3	1002.85	1	31	0.0385	0.31746
2020	308.812	11	3	19:30:00		62.23	9.53	663	183	24.006	41.96	986.277	1	75	0.2807	0.21375		14.41	10.65	755.2	53	26.8	34.69	1003.06	1	31	0.0385	0.31746
2020	308.833	11	3	20:00:00		62.16	9.53	663	188	23.908	43.1	986.464	1	75	0.2807	0.22365		14.41	10.65	755.2	46	26.71	35.4	1003.32	1	31	0.0385	0.21645
2020	308.854	11	3	20:30:00		62.1	9.53	663	205	23.796	44.24	986.543	1	75	0.2807	0.25729		14.34	10.63	755.1	60	26.59	36.27	1003.46	1	31	0.0385	0.41847
2020	308.875	11	3	21:00:00		62.16	9.53	663	277	23.712	45.12	986.544	1	75	0.2807	0.39979		14.41	10.65	755.1	49	26.47	37.04	1003.46	1	31	0.0385	0.25974
2020	308.896	11	3	21:30:00		62.16	9.53	663	288	23.642	45.74	986.677	1	75	0.2807	0.42157		14.41	10.64	755.1	69	26.4	37.57	1003.61	1	31	0.0385	0.54834
2020	308.917	11	3	22:00:00		62.16	9.53	663	323	23.572	46.16	986.735	1	75	0.2807	0.49084		14.41	10.64	755.1	69	26.3	38.01	1003.74	1	31	0.0385	0.54834
2020	308.938	11	3	22:30:00		62.23	9.53	663	335	23.488	46.37	986.572	1	75	0.2807	0.51459		14.41	10.65	755.1	77	26.22	38.28	1003.55	1	31	0.0385	0.66378
2020	308.958	11	3	23:00:00		62.16	9.53	663	401	23.446	46.56	986.388	1	75	0.2807	0.64521		14.41	10.64	755.1	59	26.14	38.48	1003.3	1	31	0.0385	0.40404
2020	308.979	11	3	23:30:00		62.16	9.53	663	514	23.432	46.63	986.232	1	75	0.2807	0.86886		14.41	10.64	755.1	105	26.09	38.7	1003.1	1	31	0.0385	1.06782
2020	309	11	4	1900-01-01		62.16	9.53	663	604	23.46	46.59	986.114	1	75	0.2807	1.04699		14.34	10.63	755	128	26.09	38.79	1002.89	1	31	0.0385	1.39971
2020	309.021	11	4	1900-01-01 00:30:00		62.16	9.52	663	741	23.46	46.54	985.964	1	75	0.2807	1.31813		14.41	10.61	755	131	26.05	38.8	1002.74	1	31	0.0385	1.443
2020	309.042	11	4	1900-01-01 01:00:00		62.16	9.52	663	801	23.474	46.46	985.656	1	75	0.2807	1.43688		14.41	10.61	755	141	26.04	38.83	1002.37	1	31	0.0385	1.5873
2020	309.062	11	4	1900-01-01 01:30:00		62.16	9.52	663	936	23.572	45.97	985.368	1	75	0.2807	1.70407		14.41	10.58	755	175	26.06	38.64	1002	1	31	0.0385	2.07792
2020	309.083	11	4	1900-01-01 02:00:00		62.23	9.51	663	1038	23.572	45.74	984.877	1	75	0.2807	1.90595		14.41	10.56	755	169	26.08	38.47	1001.41	1	31	0.0385	1.99134
2020	309.104	11	4	1900-01-01 02:30:00		62.23	9.51	663	1152	23.572	45.42	984.489	1	75	0.2807	2.13158		14.34	10.57	755	194	26.09	38.25	1000.89	1	31	0.0385	2.35209
2020	309.125	11	4	1900-01-01 03:00:00		62.16	9.5	663	1149	23.6	45.12	984.167	1	75	0.2807	2.12564		14.41	10.56	755	211	26.09	38.06	1000.41	1	31	0.0385	2.5974
2020	309.146	11	4	1900-01-01 03:30:00		62.3	9.5	663	1163	23.558	45.12	984.001	1	75	0.2807	2.15335		14.41	10.56	755	183	26.05	38.01	1000.22	1	31	0.0385	2.19336
2020	309.167	11	4	1900-01-01 04:00:00		62.23	9.5	663	1068	23.614	45.09	983.778	1	75	0.2807	1.96532		14.41	10.56	755	169	26.04	38.03	999.93	1	31	0.0385	1.99134
2020	309.188	11	4	1900-01-01 04:30:00		62.23	9.5	663	1007	23.6	45.04	983.65	1	75	0.2807	1.84459		14.41	10.56	755	159	26.08	38.01	999.721	1	31	0.0385	1.84704
2020	309.208	11	4	1900-01-01 05:00:00		62.16	9.5	663	931	23.628	44.88	983.516	1	75	0.2807	1.69418		14.34	10.56	755.1	172	26.09	37.93	999.57	1	31	0.0385	2.03463
2020	309.229	11	4	1900-01-01 05:30:00		62.23	9.49	663	1032	23.628	44.64	983.35	1	75	0.2807	1.89407		14.41	10.56	755	193	26.08	37.79	999.36	1	31	0.0385	2.33766
2020	309.25	11	4	1900-01-01 06:00:00		62.3	9.49	663	1010	23.642	44.52	983.165	1	75	0.2807	1.85053		14.41	10.56	755.1	176	26.09	37.63	999.13	1	31	0.0385	2.09235
2020	309.271	11	4	1900-01-01 06:30:00		62.23	9.49	663	1015	23.642	44.6	983.085	1	75	0.2807	1.86043		14.41	10.56	755.1	171	26.08	37.68	998.968	1	31	0.0385	2.0202
2020	309.292	11	4	1900-01-01 07:00:00		62.16	9.49	663	1046	23.754	44.98	983.085	1	75	0.2807	1.92178		14.41	10.56	755.1	159	26.13	38	998.973	1	31	0.0385	1.84704
2020	309.312	11	4	1900-01-01 07:30:00		62.1	9.5	663	995	24.146	44.93	983.098	1	75	0.2807	1.82084		14.34	10.57	755	168	26.37	38.33	998.975	1	31	0.0385	1.97691
2020	309.333	11	4	1900-01-01 08:00:00		62.16	9.48	663	873	24.412	45.2	983.057	1	75	0.2807	1.57938		14.34	10.63	755.2	201	26.71	38.57	998.879	1	31	0.0385	2.4531
2020	309.354	11	4	1900-01-01 08:30:00		62.1	9.49	663	869	24.034	46.49	983.098	1	75	0.2807	1.57147		14.34	10.61	755.2	158	26.51	39.26	998.99	1	31	0.0385	1.83261
2020	309.375	11	4	1900-01-01 09:00:00		62.16	9.48	663	899	24.174	45.96	982.744	1	75	0.2807	1.63084		14.41	10.63	755.2	155	26.67	38.87	998.567	1	31	0.0385	1.78932
2020	309.396	11	4	1900-01-01 09:30:00		62.16	9.49	663	1054	24.356	45.75	982.53	1	75	0.2807	1.93762		14.34	10.63	755.5	210	26.83	38.84	998.348	1	31	0.0385	2.58297
2020	309.417	11	4	1900-01-01 10:00:00		62.03	9.48	663	1113	24.034	46.33	982.319	1	75	0.2807	2.05439		14.34	10.63	755.7	190	26.73	38.96	998.059	1	31	0.0385	2.29437
2020	309.438	11	4	1900-01-01 10:30:00		62.1	9.48	663	943	24.062	45.22	982.085	1	75	0.2807	1.71793		14.34	10.62	755.7	155	26.7	38.25	997.787	1	31	0.0385	1.78932
2020	309.458	11	4	1900-01-01 11:00:00		62.1	9.47	663	814	24.09	43.71	981.797	1	75	0.2807	1.46261		14.34	10.61	755.5	279	26.69	37.13	997.4	1	31	0.0385	3.57864
2020	309.479	11	4	1900-01-01 11:30:00		62.1	9.47	663	753	24.118	43.08	981.444	1	75	0.2807	1.34188		14.34	10.62	755.5	135	26.69	36.58	996.94	1	31	0.0385	1.50072
2020	309.5	11	4	1900-01-01 12:00:00		61.96	9.47	663	610	24.09	42.33	980.997	1	75	0.2807	1.05886		14.34	10.57	755.5	111	26.62	36.05	996.357	1	31	0.0385	1.1544
2020	309.521	11	4	1900-01-01 12:30:00		62.03	9.47	663	581	23.992	41.24	980.664	1	75	0.2807	1.00146		14.34	10.56	755.4	93	26.63	35.1	995.922	1	31	0.0385	0.89466
2020	309.542	11	4	1900-01-01 13:00:00		62.03	9.46	663	488	23.992	40.12	980.077	1	75	0.2807	0.8174		14.34	10.57	755.4	90	26.65	34.16	995.195	1	31	0.0385	0.85137
2020	309.562	11	4	1900-01-01 13:30:00		62.1	9.46	663	468	23.992	38.67	979.514	1	75	0.2807	0.77782		14.34	10.56	755.5	85	26.62	33.08	994.431	1	31	0.0385	0.77922
2020	309.583	11	4	1900-01-01 14:00:00		62.03	9.46	663	449	23.992	36.84	979.048	1	75	0.2807	0.74021		14.34	10.56	755.5	85	26.6	31.75	993.862	1	31	0.0385	0.77922
2020	309.604	11	4	1900-01-01 14:30:00		61.96	9.45	663	403	24.006	35.7	978.504	1	75	0.2807	0.64917		14.34	10.56	755.5	76	26.59	30.72	993.152	1	31	0.0385	0.64935
2020	309.625	11	4	1900-01-01 15:00:00		61.9	9.44	663	452	23.978	38.92	977.956	1	75	0.2807	0.74615		14.27	10.56	755.5	88	26.59	32.3	992.406	1	31	0.0385	0.82251
2020	309.646	11	4	1900-01-01 15:30:00		62.03	9.43	663	452	23.978	43.35	977.541	1	75	0.2807	0.74615		14.27	10.56	755.5	81	26.57	35.53	991.848	1	31	0.0385	0.7215
2020	309.667	11	4	1900-01-01 16:00:00		61.96	9.43	663	472	23.894	46.77	977.229	1	75	0.2807	0.78573		14.34	10.55	755.5	84	26.55	38.22	991.464	1	31	0.0385	0.76479
2020	309.688	11	4	1900-01-01 16:30:00		61.96	9.42	663	495	23.88	48.57	976.977	1	75	0.2807	0.83126		14.27	10.56	755.5	85	26.58	39.86	991.114	1	31	0.0385	0.77922
2020	309.708	11	4	1900-01-01 17:00:00		61.96	9.41	663	525	23.866	49.78	976.791	1	75	0.2807	0.89063		14.34	10.57	755.5	102	26.58	40.99	990.868	1	31	0.0385	1.02453
2020	309.729	11	4	1900-01-01 17:30:00		62.03	9.41	663	557	23.866	50.76	976.669	1	75	0.2807	0.95396		14.27	10.56	755.5	105	26.58	41.9	990.721	1	31	0.0385	1.06782
2020	309.75	11	4	1900-01-01 18:00:00		62.1	9.42	663	606	23.936	51.03	976.613	1	75	0.2807	1.05094		14.34	10.54	755.5	112	26.57	42.44	990.603	1	31	0.0385	1.16883
2020	309.771	11	4	1900-01-01 18:30:00		62.03	9.42	663	662	23.866	51.65	976.682	1	75	0.2807	1.16178		14.27	10.56	755.5	117	26.53	42.88	990.674	1	31	0.0385	1.24098
2020	309.792	11	4	1900-01-01 19:00:00		62.1	9.41	663	715	23.698	52.96	976.74	1	75	0.2807	1.26667		14.34	10.55	755.5	132	26.52	43.64	990.791	1	31	0.0385	1.45743
2020	309.812	11	4	1900-01-01 19:30:00		62.1	9.42	663	817	23.992	53.17	976.856	1	75	0.2807	1.46855		14.34	10.55	755.5	161	26.61	44.31	990.902	1	31	0.0385	1.8759
2020	309.833	11	4	1900-01-01 20:00:00		62.03	9.42	663	819	23.6	54.82	977.081	1	75	0.2807	1.47251		14.34	10.54	755.5	154	26.44	45.14	991.166	1	31	0.0385	1.77489
2020	309.854	11	4	1900-01-01 20:30:00		62.16	9.42	663	755	24.09	54.26	977.069	1	75	0.2807	1.34584		14.27	10.55	755.5	132	26.65	45.42	991.216	1	31	0.0385	1.45743
2020	309.875	11	4	1900-01-01 21:00:00		62.1	9.4	663	935	23.628	55.79	976.804	1	75	0.2807	1.70209		14.34	10.55	755.5	154	26.58	45.9	990.92	1	31	0.0385	1.77489
2020	309.896	11	4	1900-01-01 21:30:00		62.1	9.41	663	852	23.852	55.51	976.612	1	75	0.2807	1.53782		14.34	10.54	755.5	134	26.53	46.21	990.618	1	31	0.0385	1.48629
2020	309.917	11	4	1900-01-01 22:00:00		62.23	9.4	663	885	24.034	55.32	976.472	1	75	0.2807	1.60314		14.27	10.56	755.5	171	26.79	46.07	990.413	1	31	0.0385	2.0202
2020	309.938	11	4	1900-01-01 22:30:00		62.1	9.41	663	923	23.572	56.73	976.612	1	75	0.2807	1.67834		14.27	10.55	755.5	165	26.47	46.71	990.56	1	31	0.0385	1.93362
2020	309.958	11	4	1900-01-01 23:00:00		61.9	9.41	663	968	24.006	55.89	976.59	1	75	0.2807	1.76741		14.21	10.56	755.5	165	26.67	46.65	990.587	1	31	0.0385	1.93362
2020	309.979	11	4	1900-01-01 23:30:00		61.96	9.41	663	1079	24.258	55.15	976.509	1	75	0.2807	1.9871		14.21	10.57	755.5	187	26.9	46.32	990.415	1	31	0.0385	2.25108
2020	310	11	5	1900-01-02		62.03	9.4	663	1159	24.356	54.35	976.563	1	75	0.2807	2.14543		14.21	10.6	755.6	169	27.08	45.71	990.483	1	31	0.0385	1.99134
2020	310.021	11	5	1900-01-02 00:30:00		62.03	9.4	663	1129	23.6	55.89	976.562	1	75	0.2807	2.08605		14.27	10.58	755.5	214	26.69	45.87	990.506	1	31	0.0385	2.64069
2020	310.042	11	5	1900-01-02 01:00:00		61.96	9.4	663	1382	23.908	55.63	976.109	1	75	0.2807	2.58679		14.21	10.57	755.5	236	26.67	46.17	990.056	1	31	0.0385	2.95815
2020	310.062	11	5	1900-01-02 01:30:00		62.03	9.4	663	5086	24.258	52.89	975.661	1	75	0.2807	9.91767		14.21	10.57	755.5	230	26.91	44.72	989.323	1	31	0.0385	2.87157
2020	310.083	11	5	1900-01-02 02:00:00		61.96	9.39	663	12221	23.81	51.45	975.379	1	75	0.2807	24.0391		14.21	10.57	755.6	262	26.82	43.02	989.023	1	31	0.0385	3.33333
2020	310.104	11	5	1900-01-02 02:30:00		61.96	9.4	663	17193	23.866	49.71	975.044	1	75	0.2807	33.8796		14.21	10.57	755.5	272	26.63	41.91	988.534	1	31	0.0385	3.47763
2020	310.125	11	5	1900-01-02 03:00:00		62.1	9.4	663	20486	24.244	47.28	974.798	1	75	0.2807	40.397		14.14	10.57	755.5	251	26.89	40.3	988.242	1	31	0.0385	3.1746
2020	310.146	11	5	1900-01-02 03:30:00		62.03	9.39	663	22628	23.908	46.91	974.557	1	75	0.2807	44.6364		14.21	10.56	755.6	223	26.87	39.39	987.894	1	31	0.0385	2.77056
2020	310.167	11	5	1900-01-02 04:00:00		61.9	9.4	663	23937	23.852	47.04	974.56	1	75	0.2807	47.2272		14.14	10.54	755.6	258	26.66	39.41	987.88	1	31	0.0385	3.27561
2020	310.188	11	5	1900-01-02 04:30:00		61.83	9.4	663	24514	24.174	46.83	974.732	1	75	0.2807	48.3692		14.14	10.54	755.6	247	26.87	39.32	988.032	1	31	0.0385	3.11688
2020	310.208	11	5	1900-01-02 05:00:00		62.03	9.4	663	24737	24.328	48.09	974.995	1	75	0.2807	48.8105		14.14	10.57	755.7	239	27.04	40.13	988.428	1	31	0.0385	3.00144
2020	310.229	11	5	1900-01-02 05:30:00		61.83	9.4	663	24793	24.342	50.87	975.098	1	75	0.2807	48.9213		14.14	10.57	755.8	226	27.1	42.1	988.56	1	31	0.0385	2.81385
2020	310.25	11	5	1900-01-02 06:00:00		61.83	9.4	663	24890	24.328	53.05	975.371	1	75	0.2807	49.1133		14.14	10.57	755.7	209	27.1	43.79	988.927	1	31	0.0385	2.56854
2020	310.271	11	5	1900-01-02 06:30:00		61.83	9.4	663	24947	24.3	53.78	975.429	1	75	0.2807	49.2261		14.07	10.57	755.8	170	27.11	44.47	988.987	1	31	0.0385	2.00577
2020	310.292	11	5	1900-01-02 07:00:00		61.56	9.4	663	24622	24.216	54.93	975.696	1	75	0.2807	48.5829		14.01	10.57	755.9	207	27.08	45.36	989.366	1	31	0.0385	2.53968
2020	310.312	11	5	1900-01-02 07:30:00		61.83	9.4	663	20911	24.034	55.72	975.85	1	75	0.2807	41.2382		14.14	10.57	756	163	26.94	46.02	989.658	1	31	0.0385	1.90476
2020	310.333	11	5	1900-01-02 08:00:00		61.56	9.4	663	13650	23.712	54.69	976.06	1	75	0.2807	26.8674		14.07	10.56	755.9	140	26.66	45.27	989.81	1	31	0.0385	1.57287
2020	310.354	11	5	1900-01-02 08:30:00		61.56	9.4	663	8696	23.446	53.62	976.442	1	75	0.2807	17.0625		14.07	10.56	756	93	26.41	44.41	990.431	1	31	0.0385	0.89466
2020	310.375	11	5	1900-01-02 09:00:00		61.56	9.41	663	5273	23.334	52.86	976.482	1	75	0.2807	10.2878		14.01	10.56	756	91	26.23	43.96	990.492	1	31	0.0385	0.8658
2020	310.396	11	5	1900-01-02 09:30:00		61.43	9.41	663	2978	23.376	51.86	976.454	1	75	0.2807	5.74556		14.01	10.6	755.9	66	26.12	43.45	990.494	1	31	0.0385	0.50505
2020	310.417	11	5	1900-01-02 10:00:00		61.3	9.41	663	1693	23.432	50.23	976.516	1	75	0.2807	3.20231		14.01	10.59	755.8	68	26.07	42.47	990.514	1	31	0.0385	0.53391
2020	310.438	11	5	1900-01-02 10:30:00		61.43	9.42	663	925	23.474	48.49	976.705	1	75	0.2807	1.6823		13.87	10.6	755.7	68	25.99	41.4	990.802	1	31	0.0385	0.53391
2020	310.458	11	5	1900-01-02 11:00:00		61.56	9.42	663	669	23.544	47.33	976.692	1	75	0.2807	1.17563		14.07	10.56	755.1	65	25.89	40.42	990.566	1	31	0.0385	0.49062
2020	310.479	11	5	1900-01-02 11:30:00		61.5	9.43	663	460	23.614	46.6	977.282	1	75	0.2807	0.76198		14.07	10.6	754.8	55	25.83	39.86	991.19	1	31	0.0385	0.34632
2020	310.5	11	5	1900-01-02 12:00:00		61.63	9.43	663	380	23.656	45.76	977.434	1	75	0.2807	0.60365		14.01	10.57	754.9	68	25.87	39.28	991.686	1	31	0.0385	0.53391
2020	310.521	11	5	1900-01-02 12:30:00		61.63	9.43	663	364	23.67	45.05	976.859	1	75	0.2807	0.57198		14.07	10.56	754.8	69	25.86	38.72	990.64	1	31	0.0385	0.54834
2020	310.542	11	5	1900-01-02 13:00:00		61.56	9.43	663	335	23.67	45.49	977.119	1	75	0.2807	0.51459		14.07	10.56	754.8	61	25.92	38.85	991.115	1	31	0.0385	0.4329
2020	310.562	11	5	1900-01-02 13:30:00		61.56	9.43	663	339	23.698	45.46	977.064	1	75	0.2807	0.5225		14.07	10.56	754.8	56	25.93	38.92	990.941	1	31	0.0385	0.36075
2020	310.583	11	5	1900-01-02 14:00:00		61.83	9.43	663	318	23.796	45.28	977.356	1	75	0.2807	0.48094		14.07	10.56	754.9	71	25.98	38.75	991.386	1	31	0.0385	0.5772
2020	310.604	11	5	1900-01-02 14:30:00		61.7	9.43	663	355	23.796	45.7	977.269	1	75	0.2807	0.55417		14.14	10.56	754.9	77	26.03	38.97	991.284	1	31	0.0385	0.66378
2020	310.625	11	5	1900-01-02 15:00:00		61.7	9.43	663	369	23.726	46.29	977.402	1	75	0.2807	0.58188		14.14	10.56	754.9	86	26.07	39.32	991.424	1	31	0.0385	0.79365
2020	310.646	11	5	1900-01-02 15:30:00		61.83	9.43	663	412	23.698	45.68	977.473	1	75	0.2807	0.66698		14.14	10.56	754.9	72	26.06	38.95	991.519	1	31	0.0385	0.59163
2020	310.667	11	5	1900-01-02 16:00:00		62.1	9.44	663	397	23.698	43.94	977.919	1	75	0.2807	0.6373		14.27	10.56	754.9	91	26.08	37.71	992.048	1	31	0.0385	0.8658
2020	310.688	11	5	1900-01-02 16:30:00		61.9	9.45	663	444	23.726	41.99	978.116	1	75	0.2807	0.73032		14.21	10.55	754.9	95	26.07	36.21	992.366	1	31	0.0385	0.92352
2020	310.708	11	5	1900-01-02 17:00:00		62.3	9.45	663	469	23.726	40.75	978.254	1	75	0.2807	0.7798		14.34	10.56	754.9	72	26.12	35.05	992.538	1	31	0.0385	0.59163
2020	310.729	11	5	1900-01-02 17:30:00		62.5	9.45	663	467	23.768	41.59	978.609	1	75	0.2807	0.77584		14.41	10.56	754.9	87	26.12	35.31	992.975	1	31	0.0385	0.80808
2020	310.75	11	5	1900-01-02 18:00:00		62.5	9.45	663	560	23.74	43.3	978.902	1	75	0.2807	0.9599		14.47	10.56	754.9	131	26.12	36.39	993.384	1	31	0.0385	1.443
2020	310.771	11	5	1900-01-02 18:30:00		62.5	9.46	663	632	23.768	44.36	979.108	1	75	0.2807	1.1024		14.47	10.56	754.9	96	26.11	37.26	993.643	1	31	0.0385	0.93795
2020	310.792	11	5	1900-01-02 19:00:00		62.56	9.46	663	697	23.782	45.04	979.479	1	75	0.2807	1.23105		14.47	10.56	754.9	142	26.12	37.85	994.086	1	31	0.0385	1.60173
2020	310.812	11	5	1900-01-02 19:30:00		62.5	9.46	663	840	23.74	45.57	979.955	1	75	0.2807	1.51407		14.41	10.56	754.9	129	26.12	38.31	994.714	1	31	0.0385	1.41414
2020	310.833	11	5	1900-01-02 20:00:00		62.36	9.47	663	827	23.698	45.63	980.135	1	75	0.2807	1.48834		14.41	10.56	754.9	132	26.08	38.51	995.01	1	31	0.0385	1.45743
2020	310.854	11	5	1900-01-02 20:30:00		62.23	9.47	663	772	23.726	44.72	980.259	1	75	0.2807	1.37949		14.34	10.55	754.9	125	26.07	37.98	995.171	1	31	0.0385	1.35642
2020	310.875	11	5	1900-01-02 21:00:00		62.23	9.47	663	730	23.726	44.06	980.594	1	75	0.2807	1.29636		14.34	10.54	754.8	115	26.06	37.53	995.569	1	31	0.0385	1.21212
2020	310.896	11	5	1900-01-02 21:30:00		62.16	9.48	663	703	23.768	43.84	980.822	1	75	0.2807	1.24292		14.27	10.56	754.8	139	26.06	37.32	995.877	1	31	0.0385	1.55844
2020	310.917	11	5	1900-01-02 22:00:00		62.1	9.48	663	755	23.838	43.84	981.09	1	75	0.2807	1.34584		14.34	10.56	754.9	131	26.06	37.3	996.238	1	31	0.0385	1.443
2020	310.938	11	5	1900-01-02 22:30:00		61.96	9.48	663	653	23.782	44.22	981.284	1	75	0.2807	1.14397		14.21	10.56	754.9	104	26.07	37.52	996.494	1	31	0.0385	1.05339
2020	310.958	11	5	1900-01-02 23:00:00		61.76	9.48	663	536	23.796	44.4	981.47	1	75	0.2807	0.9124		14.14	10.56	754.9	95	26.08	37.71	996.715	1	31	0.0385	0.92352
2020	310.979	11	5	1900-01-02 23:30:00		61.9	9.49	663	480	23.782	43.81	981.818	1	75	0.2807	0.80157		14.21	10.56	754.9	76	26.08	37.35	997.152	1	31	0.0385	0.64935
2020	311	11	6	1900-01-03		61.96	9.49	663	394	23.796	43.47	981.999	1	75	0.2807	0.63136		14.14	10.55	754.9	77	26.1	37.03	997.464	1	31	0.0385	0.66378
2020	311.021	11	6	1900-01-03 00:30:00		61.83	9.49	663	385	23.824	43.78	981.931	1	75	0.2807	0.61355		14.21	10.56	755	68	26.11	37.21	997.409	1	31	0.0385	0.53391
2020	311.042	11	6	1900-01-03 01:00:00		61.63	9.48	663	384	23.824	43.85	981.714	1	75	0.2807	0.61157		14.07	10.56	755	74	26.13	37.3	997.151	1	31	0.0385	0.62049
2020	311.062	11	6	1900-01-03 01:30:00		61.7	9.48	663	302	23.796	43.51	981.599	1	75	0.2807	0.44927		14.07	10.56	754.9	64	26.11	37.11	996.964	1	31	0.0385	0.47619
2020	311.083	11	6	1900-01-03 02:00:00		61.96	9.49	663	282	23.81	42.91	981.405	1	75	0.2807	0.40969		14.21	10.54	755	63	26.1	36.67	996.724	1	31	0.0385	0.46176
2020	311.104	11	6	1900-01-03 02:30:00		62.03	9.48	663	261	23.824	42.58	981.275	1	75	0.2807	0.36813		14.21	10.54	755.1	57	26.1	36.39	996.587	1	31	0.0385	0.37518
2020	311.125	11	6	1900-01-03 03:00:00		62.1	9.49	663	279	23.838	42.02	981.363	1	75	0.2807	0.40375		14.21	10.56	755.1	70	26.12	36	996.643	1	31	0.0385	0.56277
2020	311.146	11	6	1900-01-03 03:30:00		61.96	9.49	663	295	23.866	41.01	981.4	1	75	0.2807	0.43542		14.21	10.55	755.1	55	26.12	35.29	996.764	1	31	0.0385	0.34632
2020	311.167	11	6	1900-01-03 04:00:00		62.1	9.49	663	259	23.866	40.62	981.308	1	75	0.2807	0.36417		14.21	10.53	755.2	57	26.13	34.92	996.609	1	31	0.0385	0.37518
2020	311.188	11	6	1900-01-03 04:30:00		62.03	9.49	663	302	23.866	40.34	981.64	1	75	0.2807	0.44927		14.21	10.55	755.3	65	26.15	34.7	997.017	1	31	0.0385	0.49062
2020	311.208	11	6	1900-01-03 05:00:00		62.16	9.49	663	326	23.88	40	981.821	1	75	0.2807	0.49677		14.27	10.55	755.3	70	26.15	34.4	997.309	1	31	0.0385	0.56277
2020	311.229	11	6	1900-01-03 05:30:00		62.3	9.49	663	356	23.838	39.35	981.958	1	75	0.2807	0.55615		14.34	10.53	755.3	74	26.15	33.9	997.46	1	31	0.0385	0.62049
2020	311.25	11	6	1900-01-03 06:00:00		62.3	9.5	663	344	23.852	38.22	982.181	1	75	0.2807	0.5324		14.27	10.53	755.3	75	26.15	33.09	997.783	1	31	0.0385	0.63492
2020	311.271	11	6	1900-01-03 06:30:00		62.3	9.5	663	391	23.866	37.46	982.252	1	75	0.2807	0.62542		14.34	10.53	755.3	72	26.18	32.42	997.874	1	31	0.0385	0.59163
2020	311.292	11	6	1900-01-03 07:00:00		62.5	9.5	663	383	23.838	36.94	982.605	1	75	0.2807	0.60959		14.41	10.53	755.3	78	26.18	31.9	998.284	1	31	0.0385	0.67821
2020	311.312	11	6	1900-01-03 07:30:00		62.43	9.51	663	401	23.838	36.8	982.867	1	75	0.2807	0.64521		14.41	10.54	755.3	75	26.19	31.63	998.683	1	31	0.0385	0.63492
2020	311.333	11	6	1900-01-03 08:00:00		62.43	9.51	663	412	23.852	37.13	982.973	1	75	0.2807	0.66698		14.41	10.54	755.3	103	26.2	31.74	998.808	1	31	0.0385	1.03896
2020	311.354	11	6	1900-01-03 08:30:00		61.83	9.5	663	458	23.908	37.77	983.12	1	75	0.2807	0.75803		14.21	10.55	755.3	79	26.25	32.2	998.982	1	31	0.0385	0.69264
2020	311.375	11	6	1900-01-03 09:00:00		61.76	9.51	663	426	23.894	37.72	983.332	1	75	0.2807	0.69469		14.14	10.56	755.3	82	26.28	32.2	999.292	1	31	0.0385	0.73593
2020	311.396	11	6	1900-01-03 09:30:00		61.63	9.51	663	412	23.838	37.46	983.299	1	75	0.2807	0.66698		14.14	10.56	755.4	87	26.27	31.98	999.265	1	31	0.0385	0.80808
2020	311.417	11	6	1900-01-03 10:00:00		61.76	9.51	663	373	23.992	36.92	983.388	1	75	0.2807	0.5898		14.14	10.56	755.4	84	26.36	31.64	999.328	1	31	0.0385	0.76479
2020	311.438	11	6	1900-01-03 10:30:00		61.83	9.5	663	394	23.936	36.52	983.441	1	75	0.2807	0.63136		14.21	10.55	755.4	78	26.38	31.27	999.414	1	31	0.0385	0.67821
2020	311.458	11	6	1900-01-03 11:00:00		61.76	9.51	663	344	23.866	35.82	983.379	1	75	0.2807	0.5324		14.27	10.56	755.4	68	26.36	30.67	999.361	1	31	0.0385	0.53391
2020	311.479	11	6	1900-01-03 11:30:00		61.9	9.51	663	340	23.81	35.56	983.219	1	75	0.2807	0.52448		14.21	10.53	755.4	60	26.35	30.32	999.171	1	31	0.0385	0.41847
2020	311.5	11	6	1900-01-03 12:00:00		61.96	9.51	663	324	23.824	35.45	983.139	1	75	0.2807	0.49282		14.27	10.53	755.4	56	26.36	30.16	999.053	1	31	0.0385	0.36075
2020	311.521	11	6	1900-01-03 12:30:00		62.03	9.5	663	308	23.838	35.65	983.029	1	75	0.2807	0.46115		14.34	10.53	755.4	69	26.35	30.15	998.929	1	31	0.0385	0.54834
2020	311.542	11	6	1900-01-03 13:00:00		61.96	9.5	663	327	23.838	36.88	982.857	1	75	0.2807	0.49875		14.34	10.55	755.5	54	26.35	30.89	998.708	1	31	0.0385	0.33189
2020	311.562	11	6	1900-01-03 13:30:00		62.03	9.5	663	351	23.838	37.83	982.55	1	75	0.2807	0.54625		14.34	10.56	755.4	78	26.37	31.62	998.333	1	31	0.0385	0.67821
2020	311.583	11	6	1900-01-03 14:00:00		62.1	9.49	663	387	23.81	38.17	982.359	1	75	0.2807	0.6175		14.34	10.56	755.4	97	26.4	31.93	998.079	1	31	0.0385	0.95238
2020	311.604	11	6	1900-01-03 14:30:00		62.1	9.49	663	403	23.796	38.55	982.18	1	75	0.2807	0.64917		14.27	10.55	755.4	72	26.41	32.24	997.816	1	31	0.0385	0.59163
2020	311.625	11	6	1900-01-03 15:00:00		62.16	9.49	663	410	23.754	38.44	982.019	1	75	0.2807	0.66302		14.41	10.54	755.4	88	26.39	32.21	997.636	1	31	0.0385	0.82251
2020	311.646	11	6	1900-01-03 15:30:00		62.1	9.49	663	399	23.712	38.31	981.836	1	75	0.2807	0.64125		14.27	10.53	755.4	87	26.37	32.07	997.382	1	31	0.0385	0.80808
2020	311.667	11	6	1900-01-03 16:00:00		62.1	9.49	663	411	23.67	38.33	981.68	1	75	0.2807	0.665		14.34	10.54	755.4	79	26.36	32.08	997.194	1	31	0.0385	0.69264
2020	311.688	11	6	1900-01-03 16:30:00		62.1	9.49	663	434	23.656	37.95	981.595	1	75	0.2807	0.71053		14.27	10.55	755.4	89	26.33	31.86	997.052	1	31	0.0385	0.83694
2020	311.708	11	6	1900-01-03 17:00:00		62.16	9.49	663	381	23.67	37.29	981.644	1	75	0.2807	0.60563		14.34	10.53	755.4	77	26.31	31.35	997.079	1	31	0.0385	0.66378
2020	311.729	11	6	1900-01-03 17:30:00		62.16	9.49	663	376	23.642	38.7	981.688	1	75	0.2807	0.59573		14.41	10.53	755.4	92	26.3	32.12	997.145	1	31	0.0385	0.88023
2020	311.75	11	6	1900-01-03 18:00:00		62.23	9.49	663	386	23.656	39.36	981.901	1	75	0.2807	0.61552		14.34	10.53	755.4	79	26.25	32.73	997.408	1	31	0.0385	0.69264
2020	311.771	11	6	1900-01-03 18:30:00		62.23	9.49	663	370	23.614	39.1	982.185	1	75	0.2807	0.58386		14.34	10.53	755.4	74	26.26	32.69	997.781	1	31	0.0385	0.62049
2020	311.792	11	6	1900-01-03 19:00:00		62.23	9.49	663	332	23.614	38.96	982.369	1	75	0.2807	0.50865		14.41	10.54	755.4	69	26.26	32.6	998.045	1	31	0.0385	0.54834
2020	311.812	11	6	1900-01-03 19:30:00		62.23	9.49	663	317	23.628	39.4	982.464	1	75	0.2807	0.47896		14.34	10.53	755.4	73	26.23	32.86	998.182	1	31	0.0385	0.60606
2020	311.833	11	6	1900-01-03 20:00:00		62.3	9.5	663	301	23.684	40.4	982.655	1	75	0.2807	0.44729		14.41	10.54	755.4	76	26.21	33.6	998.382	1	31	0.0385	0.64935
2020	311.854	11	6	1900-01-03 20:30:00		62.36	9.5	663	336	23.656	41.25	982.828	1	75	0.2807	0.51657		14.41	10.56	755.4	69	26.21	34.32	998.635	1	31	0.0385	0.54834
2020	311.875	11	6	1900-01-03 21:00:00		62.36	9.5	663	357	23.684	41.61	982.915	1	75	0.2807	0.55813		14.41	10.54	755.4	66	26.21	34.73	998.749	1	31	0.0385	0.50505
2020	311.896	11	6	1900-01-03 21:30:00		62.3	9.5	663	393	23.684	41.84	983.05	1	75	0.2807	0.62938		14.41	10.55	755.4	74	26.21	34.99	998.895	1	31	0.0385	0.62049
2020	311.917	11	6	1900-01-03 22:00:00		62.36	9.5	663	445	23.684	42.05	983.208	1	75	0.2807	0.7323		14.41	10.53	755.4	93	26.22	35.23	999.124	1	31	0.0385	0.89466
2020	311.938	11	6	1900-01-03 22:30:00		62.36	9.5	663	431	23.698	42.31	983.285	1	75	0.2807	0.70459		14.41	10.53	755.4	72	26.17	35.48	999.26	1	31	0.0385	0.59163
2020	311.958	11	6	1900-01-03 23:00:00		62.43	9.5	663	502	23.726	42.35	983.201	1	75	0.2807	0.84511		14.41	10.55	755.4	88	26.21	35.56	999.142	1	31	0.0385	0.82251
2020	311.979	11	6	1900-01-03 23:30:00		62.43	9.5	663	524	23.726	42.31	983.289	1	75	0.2807	0.88865		14.47	10.53	755.4	97	26.2	35.62	999.235	1	31	0.0385	0.95238
2020	312	11	7	1900-01-04		62.43	9.5	663	620	23.726	42.26	983.35	1	75	0.2807	1.07865		14.41	10.56	755.4	126	26.17	35.63	999.328	1	31	0.0385	1.37085
2020	312.021	11	7	1900-01-04 00:30:00		62.3	9.5	663	727	23.684	42.38	983.267	1	75	0.2807	1.29042		14.34	10.56	755.4	128	26.14	35.66	999.251	1	31	0.0385	1.39971
2020	312.042	11	7	1900-01-04 01:00:00		62.3	9.5	663	763	23.712	42.34	983.098	1	75	0.2807	1.36168		14.41	10.56	755.4	135	26.11	35.74	999.016	1	31	0.0385	1.50072
2020	312.062	11	7	1900-01-04 01:30:00		62.3	9.5	663	883	23.67	42.29	982.965	1	75	0.2807	1.59918		14.34	10.55	755.4	142	26.07	35.74	998.854	1	31	0.0385	1.60173
2020	312.083	11	7	1900-01-04 02:00:00		62.36	9.5	663	988	23.74	41.87	982.759	1	75	0.2807	1.80699		14.34	10.56	755.4	160	26.07	35.57	998.594	1	31	0.0385	1.86147
2020	312.104	11	7	1900-01-04 02:30:00		62.36	9.49	663	1009	23.698	41.63	982.706	1	75	0.2807	1.84855		14.41	10.56	755.4	156	26.05	35.38	998.5	1	31	0.0385	1.80375
2020	312.125	11	7	1900-01-04 03:00:00		62.43	9.5	663	1049	23.67	41.41	982.684	1	75	0.2807	1.92772		14.41	10.54	755.4	183	25.99	35.22	998.472	1	31	0.0385	2.19336
2020	312.146	11	7	1900-01-04 03:30:00		62.3	9.5	663	1173	23.67	41.13	982.659	1	75	0.2807	2.17314		14.41	10.54	755.4	171	25.97	35.02	998.428	1	31	0.0385	2.0202
2020	312.167	11	7	1900-01-04 04:00:00		62.5	9.49	663	1070	23.67	41.26	982.733	1	75	0.2807	1.96928		14.34	10.56	755.4	177	25.95	35.09	998.501	1	31	0.0385	2.10678
2020	312.188	11	7	1900-01-04 04:30:00		62.3	9.5	663	1186	23.684	41.2	982.753	1	75	0.2807	2.19887		14.41	10.56	755.4	210	25.95	35.14	998.573	1	31	0.0385	2.58297
2020	312.208	11	7	1900-01-04 05:00:00		62.36	9.49	663	1210	23.67	41.22	982.814	1	75	0.2807	2.24637		14.34	10.56	755.4	196	25.94	35.17	998.604	1	31	0.0385	2.38095
2020	312.229	11	7	1900-01-04 05:30:00		62.3	9.5	663	1171	23.712	41.42	982.903	1	75	0.2807	2.16918		14.34	10.56	755.4	183	25.94	35.3	998.733	1	31	0.0385	2.19336
2020	312.25	11	7	1900-01-04 06:00:00		62.3	9.49	663	1149	23.726	41.87	983.078	1	75	0.2807	2.12564		14.41	10.56	755.4	173	25.98	35.63	998.931	1	31	0.0385	2.04906
2020	312.271	11	7	1900-01-04 06:30:00		62.3	9.5	663	1082	23.74	42.26	983.287	1	75	0.2807	1.99303		14.34	10.55	755.4	174	25.99	35.96	999.193	1	31	0.0385	2.06349
2020	312.292	11	7	1900-01-04 07:00:00		62.36	9.5	663	1037	23.754	42.7	983.665	1	75	0.2807	1.90397		14.34	10.56	755.4	174	26.05	36.27	999.667	1	31	0.0385	2.06349
2020	312.312	11	7	1900-01-04 07:30:00		62.43	9.51	663	1041	23.726	43.27	984.07	1	75	0.2807	1.91189		14.41	10.56	755.4	192	26.08	36.65	1000.19	1	31	0.0385	2.32323
2020	312.333	11	7	1900-01-04 08:00:00		62.43	9.51	663	1177	23.754	43.65	984.405	1	75	0.2807	2.18106		14.41	10.56	755.4	189	26.1	36.99	1000.64	1	31	0.0385	2.27994
2020	312.354	11	7	1900-01-04 08:30:00		62.7	9.51	663	1074	23.88	44.5	984.707	1	75	0.2807	1.9772		0.534	0.562	755.7	113	25.22	38.5	999.862	1	31	0.0385	1.18326
2020	312.375	11	7	1900-01-04 09:00:00		62.7	9.51	663	936	24.048	44.98	984.921	1	75	0.2807	1.70407		0	0.109	755.7	89	24.03	39.83	1000.15	0	31	0.0385	0.83694
2020	312.396	11	7	1900-01-04 09:30:00		62.7	9.51	663	855	23.964	44.68	985.039	1	75	0.2807	1.54376		0	0.103	755.6	69	23.41	40.25	1000.29	0	31	0.0385	0.54834
2020	312.417	11	7	1900-01-04 10:00:00		62.7	9.52	663	676	24.09	43.03	985.2	1	75	0.2807	1.18949		0	0.099	755.6	45	23.1	40.33	1000.48	0	31	0.0385	0.20202
2020	312.438	11	7	1900-01-04 10:30:00		62.83	9.52	663	678	24.202	41.7	985.438	1	75	0.2807	1.19344		0	0.098	755.6	46	22.96	40.17	1000.78	0	31	0.0385	0.21645
2020	312.458	11	7	1900-01-04 11:00:00		62.7	9.53	663	651	24.174	40.94	985.591	1	75	0.2807	1.14001		0	0.097	755.6	30	22.79	40.14	1000.97	0	31	0.0385	-0.01443
2020	312.479	11	7	1900-01-04 11:30:00		62.56	9.52	663	639	24.09	41.63	985.886	1	75	0.2807	1.11626		0	0.096	755.6	36	22.68	40.08	1001.37	0	31	0.0385	0.07215
2020	312.5	11	7	1900-01-04 12:00:00		62.36	9.52	663	598	23.754	44.43	986.085	1	75	0.2807	1.03511		0	0.091	755.6	24	22.41	40.26	1001.68	0	31	0.0385	-0.10101
2020	312.521	11	7	1900-01-04 12:30:00		62.03	9.53	663	588	23.67	44.4	986.081	1	75	0.2807	1.01532		0	0.09	755.6	30	22.23	40.36	1001.7	0	31	0.0385	-0.01443
2020	312.542	11	7	1900-01-04 13:00:00		62.23	9.53	663	578	23.628	41.59	986.16	1	75	0.2807	0.99553		0	0.091	755.6	32	22.11	40.36	1001.81	0	31	0.0385	0.01443
2020	312.562	11	7	1900-01-04 13:30:00		62.03	9.53	663	493	23.572	39.5	986.228	1	75	0.2807	0.8273		0	0.09	755.6	38	22.03	40.32	1001.92	0	31	0.0385	0.10101
2020	312.583	11	7	1900-01-04 14:00:00		62.23	9.53	663	443	23.572	39.77	986.315	1	75	0.2807	0.72834		0	0.089	755.6	45	21.98	40.28	1002.04	0	31	0.0385	0.20202
2020	312.604	11	7	1900-01-04 14:30:00		62.16	9.53	663	377	23.572	39.98	986.328	1	75	0.2807	0.59771		0	0.088	755.6	36	21.93	40.22	1002.06	0	31	0.0385	0.07215
2020	312.625	11	7	1900-01-04 15:00:00		62.23	9.53	663	385	23.572	39.36	986.35	1	75	0.2807	0.61355		0	0.087	755.6	34	21.9	40.18	1002.08	0	31	0.0385	0.04329
2020	312.646	11	7	1900-01-04 15:30:00		61.96	9.53	663	375	23.558	38.73	986.216	1	75	0.2807	0.59375		0	0.087	755.5	30	21.85	40.13	1001.94	0	31	0.0385	-0.01443
2020	312.667	11	7	1900-01-04 16:00:00		62.03	9.53	663	362	23.558	38.1	986.215	1	75	0.2807	0.56802		0	0.088	755.6	27	21.82	40.11	1001.93	0	31	0.0385	-0.05772
2020	312.688	11	7	1900-01-04 16:30:00		62.03	9.54	663	364	23.572	37.12	986.388	1	75	0.2807	0.57198		0	0.088	755.5	44	21.79	40.06	1002.08	0	31	0.0385	0.18759
2020	312.708	11	7	1900-01-04 17:00:00		62.23	9.54	663	347	23.544	36.72	986.667	1	75	0.2807	0.53834		0	0.087	755.6	24	21.77	40.04	1002.47	0	31	0.0385	-0.10101
2020	312.729	11	7	1900-01-04 17:30:00		62.1	9.54	663	315	23.544	37.01	986.872	1	75	0.2807	0.475		0	0.088	755.5	36	21.75	39.99	1002.73	0	31	0.0385	0.07215
2020	312.75	11	7	1900-01-04 18:00:00		62.1	9.54	663	307	23.516	37.76	987.171	1	75	0.2807	0.45917		0	0.087	755.5	31	21.75	39.97	1003.09	0	31	0.0385	0
2020	312.771	11	7	1900-01-04 18:30:00		62.16	9.55	663	260	23.544	38.73	987.535	1	75	0.2807	0.36615		0	0.088	755.6	33	21.71	39.97	1003.56	0	31	0.0385	0.02886
2020	312.792	11	7	1900-01-04 19:00:00		62.5	9.55	663	279	23.572	39.38	987.899	1	75	0.2807	0.40375		0	0.088	755.5	29	21.7	39.92	1004.01	0	31	0.0385	-0.02886
2020	312.812	11	7	1900-01-04 19:30:00		62.36	9.56	663	236	23.586	39.43	988.276	1	75	0.2807	0.31865		0	0.088	755.5	25	21.69	39.86	1004.51	0	31	0.0385	-0.08658
2020	312.833	11	7	1900-01-04 20:00:00		62.5	9.56	663	216	23.572	39.42	988.626	1	75	0.2807	0.27906		0	0.089	755.5	24	21.69	39.83	1004.96	0	31	0.0385	-0.10101
2020	312.854	11	7	1900-01-04 20:30:00		62.56	9.57	663	231	23.586	39.56	988.995	1	75	0.2807	0.30875		0	0.088	755.6	28	21.69	39.81	1005.45	0	31	0.0385	-0.04329
2020	312.875	11	7	1900-01-04 21:00:00		62.56	9.57	663	237	23.614	39.8	989.296	1	75	0.2807	0.32063		0	0.088	755.5	33	21.74	39.78	1005.86	0	31	0.0385	0.02886
2020	312.896	11	7	1900-01-04 21:30:00		62.63	9.57	663	219	23.656	39.95	989.665	1	75	0.2807	0.285		0	0.087	755.5	37	21.74	39.71	1006.3	0	31	0.0385	0.08658
2020	312.917	11	7	1900-01-04 22:00:00		62.63	9.58	663	213	23.67	39.9	989.88	1	75	0.2807	0.27313		0	0.088	755.6	30	21.78	39.66	1006.61	0	31	0.0385	-0.01443
2020	312.938	11	7	1900-01-04 22:30:00		62.7	9.58	663	224	23.642	39.91	990.067	1	75	0.2807	0.2949		0	0.09	755.5	39	21.79	39.66	1006.84	0	31	0.0385	0.11544
2020	312.958	11	7	1900-01-04 23:00:00		62.63	9.58	663	225	23.642	39.48	990.208	1	75	0.2807	0.29688		0	0.089	755.5	24	21.79	39.64	1007.04	0	31	0.0385	-0.10101
2020	312.979	11	7	1900-01-04 23:30:00		62.7	9.58	663	257	23.656	38.73	990.29	1	75	0.2807	0.36021		0	0.089	755.5	34	21.79	39.63	1007.17	0	31	0.0385	0.04329
2020	313	11	8	1900-01-05		62.7	9.58	663	248	23.642	38.08	990.325	1	75	0.2807	0.3424		0	0.088	755.6	21	21.79	39.63	1007.26	0	31	0.0385	-0.1443
2020	313.021	11	8	1900-01-05 00:30:00		62.63	9.58	663	264	23.656	37.46	990.269	1	75	0.2807	0.37406		0	0.088	755.5	39	21.78	39.59	1007.18	0	31	0.0385	0.11544
2020	313.042	11	8	1900-01-05 01:00:00		62.7	9.58	663	266	23.684	36.93	990.14	1	75	0.2807	0.37802		0	0.089	755.6	31	21.8	39.55	1006.98	0	31	0.0385	0
2020	313.062	11	8	1900-01-05 01:30:00		62.7	9.58	663	228	23.67	36.55	990.059	1	75	0.2807	0.30281		0	0.089	755.5	35	21.82	39.52	1006.87	0	31	0.0385	0.05772
2020	313.083	11	8	1900-01-05 02:00:00		62.76	9.58	663	231	23.698	36.04	989.998	1	75	0.2807	0.30875		0	0.088	755.5	38	21.82	39.51	1006.81	0	31	0.0385	0.10101
2020	313.104	11	8	1900-01-05 02:30:00		62.76	9.58	663	256	23.642	35.82	989.87	1	75	0.2807	0.35823		0	0.087	755.6	29	21.79	39.54	1006.66	0	31	0.0385	-0.02886
2020	313.125	11	8	1900-01-05 03:00:00		62.76	9.58	663	278	23.67	35.44	989.776	1	75	0.2807	0.40177		0	0.089	755.5	26	21.79	39.48	1006.54	0	31	0.0385	-0.07215
2020	313.146	11	8	1900-01-05 03:30:00		62.7	9.58	663	271	23.67	35.49	989.812	1	75	0.2807	0.38792		0	0.089	755.6	38	21.79	39.5	1006.57	0	31	0.0385	0.10101
2020	313.167	11	8	1900-01-05 04:00:00		62.7	9.58	663	323	23.684	36.25	989.845	1	75	0.2807	0.49084		0	0.089	755.5	23	21.79	39.51	1006.61	0	31	0.0385	-0.11544
2020	313.188	11	8	1900-01-05 04:30:00		62.76	9.58	663	308	23.656	37.32	989.907	1	75	0.2807	0.46115		0	0.09	755.5	20	21.78	39.48	1006.65	0	31	0.0385	-0.15873
2020	313.208	11	8	1900-01-05 05:00:00		62.7	9.58	663	339	23.726	38.19	989.907	1	75	0.2807	0.5225		0	0.089	755.5	18	21.82	39.44	1006.66	0	31	0.0385	-0.18759
2020	313.229	11	8	1900-01-05 05:30:00		62.7	9.58	663	332	23.712	38.23	989.989	1	75	0.2807	0.50865		0	0.089	755.6	37	21.84	39.43	1006.77	0	31	0.0385	0.08658
2020	313.25	11	8	1900-01-05 06:00:00		62.56	9.58	663	351	23.698	37.66	990.133	1	75	0.2807	0.54625		0	0.089	755.6	25	21.84	39.43	1006.94	0	31	0.0385	-0.08658
2020	313.271	11	8	1900-01-05 06:30:00		62.63	9.59	663	360	23.726	36.99	990.355	1	75	0.2807	0.56407		0	0.09	755.6	26	21.81	39.44	1007.25	0	31	0.0385	-0.07215
2020	313.292	11	8	1900-01-05 07:00:00		62.63	9.59	663	413	23.88	36.81	990.533	1	75	0.2807	0.66896		0	0.09	755.6	33	21.88	39.32	1007.46	0	31	0.0385	0.02886
2020	313.312	11	8	1900-01-05 07:30:00		62.5	9.59	663	405	24.034	36.74	990.785	1	75	0.2807	0.65313		0	0.09	755.6	33	22.03	39.12	1007.78	0	31	0.0385	0.02886
2020	313.333	11	8	1900-01-05 08:00:00		62.43	9.6	663	370	24.258	36.26	991.033	1	75	0.2807	0.58386		0	0.093	755.6	28	22.2	38.9	1008.11	0	31	0.0385	-0.04329
2020	313.354	11	8	1900-01-05 08:30:00		62.43	9.6	663	357	24.482	35.13	991.233	1	75	0.2807	0.55813		0	0.097	755.6	27	22.43	38.63	1008.37	0	31	0.0385	-0.05772
2020	313.375	11	8	1900-01-05 09:00:00		62.43	9.6	663	339	24.706	33.57	991.298	1	75	0.2807	0.5225		0	0.097	755.6	40	22.66	38.39	1008.5	0	31	0.0385	0.12987
2020	313.396	11	8	1900-01-05 09:30:00		62.43	9.59	663	295	24.132	32.89	991.262	1	75	0.2807	0.43542		0	0.096	755.6	20	22.53	38.7	1008.46	0	31	0.0385	-0.15873
2020	313.417	11	8	1900-01-05 10:00:00		62.3	9.61	663	257	24.356	31.76	991.311	1	75	0.2807	0.36021		0	0.096	755.6	35	22.46	38.84	1008.52	0	31	0.0385	0.05772
2020	313.438	11	8	1900-01-05 10:30:00		62.5	9.59	663	236	24.188	31.71	991.319	1	75	0.2807	0.31865		0	0.096	755.6	31	22.55	38.73	1008.53	0	31	0.0385	0
2020	313.458	11	8	1900-01-05 11:00:00		62.36	9.6	663	236	24.062	31.73	991.248	1	75	0.2807	0.31865		0	0.094	755.6	32	22.32	39.12	1008.46	0	31	0.0385	0.01443
2020	313.479	11	8	1900-01-05 11:30:00		62.56	9.61	663	206	24.412	31.46	991.239	1	75	0.2807	0.25927		0	0.096	755.6	32	22.44	38.9	1008.44	0	31	0.0385	0.01443
2020	313.5	11	8	1900-01-05 12:00:00		62.5	9.59	663	227	24.006	32.26	991.03	1	75	0.2807	0.30084		0	0.095	755.6	23	22.39	38.99	1008.2	0	31	0.0385	-0.11544
2020	313.521	11	8	1900-01-05 12:30:00		62.43	9.6	663	234	24.006	32.64	990.857	1	75	0.2807	0.31469		0	0.093	755.6	44	22.19	39.28	1007.95	0	31	0.0385	0.18759
2020	313.542	11	8	1900-01-05 13:00:00		62.5	9.6	663	223	24.286	34.5	990.863	1	75	0.2807	0.29292		0	0.095	755.6	29	22.33	39.05	1007.94	0	31	0.0385	-0.02886
2020	313.562	11	8	1900-01-05 13:30:00		62.43	9.59	663	234	24.384	35.73	990.734	1	75	0.2807	0.31469		0	0.097	755.6	34	22.42	38.92	1007.82	0	31	0.0385	0.04329
2020	313.583	11	8	1900-01-05 14:00:00		62.43	9.59	663	239	24.356	36.23	990.643	1	75	0.2807	0.32459		0	0.095	755.6	36	22.43	38.9	1007.66	0	31	0.0385	0.07215
2020	313.604	11	8	1900-01-05 14:30:00		62.5	9.59	663	204	24.258	36.07	990.419	1	75	0.2807	0.25531		0	0.093	755.6	26	22.43	38.98	1007.37	0	31	0.0385	-0.07215
2020	313.625	11	8	1900-01-05 15:00:00		62.56	9.58	663	187	24.146	35.65	990.277	1	75	0.2807	0.22167		0	0.093	755.6	30	22.37	39.05	1007.21	0	31	0.0385	-0.01443
2020	313.646	11	8	1900-01-05 15:30:00		62.5	9.58	663	176	24.02	35.19	990.075	1	75	0.2807	0.1999		0	0.092	755.6	25	22.31	39.14	1006.94	0	31	0.0385	-0.08658
2020	313.667	11	8	1900-01-05 16:00:00		62.43	9.58	663	180	23.978	34.81	989.908	1	75	0.2807	0.20781		0	0.09	755.6	32	22.26	39.18	1006.71	0	31	0.0385	0.01443
2020	313.688	11	8	1900-01-05 16:30:00		62.36	9.58	663	165	23.964	36.57	989.952	1	75	0.2807	0.17813		0	0.091	755.6	20	22.25	39.2	1006.74	0	31	0.0385	-0.15873
2020	313.708	11	8	1900-01-05 17:00:00		62.5	9.58	663	179	23.922	38.96	990.099	1	75	0.2807	0.20583		0	0.091	755.6	24	22.21	39.26	1006.91	0	31	0.0385	-0.10101
2020	313.729	11	8	1900-01-05 17:30:00		62.5	9.58	663	161	23.838	40.26	990.161	1	75	0.2807	0.17021		0	0.091	755.6	30	22.13	39.34	1007	0	31	0.0385	-0.01443
2020	313.75	11	8	1900-01-05 18:00:00		62.5	9.58	663	164	23.81	41	990.257	1	75	0.2807	0.17615		0	0.091	755.6	33	22.12	39.36	1007.13	0	31	0.0385	0.02886
2020	313.771	11	8	1900-01-05 18:30:00		62.56	9.58	663	156	23.698	40.92	990.46	1	75	0.2807	0.16031		0	0.09	755.6	24	22.05	39.41	1007.4	0	31	0.0385	-0.10101
2020	313.792	11	8	1900-01-05 19:00:00		62.56	9.58	663	171	23.6	39.97	990.576	1	75	0.2807	0.19		0	0.09	755.5	28	21.97	39.5	1007.53	0	31	0.0385	-0.04329
2020	313.812	11	8	1900-01-05 19:30:00		62.63	9.59	663	163	23.516	39.99	990.897	1	75	0.2807	0.17417		0	0.089	755.5	34	21.89	39.58	1007.93	0	31	0.0385	0.04329
2020	313.833	11	8	1900-01-05 20:00:00		62.63	9.59	663	171	23.418	41.29	991.025	1	75	0.2807	0.19		0	0.089	755.6	36	21.83	39.66	1008.19	0	31	0.0385	0.07215
2020	313.854	11	8	1900-01-05 20:30:00		62.56	9.59	663	174	23.376	42.13	991.048	1	75	0.2807	0.19594		0	0.088	755.6	25	21.75	39.74	1008.19	0	31	0.0385	-0.08658
2020	313.875	11	8	1900-01-05 21:00:00		62.63	9.59	663	189	23.418	42.39	991.151	1	75	0.2807	0.22563		0	0.089	755.6	37	21.75	39.72	1008.27	0	31	0.0385	0.08658
2020	313.896	11	8	1900-01-05 21:30:00		62.63	9.59	663	212	23.53	42.22	991.236	1	75	0.2807	0.27115		0	0.088	755.5	36	21.76	39.66	1008.45	0	31	0.0385	0.07215
2020	313.917	11	8	1900-01-05 22:00:00		62.56	9.59	663	283	23.516	42.26	991.219	1	75	0.2807	0.41167		0	0.089	755.5	31	21.79	39.56	1008.46	0	31	0.0385	0
2020	313.938	11	8	1900-01-05 22:30:00		62.63	9.59	663	268	23.488	41.93	991.177	1	75	0.2807	0.38198		0	0.088	755.6	35	21.77	39.6	1008.35	0	31	0.0385	0.05772
2020	313.958	11	8	1900-01-05 23:00:00		62.76	9.59	663	279	23.544	41.32	991.182	1	75	0.2807	0.40375		0	0.088	755.5	29	21.78	39.54	1008.38	0	31	0.0385	-0.02886
2020	313.979	11	8	1900-01-05 23:30:00		62.63	9.59	663	389	23.502	41.11	991.153	1	75	0.2807	0.62146		0	0.089	755.5	32	21.77	39.56	1008.29	0	31	0.0385	0.01443
2020	314	11	9	1900-01-06		62.76	9.59	663	389	23.516	41.01	991.077	1	75	0.2807	0.62146		0	0.089	755.6	32	21.75	39.57	1008.22	0	31	0.0385	0.01443
2020	314.021	11	9	1900-01-06 00:30:00		62.7	9.59	663	468	23.572	40.93	990.965	1	75	0.2807	0.77782		0	0.089	755.6	32	21.76	39.54	1008.1	0	31	0.0385	0.01443
2020	314.042	11	9	1900-01-06 01:00:00		62.63	9.58	663	469	23.6	41.02	990.794	1	75	0.2807	0.7798		0	0.09	755.5	33	21.79	39.49	1007.89	0	31	0.0385	0.02886
2020	314.062	11	9	1900-01-06 01:30:00		62.63	9.58	663	544	23.558	41.27	990.574	1	75	0.2807	0.92823		0	0.089	755.6	25	21.8	39.5	1007.61	0	31	0.0385	-0.08658
2020	314.083	11	9	1900-01-06 02:00:00		62.7	9.58	663	561	23.6	41.52	990.316	1	75	0.2807	0.96188		0	0.088	755.6	36	21.75	39.51	1007.26	0	31	0.0385	0.07215
2020	314.104	11	9	1900-01-06 02:30:00		62.7	9.57	663	633	23.586	41.95	990.101	1	75	0.2807	1.10438		0	0.088	755.6	30	21.79	39.46	1006.96	0	31	0.0385	-0.01443
2020	314.125	11	9	1900-01-06 03:00:00		62.63	9.57	663	669	23.6	42.22	989.981	1	75	0.2807	1.17563		0	0.088	755.5	29	21.78	39.49	1006.82	0	31	0.0385	-0.02886
2020	314.146	11	9	1900-01-06 03:30:00		62.7	9.57	663	700	23.614	42.12	989.936	1	75	0.2807	1.23699		0	0.089	755.5	34	21.75	39.48	1006.73	0	31	0.0385	0.04329
2020	314.167	11	9	1900-01-06 04:00:00		62.83	9.57	663	745	23.656	41.9	989.951	1	75	0.2807	1.32605		0	0.089	755.5	32	21.79	39.43	1006.76	0	31	0.0385	0.01443
2020	314.188	11	9	1900-01-06 04:30:00		62.7	9.57	663	866	23.642	42.06	989.863	1	75	0.2807	1.56553		0	0.09	755.5	27	21.81	39.42	1006.64	0	31	0.0385	-0.05772
2020	314.208	11	9	1900-01-06 05:00:00		62.63	9.57	663	977	23.6	42.18	989.861	1	75	0.2807	1.78522		0	0.09	755.5	23	21.79	39.44	1006.63	0	31	0.0385	-0.11544
2020	314.229	11	9	1900-01-06 05:30:00		62.63	9.57	663	974	23.6	42.48	989.964	1	75	0.2807	1.77928		0	0.089	755.5	20	21.78	39.49	1006.77	0	31	0.0385	-0.15873
2020	314.25	11	9	1900-01-06 06:00:00		62.63	9.58	663	969	23.642	42.61	990.044	1	75	0.2807	1.76939		0	0.09	755.6	35	21.76	39.49	1006.86	0	31	0.0385	0.05772
2020	314.271	11	9	1900-01-06 06:30:00		62.7	9.58	663	990	23.628	42.86	990.256	1	75	0.2807	1.81095		0	0.09	755.6	25	21.79	39.45	1007.11	0	31	0.0385	-0.08658
2020	314.292	11	9	1900-01-06 07:00:00		62.76	9.58	663	1079	23.614	43.41	990.475	1	75	0.2807	1.9871		0	0.089	755.5	28	21.79	39.47	1007.39	0	31	0.0385	-0.04329
2020	314.312	11	9	1900-01-06 07:30:00		62.7	9.58	663	1123	23.642	44.42	990.631	1	75	0.2807	2.07418		0	0.09	755.6	30	21.79	39.45	1007.58	0	31	0.0385	-0.01443
2020	314.333	11	9	1900-01-06 08:00:00		62.63	9.58	663	1067	23.628	45.86	990.74	1	75	0.2807	1.96335		0	0.089	755.5	21	21.78	39.44	1007.79	0	31	0.0385	-0.1443
2020	314.354	11	9	1900-01-06 08:30:00		62.16	9.57	663	863	23.712	46.82	990.78	1	75	0.2807	1.55959		14.07	10.29	754.4	77	22.67	40.85	1008.88	1	31	0.0385	0.66378
2020	314.375	11	9	1900-01-06 09:00:00		62.16	9.57	663	610	23.74	47.58	990.755	1	75	0.2807	1.05886		14.47	10.52	754.4	69	24.3	42.88	1008.88	1	31	0.0385	0.54834
2020	314.396	11	9	1900-01-06 09:30:00		62.1	9.58	663	447	23.88	47.38	990.781	1	75	0.2807	0.73625		14.41	10.64	754.6	55	25.12	43.48	1008.9	1	31	0.0385	0.34632
2020	314.417	11	9	1900-01-06 10:00:00		62.23	9.58	663	358	23.922	46.29	990.775	1	75	0.2807	0.56011		14.41	10.67	754.6	65	25.63	42.22	1008.88	1	31	0.0385	0.49062
2020	314.438	11	9	1900-01-06 10:30:00		62.1	9.58	663	342	23.824	45.94	990.808	1	75	0.2807	0.52844		14.34	10.67	754.6	57	25.86	41.02	1008.91	1	31	0.0385	0.37518
2020	314.458	11	9	1900-01-06 11:00:00		62.1	9.58	663	268	23.81	46.14	990.725	1	75	0.2807	0.38198		14.41	10.67	754.7	49	26.05	40.35	1008.83	1	31	0.0385	0.25974
2020	314.479	11	9	1900-01-06 11:30:00		62.1	9.57	663	276	23.754	46.66	990.552	1	75	0.2807	0.39781		14.34	10.68	754.7	62	26.14	40.1	1008.57	1	31	0.0385	0.44733
2020	314.5	11	9	1900-01-06 12:00:00		62.1	9.57	663	259	23.824	45.35	990.283	1	75	0.2807	0.36417		14.34	10.66	754.7	46	26.25	39.02	1008.26	1	31	0.0385	0.21645
2020	314.521	11	9	1900-01-06 12:30:00		62.03	9.57	663	236	24.034	42.39	989.883	1	75	0.2807	0.31865		14.27	10.66	754.7	49	26.34	36.88	1007.71	1	31	0.0385	0.25974
2020	314.542	11	9	1900-01-06 13:00:00		62.16	9.57	663	203	24.258	40.01	989.688	1	75	0.2807	0.25333		14.34	10.65	754.8	52	26.48	34.99	1007.37	1	31	0.0385	0.30303
2020	314.562	11	9	1900-01-06 13:30:00		62.1	9.57	663	190	24.356	39.43	989.413	1	75	0.2807	0.22761		14.27	10.66	754.8	45	26.6	34.19	1007.07	1	31	0.0385	0.20202
2020	314.583	11	9	1900-01-06 14:00:00		62.1	9.57	663	183	24.44	39.67	989.103	1	75	0.2807	0.21375		14.34	10.68	754.8	41	26.7	34.08	1006.65	1	31	0.0385	0.1443
2020	314.604	11	9	1900-01-06 14:30:00		62.1	9.56	663	205	24.44	40.21	988.791	1	75	0.2807	0.25729		14.34	10.67	754.8	41	26.74	34.25	1006.27	1	31	0.0385	0.1443
2020	314.625	11	9	1900-01-06 15:00:00		62.03	9.56	663	236	24.426	40.63	988.509	1	75	0.2807	0.31865		14.27	10.66	754.9	42	26.8	34.44	1005.88	1	31	0.0385	0.15873
2020	314.646	11	9	1900-01-06 15:30:00		62.1	9.55	663	194	24.244	40.3	988.196	1	75	0.2807	0.23552		14.27	10.66	754.9	40	26.8	34.05	1005.48	1	31	0.0385	0.12987
2020	314.667	11	9	1900-01-06 16:00:00		62.1	9.55	663	188	24.034	39.92	987.99	1	75	0.2807	0.22365		14.34	10.66	754.8	35	26.73	33.49	1005.19	1	31	0.0385	0.05772
2020	314.688	11	9	1900-01-06 16:30:00		62.1	9.55	663	198	23.866	40.17	987.744	1	75	0.2807	0.24344		14.34	10.65	754.8	40	26.63	33.4	1004.88	1	31	0.0385	0.12987
2020	314.708	11	9	1900-01-06 17:00:00		62.1	9.55	663	174	23.768	40.46	987.646	1	75	0.2807	0.19594		14.27	10.65	754.8	38	26.51	33.46	1004.72	1	31	0.0385	0.10101
2020	314.729	11	9	1900-01-06 17:30:00		62.1	9.55	663	174	23.67	40.74	987.705	1	75	0.2807	0.19594		14.34	10.65	754.7	31	26.44	33.59	1004.81	1	31	0.0385	0
2020	314.75	11	9	1900-01-06 18:00:00		62.03	9.55	663	154	23.6	41.06	987.68	1	75	0.2807	0.15636		14.27	10.63	754.7	42	26.36	33.82	1004.82	1	31	0.0385	0.15873
2020	314.771	11	9	1900-01-06 18:30:00		62.1	9.55	663	159	23.544	41.26	987.706	1	75	0.2807	0.16625		14.34	10.63	754.7	31	26.27	34.03	1004.83	1	31	0.0385	0
2020	314.792	11	9	1900-01-06 19:00:00		62.16	9.55	663	203	23.544	41.18	987.801	1	75	0.2807	0.25333		14.34	10.62	754.7	48	26.21	34.06	1004.94	1	31	0.0385	0.24531
2020	314.812	11	9	1900-01-06 19:30:00		62.16	9.55	663	179	23.544	40.76	987.931	1	75	0.2807	0.20583		14.41	10.62	754.7	49	26.17	33.82	1005.14	1	31	0.0385	0.25974
2020	314.833	11	9	1900-01-06 20:00:00		62.23	9.55	663	186	23.544	40.57	988.021	1	75	0.2807	0.21969		14.34	10.62	754.7	44	26.16	33.73	1005.22	1	31	0.0385	0.18759
2020	314.854	11	9	1900-01-06 20:30:00		62.16	9.56	663	176	23.558	40.61	988.132	1	75	0.2807	0.1999		14.34	10.62	754.7	32	26.12	33.79	1005.36	1	31	0.0385	0.01443
2020	314.875	11	9	1900-01-06 21:00:00		62.23	9.56	663	197	23.6	40.46	988.326	1	75	0.2807	0.24146		14.41	10.6	754.7	50	26.13	33.74	1005.63	1	31	0.0385	0.27417
2020	314.896	11	9	1900-01-06 21:30:00		62.23	9.56	663	208	23.558	40.39	988.49	1	75	0.2807	0.26323		14.41	10.57	754.7	49	26.11	33.73	1005.84	1	31	0.0385	0.25974
2020	314.917	11	9	1900-01-06 22:00:00		62.3	9.56	663	239	23.628	40.1	988.569	1	75	0.2807	0.32459		14.41	10.57	754.7	50	26.12	33.57	1005.95	1	31	0.0385	0.27417
2020	314.938	11	9	1900-01-06 22:30:00		62.3	9.56	663	290	23.628	40.05	988.579	1	75	0.2807	0.42552		14.34	10.57	754.7	61	26.16	33.5	1005.99	1	31	0.0385	0.4329
2020	314.958	11	9	1900-01-06 23:00:00		62.3	9.56	663	333	23.614	40.19	988.644	1	75	0.2807	0.51063		14.41	10.57	754.7	71	26.12	33.56	1006.05	1	31	0.0385	0.5772
2020	314.979	11	9	1900-01-06 23:30:00		62.23	9.56	663	432	23.642	40.62	988.606	1	75	0.2807	0.70657		14.41	10.57	754.7	90	26.12	33.86	1006.03	1	31	0.0385	0.85137
2020	315	11	10	1900-01-07		62.3	9.56	663	573	23.614	41.08	988.554	1	75	0.2807	0.98563		14.41	10.57	754.7	112	26.12	34.18	1005.96	1	31	0.0385	1.16883
2020	315.021	11	10	1900-01-07 00:30:00		62.23	9.55	663	716	23.628	41.33	988.367	1	75	0.2807	1.26865		14.41	10.56	754.7	124	26.12	34.44	1005.76	1	31	0.0385	1.34199
2020	315.042	11	10	1900-01-07 01:00:00		62.3	9.55	663	858	23.614	41.74	988.156	1	75	0.2807	1.5497		14.41	10.56	754.7	155	26.13	34.72	1005.46	1	31	0.0385	1.78932
2020	315.062	11	10	1900-01-07 01:30:00		62.3	9.55	663	976	23.628	41.69	987.837	1	75	0.2807	1.78324		14.41	10.56	754.7	166	26.1	34.81	1005.07	1	31	0.0385	1.94805
2020	315.083	11	10	1900-01-07 02:00:00		62.3	9.55	663	955	23.642	41.3	987.709	1	75	0.2807	1.74168		14.41	10.56	754.7	173	26.08	34.61	1004.88	1	31	0.0385	2.04906
2020	315.104	11	10	1900-01-07 02:30:00		62.3	9.55	663	1106	23.656	41.31	987.581	1	75	0.2807	2.04053		14.41	10.56	754.7	185	26.08	34.61	1004.7	1	31	0.0385	2.22222
2020	315.125	11	10	1900-01-07 03:00:00		62.23	9.55	663	1191	23.642	41.39	987.498	1	75	0.2807	2.20876		14.41	10.56	754.7	181	26.03	34.72	1004.61	1	31	0.0385	2.1645
2020	315.146	11	10	1900-01-07 03:30:00		62.16	9.55	663	1203	23.642	41.23	987.343	1	75	0.2807	2.23251		14.34	10.56	754.7	188	26.02	34.67	1004.4	1	31	0.0385	2.26551
2020	315.167	11	10	1900-01-07 04:00:00		62.23	9.55	663	1302	23.67	40.96	987.231	1	75	0.2807	2.42845		14.41	10.56	754.6	176	25.98	34.55	1004.26	1	31	0.0385	2.09235
2020	315.188	11	10	1900-01-07 04:30:00		62.23	9.55	663	1247	23.656	40.82	987.166	1	75	0.2807	2.3196		14.34	10.56	754.6	187	25.94	34.48	1004.16	1	31	0.0385	2.25108
2020	315.208	11	10	1900-01-07 05:00:00		62.23	9.55	663	1396	23.684	40.61	987.152	1	75	0.2807	2.6145		14.41	10.56	754.7	191	25.94	34.37	1004.12	1	31	0.0385	2.3088
2020	315.229	11	10	1900-01-07 05:30:00		62.16	9.55	663	1423	23.698	40.25	987.26	1	75	0.2807	2.66793		14.34	10.56	754.6	214	25.94	34.15	1004.25	1	31	0.0385	2.64069
2020	315.25	11	10	1900-01-07 06:00:00		62.23	9.55	663	1572	23.698	39.79	987.433	1	75	0.2807	2.96283		14.41	10.56	754.7	263	25.94	33.84	1004.48	1	31	0.0385	3.34776
2020	315.271	11	10	1900-01-07 06:30:00		62.23	9.55	663	1475	23.684	39.51	987.627	1	75	0.2807	2.77085		14.41	10.56	754.6	238	25.93	33.58	1004.69	1	31	0.0385	2.98701
2020	315.292	11	10	1900-01-07 07:00:00		62.3	9.56	663	1486	23.796	39.42	987.894	1	75	0.2807	2.79262		14.34	10.56	754.6	217	25.94	33.55	1005.05	1	31	0.0385	2.68398
2020	315.312	11	10	1900-01-07 07:30:00		62.23	9.56	663	1580	23.81	40.02	988.108	1	75	0.2807	2.97866		14.47	10.57	754.7	239	26.05	33.87	1005.33	1	31	0.0385	3.00144
2020	315.333	11	10	1900-01-07 08:00:00		62.23	9.56	663	1719	23.754	41.12	988.276	1	75	0.2807	3.25377		14.41	10.57	754.7	288	26.1	34.56	1005.61	1	31	0.0385	3.70851
2020	315.354	11	10	1900-01-07 08:30:00		62.16	9.56	663	1396	23.908	41.78	988.301	1	75	0.2807	2.6145		14.34	10.57	754.7	220	26.18	35.22	1005.65	1	31	0.0385	2.72727
2020	315.375	11	10	1900-01-07 09:00:00		62.16	9.56	663	1074	24.454	40.88	988.21	1	75	0.2807	1.9772		14.41	10.6	754.7	159	26.53	35	1005.46	1	31	0.0385	1.84704
2020	315.396	11	10	1900-01-07 09:30:00		62.16	9.56	663	810	24.678	40.25	988.175	1	75	0.2807	1.4547		14.34	10.65	754.8	118	26.82	34.53	1005.42	1	31	0.0385	1.25541
2020	315.417	11	10	1900-01-07 10:00:00		62.16	9.55	663	621	24.524	39.9	988.052	1	75	0.2807	1.08063		14.41	10.67	754.9	82	26.93	34.03	1005.26	1	31	0.0385	0.73593
2020	315.438	11	10	1900-01-07 10:30:00		62.1	9.56	663	506	24.146	39.63	987.924	1	75	0.2807	0.85303		14.41	10.65	754.8	79	26.63	33.53	1005.12	1	31	0.0385	0.69264
2020	315.458	11	10	1900-01-07 11:00:00		62.16	9.56	663	471	24.594	38.03	987.683	1	75	0.2807	0.78375		14.34	10.66	754.8	88	26.86	32.54	1004.8	1	31	0.0385	0.82251
2020	315.479	11	10	1900-01-07 11:30:00		62.16	9.54	663	467	24.552	37.99	987.338	1	75	0.2807	0.77584		14.41	10.66	754.8	92	27.01	32.17	1004.36	1	31	0.0385	0.88023
2020	315.5	11	10	1900-01-07 12:00:00		62.1	9.55	663	511	24.286	38.35	986.935	1	75	0.2807	0.86292		14.34	10.66	754.8	85	26.78	32.32	1003.87	1	31	0.0385	0.77922
2020	315.521	11	10	1900-01-07 12:30:00		62.1	9.53	663	475	24.426	37.85	986.544	1	75	0.2807	0.79167		14.41	10.65	754.8	79	26.89	31.89	1003.34	1	31	0.0385	0.69264
2020	315.542	11	10	1900-01-07 13:00:00		62.03	9.53	663	478	24.216	38.07	986.257	1	75	0.2807	0.79761		14.34	10.63	754.8	87	26.67	31.96	1002.92	1	31	0.0385	0.80808
2020	315.562	11	10	1900-01-07 13:30:00		62.1	9.53	663.1	486	24.51	37.17	985.806	1	75	0.2807	0.81344		14.41	10.63	754.8	102	26.79	31.45	1002.34	1	31	0.0385	1.02453
2020	315.583	11	10	1900-01-07 14:00:00		61.96	9.53	663.4	422	24.258	37.76	985.495	1	75	0.2807	0.68678		14.34	10.6	754.8	89	26.64	31.66	1001.93	1	31	0.0385	0.83694
2020	315.604	11	10	1900-01-07 14:30:00		62.03	9.52	663.7	335	24.58	38.43	985.142	1	75	0.2807	0.51459		14.34	10.61	754.9	84	26.79	32.26	1001.49	1	31	0.0385	0.76479
2020	315.625	11	10	1900-01-07 15:00:00		62.03	9.51	663.7	313	24.748	39.47	984.883	1	75	0.2807	0.47104		14.34	10.64	755.2	74	27.03	33.14	1001.22	1	31	0.0385	0.62049
2020	315.646	11	10	1900-01-07 15:30:00		62.03	9.51	663.7	276	24.748	40.49	984.613	1	75	0.2807	0.39781		14.34	10.66	755.2	44	27.11	33.88	1000.87	1	31	0.0385	0.18759
2020	315.667	11	10	1900-01-07 16:00:00		62.03	9.5	663.7	251	24.65	40.64	984.285	1	75	0.2807	0.34834		14.34	10.66	755.2	50	27.14	34.02	1000.42	1	31	0.0385	0.27417
2020	315.688	11	10	1900-01-07 16:30:00		62.03	9.5	663.7	209	24.608	40.39	984.197	1	75	0.2807	0.26521		14.34	10.66	755.2	57	27.14	33.78	1000.27	1	31	0.0385	0.37518
2020	315.708	11	10	1900-01-07 17:00:00		62.03	9.5	663.7	199	24.566	40.56	984.14	1	75	0.2807	0.24542		14.41	10.66	755.2	42	27.12	33.79	1000.19	1	31	0.0385	0.15873
2020	315.729	11	10	1900-01-07 17:30:00		62.1	9.5	663.7	184	24.44	41.25	984.099	1	75	0.2807	0.21573		14.34	10.65	755.2	53	27.06	34.16	1000.12	1	31	0.0385	0.31746
2020	315.75	11	10	1900-01-07 18:00:00		62.03	9.5	663.6	196	24.3	41.7	984.151	1	75	0.2807	0.23948		14.34	10.63	755.2	45	26.99	34.42	1000.19	1	31	0.0385	0.20202
2020	315.771	11	10	1900-01-07 18:30:00		62.1	9.5	663.5	182	24.202	41.86	984.226	1	75	0.2807	0.21177		14.41	10.63	755.2	44	26.91	34.51	1000.31	1	31	0.0385	0.18759
2020	315.792	11	10	1900-01-07 19:00:00		62.1	9.5	663.4	187	24.132	42.28	984.407	1	75	0.2807	0.22167		14.34	10.63	755.2	50	26.81	34.8	1000.53	1	31	0.0385	0.27417
2020	315.812	11	10	1900-01-07 19:30:00		62.03	9.5	663.3	187	24.076	42.82	984.521	1	75	0.2807	0.22167		14.41	10.58	755.1	46	26.73	35.23	1000.7	1	31	0.0385	0.21645
2020	315.833	11	10	1900-01-07 20:00:00		62.1	9.5	663.2	184	23.95	42.93	984.704	1	75	0.2807	0.21573		14.41	10.57	755.1	54	26.61	35.37	1000.93	1	31	0.0385	0.33189
2020	315.854	11	10	1900-01-07 20:30:00		62.16	9.51	663.1	212	23.838	43.26	984.967	1	75	0.2807	0.27115		14.34	10.57	755	48	26.47	35.61	1001.25	1	31	0.0385	0.24531
2020	315.875	11	10	1900-01-07 21:00:00		62.1	9.51	663	212	23.782	43.94	985.193	1	75	0.2807	0.27115		14.41	10.57	755	43	26.38	36.14	1001.57	1	31	0.0385	0.17316
2020	315.896	11	10	1900-01-07 21:30:00		62.1	9.51	663	235	23.754	44.71	985.32	1	75	0.2807	0.31667		14.41	10.61	755.1	59	26.33	36.79	1001.74	1	31	0.0385	0.40404
2020	315.917	11	10	1900-01-07 22:00:00		62.16	9.51	663	302	23.698	45.52	985.431	1	75	0.2807	0.44927		14.41	10.58	755.1	67	26.26	37.52	1001.9	1	31	0.0385	0.51948
2020	315.938	11	10	1900-01-07 22:30:00		62.1	9.51	663	332	23.642	46.38	985.576	1	75	0.2807	0.50865		14.41	10.57	755	80	26.2	38.22	1002.08	1	31	0.0385	0.70707
2020	315.958	11	10	1900-01-07 23:00:00		62.16	9.51	663	410	23.572	47.12	985.553	1	75	0.2807	0.66302		14.41	10.56	755	78	26.15	38.84	1002.07	1	31	0.0385	0.67821
2020	315.979	11	10	1900-01-07 23:30:00		62.16	9.51	663	482	23.558	47.51	985.604	1	75	0.2807	0.80553		14.41	10.56	755	94	26.11	39.31	1002.12	1	31	0.0385	0.90909
2020	316	11	11	1900-01-08		62.23	9.51	663	496	23.586	47.89	985.543	1	75	0.2807	0.83323		14.47	10.56	755	90	26.09	39.7	1002.07	1	31	0.0385	0.85137
2020	316.021	11	11	1900-01-08 00:30:00		62.16	9.51	663	496	23.6	48.19	985.377	1	75	0.2807	0.83323		14.41	10.56	755	94	26.08	40	1001.88	1	31	0.0385	0.90909
2020	316.042	11	11	1900-01-08 01:00:00		62.23	9.5	663	539	23.586	48.4	985.136	1	75	0.2807	0.91834		14.41	10.56	755	110	26.09	40.26	1001.59	1	31	0.0385	1.13997
2020	316.062	11	11	1900-01-08 01:30:00		62.23	9.5	663	713	23.6	48.37	984.916	1	75	0.2807	1.26272		14.41	10.56	755	101	26.08	40.3	1001.32	1	31	0.0385	1.0101
2020	316.083	11	11	1900-01-08 02:00:00		62.23	9.5	663	757	23.6	48.16	984.661	1	75	0.2807	1.3498		14.41	10.56	755	131	26.08	40.21	1000.98	1	31	0.0385	1.443
2020	316.104	11	11	1900-01-08 02:30:00		62.23	9.49	663	804	23.698	47.59	984.407	1	75	0.2807	1.44282		14.41	10.56	755	136	26.11	39.95	1000.62	1	31	0.0385	1.51515
2020	316.125	11	11	1900-01-08 03:00:00		62.1	9.49	663.1	847	23.684	47.38	984.185	1	75	0.2807	1.52793		14.41	10.56	755	152	26.12	39.74	1000.32	1	31	0.0385	1.74603
2020	316.146	11	11	1900-01-08 03:30:00		62.23	9.49	663	837	23.656	47.2	984.013	1	75	0.2807	1.50813		14.34	10.56	755.1	129	26.08	39.58	1000.08	1	31	0.0385	1.41414
2020	316.167	11	11	1900-01-08 04:00:00		62.16	9.49	663.1	876	23.698	46.93	983.726	1	75	0.2807	1.58532		14.41	10.56	755	128	26.08	39.43	999.742	1	31	0.0385	1.39971
2020	316.188	11	11	1900-01-08 04:30:00		62.3	9.49	663.1	851	23.698	46.81	983.621	1	75	0.2807	1.53584		14.41	10.56	755	162	26.09	39.34	999.537	1	31	0.0385	1.89033
2020	316.208	11	11	1900-01-08 05:00:00		62.3	9.48	663.1	1035	23.726	46.55	983.655	1	75	0.2807	1.90001		14.47	10.56	755	157	26.12	39.16	999.566	1	31	0.0385	1.81818
2020	316.229	11	11	1900-01-08 05:30:00		62.3	9.49	663.1	1104	23.712	46.44	983.74	1	75	0.2807	2.03658		14.41	10.56	755	193	26.11	39.02	999.692	1	31	0.0385	2.33766
2020	316.25	11	11	1900-01-08 06:00:00		62.3	9.49	663.1	1143	23.698	47.05	983.989	1	75	0.2807	2.11376		14.47	10.56	755	212	26.11	39.43	999.979	1	31	0.0385	2.61183
2020	316.271	11	11	1900-01-08 06:30:00		62.23	9.49	663.1	1245	23.782	47.52	984.179	1	75	0.2807	2.31564		14.41	10.56	755	225	26.13	39.82	1000.27	1	31	0.0385	2.79942
2020	316.292	11	11	1900-01-08 07:00:00		62.23	9.49	663.1	1128	23.894	49.02	984.202	1	75	0.2807	2.08408		14.34	10.56	755	183	26.22	41.07	1000.28	1	31	0.0385	2.19336
2020	316.312	11	11	1900-01-08 07:30:00		62.1	9.49	663.2	1058	24.146	49.76	984.209	1	75	0.2807	1.94553		14.34	10.57	755	152	26.38	41.97	1000.31	1	31	0.0385	1.74603
2020	316.333	11	11	1900-01-08 08:00:00		62.03	9.48	663.5	874	24.552	49.8	984.231	1	75	0.2807	1.58136		14.34	10.6	755	131	26.72	42.26	1000.27	1	31	0.0385	1.443
2020	316.354	11	11	1900-01-08 08:30:00		61.96	9.49	663.4	747	24.44	51.24	984.29	1	75	0.2807	1.33001		14.27	10.6	754.9	143	26.64	43.22	1000.3	1	31	0.0385	1.61616
2020	316.375	11	11	1900-01-08 09:00:00		59.43	9.48	663.5	608	24.454	52.18	984.586	1	75	0.2807	1.0549		14.34	10.62	754.9	119	26.69	43.82	1000.27	1	31	0.0385	1.26984
2020	316.396	11	11	1900-01-08 09:30:00		61.76	9.47	663.6	574	24.44	52.98	984.02	1	75	0.2807	0.98761		14.27	10.59	754.9	82	26.72	44.44	999.95	1	31	0.0385	0.73593
2020	316.417	11	11	1900-01-08 10:00:00		61.76	9.47	663.5	551	24.37	53.03	983.919	1	75	0.2807	0.94209		14.27	10.58	754.9	121	26.7	44.54	999.779	1	31	0.0385	1.2987
2020	316.438	11	11	1900-01-08 10:30:00		61.83	9.46	663.3	607	24.3	52.9	983.792	1	75	0.2807	1.05292		14.27	10.57	754.8	115	26.67	44.32	999.681	1	31	0.0385	1.21212
2020	316.458	11	11	1900-01-08 11:00:00		61.83	9.46	663.2	680	24.286	52.17	983.386	1	75	0.2807	1.1974		14.34	10.57	754.8	113	26.67	43.81	999.206	1	31	0.0385	1.18326
2020	316.479	11	11	1900-01-08 11:30:00		61.9	9.46	663.3	616	24.342	51.21	982.917	1	75	0.2807	1.07074		14.41	10.57	754.7	125	26.64	43.13	998.517	1	31	0.0385	1.35642
2020	316.5	11	11	1900-01-08 12:00:00		61.83	9.46	663.3	604	24.37	50.68	982.612	1	75	0.2807	1.04699		14.61	10.57	755.1	112	26.79	42.7	998.268	1	31	0.0385	1.16883
2020	316.521	11	11	1900-01-08 12:30:00		61.83	9.46	663.3	552	24.286	51.17	982.375	1	75	0.2807	0.94407		14.67	10.57	755.3	99	26.72	42.9	997.963	1	31	0.0385	0.98124
2020	316.542	11	11	1900-01-08 13:00:00		61.83	9.45	663.2	518	24.188	53.92	982.111	1	75	0.2807	0.87678		14.61	10.57	755.6	107	26.67	44.9	997.682	1	31	0.0385	1.09668
2020	316.562	11	11	1900-01-08 13:30:00		61.76	9.45	663.2	481	24.118	56.2	981.803	1	75	0.2807	0.80355		14.67	10.55	755.6	58	26.64	46.67	997.314	1	31	0.0385	0.38961
2020	316.583	11	11	1900-01-08 14:00:00		61.76	9.44	663.3	419	24.202	57.22	981.587	1	75	0.2807	0.68084		14.61	10.55	755.5	84	26.68	47.76	997.007	1	31	0.0385	0.76479
2020	316.604	11	11	1900-01-08 14:30:00		61.76	9.44	663.3	481	24.216	57.71	981.271	1	75	0.2807	0.80355		14.61	10.57	755.6	76	26.68	48.33	996.618	1	31	0.0385	0.64935
2020	316.625	11	11	1900-01-08 15:00:00		61.76	9.43	663.4	414	24.244	57.92	980.986	1	75	0.2807	0.67094		14.61	10.55	755.5	94	26.69	48.65	996.267	1	31	0.0385	0.90909
2020	316.646	11	11	1900-01-08 15:30:00		61.76	9.43	663.2	459	24.076	58.53	980.72	1	75	0.2807	0.76		14.61	10.54	755.5	86	26.63	48.94	995.893	1	31	0.0385	0.79365
2020	316.667	11	11	1900-01-08 16:00:00		61.83	9.42	663.3	455	24.132	59.18	980.513	1	75	0.2807	0.75209		14.67	10.54	755.6	95	26.73	49.4	995.63	1	31	0.0385	0.92352
2020	316.688	11	11	1900-01-08 16:30:00		61.76	9.42	663.3	457	24.202	59.51	980.151	1	75	0.2807	0.75605		14.61	10.54	755.5	85	26.67	49.95	995.167	1	31	0.0385	0.77922
2020	316.708	11	11	1900-01-08 17:00:00		61.76	9.41	663.1	432	23.978	60.09	979.857	1	75	0.2807	0.70657		14.67	10.54	755.6	98	26.67	49.95	994.767	1	31	0.0385	0.96681
2020	316.729	11	11	1900-01-08 17:30:00		61.83	9.42	663.3	439	24.258	59.28	979.785	1	75	0.2807	0.72042		14.61	10.54	755.5	101	26.73	49.85	994.64	1	31	0.0385	1.0101
2020	316.75	11	11	1900-01-08 18:00:00		61.76	9.41	663.1	469	23.824	59.82	979.678	1	75	0.2807	0.7798		14.67	10.54	755.5	93	26.58	49.63	994.516	1	31	0.0385	0.89466
2020	316.771	11	11	1900-01-08 18:30:00		61.83	9.42	663.4	540	24.23	57.69	979.727	1	75	0.2807	0.92032		14.61	10.54	755.5	97	26.69	48.61	994.514	1	31	0.0385	0.95238
2020	316.792	11	11	1900-01-08 19:00:00		61.9	9.41	663.3	588	23.964	57.47	979.689	1	75	0.2807	1.01532		14.67	10.55	755.6	97	26.74	47.85	994.517	1	31	0.0385	0.95238
2020	316.812	11	11	1900-01-08 19:30:00		61.83	9.42	663.1	630	23.95	57.48	979.741	1	75	0.2807	1.09844		14.61	10.54	755.5	106	26.56	48	994.559	1	31	0.0385	1.08225
2020	316.833	11	11	1900-01-08 20:00:00		61.9	9.42	663.5	608	24.258	57.58	979.666	1	75	0.2807	1.0549		14.67	10.54	755.5	99	26.77	48.28	994.463	1	31	0.0385	0.98124
2020	316.854	11	11	1900-01-08 20:30:00		61.96	9.42	663.7	630	24.398	57.84	979.594	1	75	0.2807	1.09844		14.67	10.56	755.6	115	26.94	48.59	994.358	1	31	0.0385	1.21212
2020	316.875	11	11	1900-01-08 21:00:00		61.96	9.42	663.7	598	24.468	57.76	979.631	1	75	0.2807	1.03511		14.67	10.57	755.6	110	27.02	48.54	994.393	1	31	0.0385	1.13997
2020	316.896	11	11	1900-01-08 21:30:00		62.03	9.42	663.7	608	24.51	57.64	979.731	1	75	0.2807	1.0549		14.67	10.57	755.6	102	27.08	48.39	994.487	1	31	0.0385	1.02453
2020	316.917	11	11	1900-01-08 22:00:00		61.96	9.42	663.7	564	24.552	57.72	980.029	1	75	0.2807	0.96782		14.61	10.57	755.6	105	27.13	48.39	994.842	1	31	0.0385	1.06782
2020	316.938	11	11	1900-01-08 22:30:00		62.03	9.42	663.7	553	24.58	58.13	980.182	1	75	0.2807	0.94605		14.67	10.57	755.6	96	27.19	48.59	995.115	1	31	0.0385	0.93795
2020	316.958	11	11	1900-01-08 23:00:00		62.1	9.42	663.7	520	24.58	58.52	980.353	1	75	0.2807	0.88073		14.74	10.57	755.7	88	27.2	48.89	995.295	1	31	0.0385	0.82251
2020	316.979	11	11	1900-01-08 23:30:00		62.1	9.42	663.6	522	24.398	59.29	980.512	1	75	0.2807	0.88469		14.67	10.57	755.7	92	27.19	49.15	995.567	1	31	0.0385	0.88023
2020	317	11	12	1900-01-09		61.83	9.42	663	541	23.656	61.41	980.292	1	75	0.2807	0.9223		14.74	10.57	755.6	105	26.68	50.09	995.332	1	31	0.0385	1.06782
2020	317.021	11	12	1900-01-09 00:30:00		61.96	9.42	663.1	584	23.908	60.85	980.012	1	75	0.2807	1.0074		14.67	10.55	755.5	113	26.61	50.3	994.992	1	31	0.0385	1.18326
2020	317.042	11	12	1900-01-09 01:00:00		62.03	9.42	663.3	642	24.09	60.47	979.745	1	75	0.2807	1.12219		14.67	10.54	755.5	119	26.67	50.37	994.597	1	31	0.0385	1.26984
2020	317.062	11	12	1900-01-09 01:30:00		62.1	9.41	663.5	688	24.16	60.33	979.31	1	75	0.2807	1.21324		14.67	10.55	755.6	129	26.72	50.44	994.075	1	31	0.0385	1.41414
2020	317.083	11	12	1900-01-09 02:00:00		62.03	9.41	663.5	692	24.202	60.27	979.003	1	75	0.2807	1.22115		14.67	10.54	755.6	146	26.75	50.46	993.643	1	31	0.0385	1.65945
2020	317.104	11	12	1900-01-09 02:30:00		62.1	9.4	663.5	788	24.188	60.25	978.682	1	75	0.2807	1.41115		14.74	10.54	755.6	141	26.73	50.46	993.25	1	31	0.0385	1.5873
2020	317.125	11	12	1900-01-09 03:00:00		62.03	9.4	663.5	807	24.188	60.24	978.257	1	75	0.2807	1.44876		14.67	10.54	755.6	142	26.75	50.4	992.7	1	31	0.0385	1.60173
2020	317.146	11	12	1900-01-09 03:30:00		62.1	9.4	663.5	823	24.146	60.21	978.207	1	75	0.2807	1.48043		14.74	10.54	755.6	156	26.74	50.37	992.546	1	31	0.0385	1.80375
2020	317.167	11	12	1900-01-09 04:00:00		62.03	9.4	663.4	885	24.118	60.14	978.023	1	75	0.2807	1.60314		14.67	10.54	755.6	166	26.71	50.31	992.374	1	31	0.0385	1.94805
2020	317.188	11	12	1900-01-09 04:30:00		62.03	9.39	663.4	937	24.076	59.94	977.801	1	75	0.2807	1.70605		14.74	10.53	755.5	173	26.67	50.14	992.047	1	31	0.0385	2.04906
2020	317.208	11	12	1900-01-09 05:00:00		62.1	9.39	663.3	1002	24.034	59.81	977.696	1	75	0.2807	1.8347		14.74	10.51	755.5	175	26.62	50.02	991.905	1	31	0.0385	2.07792
2020	317.229	11	12	1900-01-09 05:30:00		62.16	9.39	663.3	1042	23.978	59.6	977.694	1	75	0.2807	1.91387		14.67	10.52	755.5	199	26.59	49.82	991.922	1	31	0.0385	2.42424
2020	317.25	11	12	1900-01-09 06:00:00		62.1	9.39	663.2	1130	23.922	59.5	977.704	1	75	0.2807	2.08803		14.74	10.52	755.5	195	26.55	49.73	991.903	1	31	0.0385	2.36652
2020	317.271	11	12	1900-01-09 06:30:00		62.03	9.39	663.2	1205	23.936	59.47	977.684	1	75	0.2807	2.23647		14.74	10.54	755.5	194	26.51	49.72	991.888	1	31	0.0385	2.35209
2020	317.292	11	12	1900-01-09 07:00:00		62.03	9.4	663.3	1326	24.146	59.27	977.717	1	75	0.2807	2.47595		14.67	10.54	755.5	217	26.59	49.9	991.912	1	31	0.0385	2.68398
2020	317.312	11	12	1900-01-09 07:30:00		61.96	9.39	663.5	1357	24.384	59.13	977.609	1	75	0.2807	2.53731		14.67	10.54	755.6	238	26.83	49.95	991.779	1	31	0.0385	2.98701
2020	317.333	11	12	1900-01-09 08:00:00		61.9	9.39	663.1	1295	23.88	60.19	977.599	1	75	0.2807	2.4146		14.67	10.52	755.5	242	26.54	50.2	991.777	1	31	0.0385	3.04473
2020	317.354	11	12	1900-01-09 08:30:00		61.96	9.4	663.3	1415	24.216	59.17	977.607	1	75	0.2807	2.6521		14.61	10.52	755.6	227	26.69	49.83	991.745	1	31	0.0385	2.82828
2020	317.375	11	12	1900-01-09 09:00:00		62.03	9.39	663.6	1383	24.538	58.76	977.63	1	75	0.2807	2.58877		14.67	10.53	755.5	221	26.93	49.79	991.769	1	31	0.0385	2.7417
2020	317.396	11	12	1900-01-09 09:30:00		62.03	9.39	663.6	1474	24.608	59.24	977.541	1	75	0.2807	2.76887		14.67	10.57	755.6	258	27.1	50.04	991.702	1	31	0.0385	3.27561
2020	317.417	11	12	1900-01-09 10:00:00		61.9	9.39	663.4	1579	24.356	60.21	977.27	1	75	0.2807	2.97669		14.61	10.56	755.6	301	26.9	50.53	991.366	1	31	0.0385	3.8961
2020	317.438	11	12	1900-01-09 10:30:00		61.83	9.38	663.2	1858	24.23	59.77	977.083	1	75	0.2807	3.52888		14.61	10.55	755.6	292	26.81	50.02	991.11	1	31	0.0385	3.76623
2020	317.458	11	12	1900-01-09 11:00:00		61.76	9.38	663.1	1917	24.244	59.08	976.854	1	75	0.2807	3.64565		14.67	10.54	755.6	286	26.76	49.53	990.851	1	31	0.0385	3.67965
2020	317.479	11	12	1900-01-09 11:30:00		61.83	9.38	663.1	1987	24.104	57.9	976.592	1	75	0.2807	3.78419		14.61	10.54	755.6	321	26.69	48.6	990.462	1	31	0.0385	4.1847
2020	317.5	11	12	1900-01-09 12:00:00		61.83	9.38	663.1	2113	24.118	54.92	976.437	1	75	0.2807	4.03357		14.61	10.53	755.6	341	26.65	46.44	990.284	1	31	0.0385	4.4733
2020	317.521	11	12	1900-01-09 12:30:00		61.83	9.38	663.1	2207	23.992	52.47	976.185	1	75	0.2807	4.21961		14.67	10.51	755.6	352	26.59	44.36	989.932	1	31	0.0385	4.63203
2020	317.542	11	12	1900-01-09 13:00:00		61.83	9.38	663	2320	23.88	50.75	975.957	1	75	0.2807	4.44326		14.67	10.51	755.6	384	26.52	42.82	989.631	1	31	0.0385	5.0938
2020	317.562	11	12	1900-01-09 13:30:00		61.83	9.38	663	2323	23.852	50.5	975.66	1	75	0.2807	4.44919		14.61	10.51	755.5	373	26.48	42.4	989.271	1	31	0.0385	4.93506
2020	317.583	11	12	1900-01-09 14:00:00		61.83	9.38	663	2313	23.81	51.01	975.265	1	75	0.2807	4.4294		14.67	10.52	755.5	360	26.46	42.7	988.775	1	31	0.0385	4.74747
2020	317.604	11	12	1900-01-09 14:30:00		61.83	9.38	663	2253	23.768	49.41	974.957	1	75	0.2807	4.31065		14.61	10.51	755.4	354	26.4	41.68	988.33	1	31	0.0385	4.66089
2020	317.625	11	12	1900-01-09 15:00:00		61.9	9.38	663	2031	23.684	45.68	974.701	1	75	0.2807	3.87127		14.67	10.51	755.4	296	26.34	38.85	988.021	1	31	0.0385	3.82395
2020	317.646	11	12	1900-01-09 15:30:00		61.76	9.38	663	1807	23.698	43.8	974.503	1	75	0.2807	3.42794		14.61	10.52	755.5	300	26.3	37.24	987.741	1	31	0.0385	3.88167
2020	317.667	11	12	1900-01-09 16:00:00		61.9	9.38	663	1639	23.67	43.8	974.266	1	75	0.2807	3.09544		14.67	10.51	755.4	300	26.31	36.93	987.433	1	31	0.0385	3.88167
2020	317.688	11	12	1900-01-09 16:30:00		61.83	9.38	663	1660	23.67	43.97	974.139	1	75	0.2807	3.137		14.67	10.51	755.4	263	26.29	36.96	987.258	1	31	0.0385	3.34776
2020	317.708	11	12	1900-01-09 17:00:00		61.83	9.38	663	1574	23.67	44.49	974.071	1	75	0.2807	2.96679		14.61	10.52	755.4	266	26.29	37.25	987.165	1	31	0.0385	3.39105
2020	317.729	11	12	1900-01-09 17:30:00		61.76	9.37	663	1678	23.684	45.12	973.918	1	75	0.2807	3.17262		14.67	10.51	755.4	299	26.32	37.69	986.994	1	31	0.0385	3.86724
2020	317.75	11	12	1900-01-09 18:00:00		61.83	9.37	663	1769	23.698	45.78	973.673	1	75	0.2807	3.35273		14.61	10.49	755.4	260	26.33	38.16	986.645	1	31	0.0385	3.30447
2020	317.771	11	12	1900-01-09 18:30:00		61.83	9.36	663	1778	23.698	46.52	973.714	1	75	0.2807	3.37054		14.67	10.48	755.4	295	26.34	38.68	986.651	1	31	0.0385	3.80952
2020	317.792	11	12	1900-01-09 19:00:00		61.9	9.36	663	1942	23.74	50.13	973.9	1	75	0.2807	3.69513		14.61	10.5	755.4	284	26.37	41.16	986.89	1	31	0.0385	3.65079
2020	317.812	11	12	1900-01-09 19:30:00		61.83	9.36	663	1726	23.782	56.04	973.92	1	75	0.2807	3.26762		14.61	10.5	755.4	292	26.41	45.94	986.935	1	31	0.0385	3.76623
2020	317.833	11	12	1900-01-09 20:00:00		61.83	9.35	663	1628	23.81	59.04	973.915	1	75	0.2807	3.07367		14.61	10.5	755.4	271	26.41	48.66	986.947	1	31	0.0385	3.4632
2020	317.854	11	12	1900-01-09 20:30:00		61.83	9.35	663	1604	23.698	60.24	973.853	1	75	0.2807	3.02616		14.67	10.48	755.5	283	26.45	49.54	986.883	1	31	0.0385	3.63636
2020	317.875	11	12	1900-01-09 21:00:00		61.83	9.35	663	1506	23.782	59.86	973.858	1	75	0.2807	2.83221		14.61	10.49	755.5	247	26.52	49.43	986.837	1	31	0.0385	3.11688
2020	317.896	11	12	1900-01-09 21:30:00		61.9	9.35	663	1544	23.908	59.37	974.006	1	75	0.2807	2.90741		14.61	10.46	755.5	244	26.51	49.38	987.027	1	31	0.0385	3.07359
2020	317.917	11	12	1900-01-09 22:00:00		61.83	9.35	663	1546	23.726	59.97	974.069	1	75	0.2807	2.91137		14.61	10.48	755.5	266	26.46	49.62	987.131	1	31	0.0385	3.39105
2020	317.938	11	12	1900-01-09 22:30:00		61.96	9.35	663	1636	23.726	60.05	974.04	1	75	0.2807	3.0895		14.61	10.46	755.5	279	26.52	49.57	987.087	1	31	0.0385	3.57864
2020	317.958	11	12	1900-01-09 23:00:00		62.03	9.35	663	1573	23.866	59.68	974.053	1	75	0.2807	2.96481		14.67	10.46	755.5	273	26.51	49.64	987.089	1	31	0.0385	3.49206
2020	317.979	11	12	1900-01-09 23:30:00		61.96	9.36	663	1690	23.614	60.28	974.457	1	75	0.2807	3.19637		14.67	10.49	755.5	283	26.4	49.76	987.464	1	31	0.0385	3.63636
2020	318	11	13	1900-01-10		62.03	9.36	663	1870	23.726	59.65	975.146	1	75	0.2807	3.55263		14.67	10.48	755.5	300	26.5	49.37	988.596	1	31	0.0385	3.88167
2020	318.021	11	13	1900-01-10 00:30:00		62.03	9.36	663	1838	23.768	59.72	974.726	1	75	0.2807	3.48929		14.74	10.46	755.5	334	26.4	49.65	988.106	1	31	0.0385	4.37229
2020	318.042	11	13	1900-01-10 01:00:00		62.03	9.34	663	1897	23.838	61.23	974.227	1	75	0.2807	3.60606		14.67	10.46	755.5	307	26.61	50.65	987.354	1	31	0.0385	3.98268
2020	318.062	11	13	1900-01-10 01:30:00		62.03	9.35	663	1906	23.642	61.91	973.936	1	75	0.2807	3.62388		14.67	10.46	755.5	336	26.36	51.3	987.051	1	31	0.0385	4.40115
2020	318.083	11	13	1900-01-10 02:00:00		62.1	9.35	663.1	2100	24.132	60.85	974.055	1	75	0.2807	4.00784		14.67	10.46	755.5	321	26.65	50.98	987.012	1	31	0.0385	4.1847
2020	318.104	11	13	1900-01-10 02:30:00		62.16	9.33	663.1	2005	23.782	62.54	973.905	1	75	0.2807	3.81982		14.74	10.48	755.5	356	26.67	51.6	987.007	1	31	0.0385	4.68975
2020	318.125	11	13	1900-01-10 03:00:00		62.03	9.34	663	2017	23.698	63.21	973.689	1	75	0.2807	3.84357		14.67	10.46	755.5	349	26.41	52.35	986.666	1	31	0.0385	4.58874
2020	318.146	11	13	1900-01-10 03:30:00		62.16	9.34	663.2	2178	24.104	62.66	973.491	1	75	0.2807	4.16221		14.67	10.47	755.5	339	26.66	52.39	986.366	1	31	0.0385	4.44444
2020	318.167	11	13	1900-01-10 04:00:00		62.1	9.34	663.4	2112	24.314	62.62	973.479	1	75	0.2807	4.03159		14.67	10.52	755.5	358	26.87	52.52	986.378	1	31	0.0385	4.71861
2020	318.188	11	13	1900-01-10 04:30:00		62.1	9.34	663.6	2253	24.426	62.36	973.149	1	75	0.2807	4.31065		14.67	10.54	755.6	350	27.02	52.34	985.971	1	31	0.0385	4.60317
2020	318.208	11	13	1900-01-10 05:00:00		62.16	9.33	663.6	2136	24.468	62.42	973.045	1	75	0.2807	4.07909		14.67	10.55	755.6	366	27.1	52.24	985.738	1	31	0.0385	4.83405
2020	318.229	11	13	1900-01-10 05:30:00		62.23	9.33	663.7	2258	24.496	62.91	973.165	1	75	0.2807	4.32055		14.67	10.57	755.7	339	27.17	52.55	985.919	1	31	0.0385	4.44444
2020	318.25	11	13	1900-01-10 06:00:00		62.1	9.32	663.1	2137	23.796	64.86	973.138	1	75	0.2807	4.08107		14.74	10.54	755.6	344	26.88	53	985.945	1	31	0.0385	4.51659
2020	318.271	11	13	1900-01-10 06:30:00		61.96	9.34	663	2136	23.74	64.84	973.136	1	75	0.2807	4.07909		14.67	10.52	755.6	334	26.6	53.28	985.935	1	31	0.0385	4.37229
2020	318.292	11	13	1900-01-10 07:00:00		62.03	9.34	663.2	2172	24.174	63.77	973.058	1	75	0.2807	4.15034		14.61	10.52	755.6	305	26.75	53.15	985.797	1	31	0.0385	3.95382
2020	318.312	11	13	1900-01-10 07:30:00		61.96	9.33	663.1	2053	23.964	64.75	973.132	1	75	0.2807	3.91482		14.61	10.49	755.5	352	26.74	53.55	985.917	1	31	0.0385	4.63203
2020	318.333	11	13	1900-01-10 08:00:00		61.96	9.33	663	2082	23.95	64.84	973.388	1	75	0.2807	3.97221		14.61	10.46	755.5	341	26.69	53.68	986.191	1	31	0.0385	4.4733
2020	318.354	11	13	1900-01-10 08:30:00		61.9	9.34	663	1981	23.754	65.23	973.504	1	75	0.2807	3.77232		14.67	10.46	755.6	359	26.51	53.93	986.374	1	31	0.0385	4.73304
2020	318.375	11	13	1900-01-10 09:00:00		61.96	9.34	663.2	1970	24.272	64.18	973.477	1	75	0.2807	3.75054		14.54	10.51	755.5	324	26.82	53.76	986.343	1	31	0.0385	4.22799
2020	318.396	11	13	1900-01-10 09:30:00		61.83	9.33	663.1	1951	23.964	65.05	973.531	1	75	0.2807	3.71294		14.61	10.5	755.6	333	26.79	53.9	986.405	1	31	0.0385	4.35786
2020	318.417	11	13	1900-01-10 10:00:00		61.83	9.34	663.1	1932	23.964	63.7	973.483	1	75	0.2807	3.67534		14.61	10.49	755.8	320	26.79	52.87	986.436	1	31	0.0385	4.17027
2020	318.438	11	13	1900-01-10 10:30:00		61.83	9.34	663	2125	24.006	62.6	973.252	1	75	0.2807	4.05732		14.61	10.46	755.9	360	26.76	52.13	986.158	1	31	0.0385	4.74747
2020	318.458	11	13	1900-01-10 11:00:00		61.9	9.34	663	2064	23.964	61.92	973.128	1	75	0.2807	3.93659		14.67	10.46	755.9	344	26.7	51.57	986.018	1	31	0.0385	4.51659
2020	318.479	11	13	1900-01-10 11:30:00		61.83	9.34	663	2014	23.852	60.93	972.876	1	75	0.2807	3.83763		14.61	10.46	755.9	380	26.62	50.69	985.653	1	31	0.0385	5.03608
2020	318.5	11	13	1900-01-10 12:00:00		61.9	9.33	663	2022	23.782	59.82	972.685	1	75	0.2807	3.85346		14.67	10.46	755.9	337	26.57	49.77	985.455	1	31	0.0385	4.41558
2020	318.521	11	13	1900-01-10 12:30:00		61.96	9.33	663	2028	23.81	58.82	972.347	1	75	0.2807	3.86534		14.67	10.46	755.8	330	26.56	49.01	985.021	1	31	0.0385	4.31457
2020	318.542	11	13	1900-01-10 13:00:00		61.9	9.33	663	1967	23.81	57.97	971.996	1	75	0.2807	3.74461		14.67	10.46	755.8	298	26.55	48.41	984.551	1	31	0.0385	3.85281
2020	318.562	11	13	1900-01-10 13:30:00		61.96	9.33	663	1957	23.824	57.34	971.659	1	75	0.2807	3.72481		14.61	10.46	755.8	308	26.52	47.95	984.111	1	31	0.0385	3.99711
2020	318.583	11	13	1900-01-10 14:00:00		61.96	9.33	663	1871	23.838	56.77	971.38	1	75	0.2807	3.55461		14.67	10.46	755.8	299	26.51	47.56	983.7	1	31	0.0385	3.86724
2020	318.604	11	13	1900-01-10 14:30:00		61.96	9.32	663	1922	23.824	55.56	970.99	1	75	0.2807	3.65554		14.67	10.46	755.8	317	26.45	46.8	983.235	1	31	0.0385	4.12698
2020	318.625	11	13	1900-01-10 15:00:00		61.9	9.32	663	1953	23.768	54.04	970.467	1	75	0.2807	3.7169		14.67	10.46	755.8	301	26.39	45.62	982.615	1	31	0.0385	3.8961
2020	318.646	11	13	1900-01-10 15:30:00		62.03	9.33	663	1920	23.726	52.43	970.89	1	75	0.2807	3.65159		14.67	10.45	755.8	292	26.36	44.32	982.735	1	31	0.0385	3.76623
2020	318.667	11	13	1900-01-10 16:00:00		62.03	9.33	663	1850	23.614	51.95	972.14	1	75	0.2807	3.51304		14.74	10.46	755.7	287	26.34	43.59	984.54	1	31	0.0385	3.69408
2020	318.688	11	13	1900-01-10 16:30:00		61.9	9.35	663	1676	23.81	55.03	972.552	1	75	0.2807	3.16867		14.61	10.48	755.7	239	26.33	46.15	985.201	1	31	0.0385	3.00144
2020	318.708	11	13	1900-01-10 17:00:00		61.63	9.34	663.2	1511	24.202	56.99	971.938	1	75	0.2807	2.8421		14.47	10.46	755.7	264	26.65	48.09	984.414	1	31	0.0385	3.36219
2020	318.729	11	13	1900-01-10 17:30:00		61.76	9.32	663.2	1501	23.992	58.09	971.915	1	75	0.2807	2.82231		14.54	10.46	755.7	224	26.72	48.56	984.342	1	31	0.0385	2.78499
2020	318.75	11	13	1900-01-10 18:00:00		61.96	9.33	663	1319	23.684	57.66	972.014	1	75	0.2807	2.4621		14.67	10.46	755.6	221	26.36	48.2	984.426	1	31	0.0385	2.7417
2020	318.771	11	13	1900-01-10 18:30:00		62.1	9.33	663.1	1331	24.006	55.85	972.202	1	75	0.2807	2.48585		14.67	10.46	755.6	243	26.62	46.93	984.682	1	31	0.0385	3.05916
2020	318.792	11	13	1900-01-10 19:00:00		62.03	9.34	663	1334	23.544	56.73	972.446	1	75	0.2807	2.49179		14.67	10.46	755.6	226	26.29	47.16	985	1	31	0.0385	2.81385
2020	318.812	11	13	1900-01-10 19:30:00		62.03	9.35	663.1	1345	24.062	55.03	972.903	1	75	0.2807	2.51356		14.67	10.46	755.5	226	26.53	46.45	985.506	1	31	0.0385	2.81385
2020	318.833	11	13	1900-01-10 20:00:00		62.16	9.35	663.3	1372	24.202	54.32	973.531	1	75	0.2807	2.567		14.67	10.46	755.6	217	26.85	45.66	986.316	1	31	0.0385	2.68398
2020	318.854	11	13	1900-01-10 20:30:00		62.1	9.35	663	1372	23.53	56.93	973.89	1	75	0.2807	2.567		14.74	10.46	755.6	221	26.4	46.98	986.876	1	31	0.0385	2.7417
2020	318.875	11	13	1900-01-10 21:00:00		62.1	9.36	663	1588	23.922	56.31	974.02	1	75	0.2807	2.9945		14.67	10.46	755.5	268	26.53	46.96	987	1	31	0.0385	3.41991
2020	318.896	11	13	1900-01-10 21:30:00		62.1	9.36	663.2	1704	24.16	55.57	974.236	1	75	0.2807	3.22408		14.67	10.47	755.6	270	26.78	46.58	987.33	1	31	0.0385	3.44877
2020	318.917	11	13	1900-01-10 22:00:00		62.16	9.36	663.4	1656	24.244	53.27	974.055	1	75	0.2807	3.12908		14.67	10.48	755.6	287	26.87	44.89	987.112	1	31	0.0385	3.69408
2020	318.938	11	13	1900-01-10 22:30:00		61.96	9.36	663.5	1629	24.272	52.08	973.873	1	75	0.2807	3.07564		14.67	10.46	755.5	296	26.93	43.79	986.879	1	31	0.0385	3.82395
2020	318.958	11	13	1900-01-10 23:00:00		62.1	9.36	663.4	1690	24.258	51.8	973.955	1	75	0.2807	3.19637		14.61	10.46	755.6	268	26.92	43.39	986.921	1	31	0.0385	3.41991
2020	318.979	11	13	1900-01-10 23:30:00		62.16	9.36	663.4	1630	24.244	51.28	973.948	1	75	0.2807	3.07762		14.67	10.46	755.6	268	26.92	42.96	986.941	1	31	0.0385	3.41991
2020	319	11	14	1900-01-11		62.23	9.36	663.4	1598	24.23	49.87	973.994	1	75	0.2807	3.01429		14.74	10.46	755.6	285	26.92	41.83	986.964	1	31	0.0385	3.66522
2020	319.021	11	14	1900-01-11 00:30:00		62.23	9.37	663.3	1633	24.188	49.08	974.01	1	75	0.2807	3.08356		14.74	10.46	755.6	291	26.89	41.06	987.035	1	31	0.0385	3.7518
2020	319.042	11	14	1900-01-11 01:00:00		62.23	9.37	663.3	1722	24.132	49.19	973.951	1	75	0.2807	3.25971		14.67	10.46	755.6	269	26.83	41.04	986.941	1	31	0.0385	3.43434
2020	319.062	11	14	1900-01-11 01:30:00		62.23	9.37	663.2	1828	24.062	49.55	973.768	1	75	0.2807	3.4695		14.74	10.46	755.6	288	26.76	41.26	986.764	1	31	0.0385	3.70851
2020	319.083	11	14	1900-01-11 02:00:00		62.1	9.36	663.1	1899	24.02	49.64	973.599	1	75	0.2807	3.61002		14.67	10.46	755.6	273	26.7	41.31	986.534	1	31	0.0385	3.49206
2020	319.104	11	14	1900-01-11 02:30:00		62.1	9.36	663	1988	23.908	50.02	973.763	1	75	0.2807	3.78617		14.67	10.46	755.6	318	26.61	41.52	986.689	1	31	0.0385	4.14141
2020	319.125	11	14	1900-01-11 03:00:00		62.03	9.37	663.1	1970	23.866	49.79	973.921	1	75	0.2807	3.75054		14.67	10.46	755.6	296	26.56	41.44	986.907	1	31	0.0385	3.82395
2020	319.146	11	14	1900-01-11 03:30:00		62.03	9.37	663	1994	23.81	50.48	974.184	1	75	0.2807	3.79804		14.67	10.45	755.6	303	26.5	41.86	987.234	1	31	0.0385	3.92496
2020	319.167	11	14	1900-01-11 04:00:00		62.03	9.37	663	1955	23.726	51.39	974.455	1	75	0.2807	3.72086		14.61	10.46	755.6	300	26.39	42.58	987.614	1	31	0.0385	3.88167
2020	319.188	11	14	1900-01-11 04:30:00		61.96	9.37	663	1979	23.67	52.81	974.641	1	75	0.2807	3.76836		14.67	10.5	755.5	340	26.3	43.7	987.895	1	31	0.0385	4.45887
2020	319.208	11	14	1900-01-11 05:00:00		61.96	9.37	663	2029	23.642	55	974.768	1	75	0.2807	3.86732		14.61	10.5	755.5	324	26.28	45.5	988.045	1	31	0.0385	4.22799
2020	319.229	11	14	1900-01-11 05:30:00		62.03	9.37	663	1925	23.642	56.23	974.97	1	75	0.2807	3.66148		14.67	10.51	755.5	301	26.22	46.64	988.281	1	31	0.0385	3.8961
2020	319.25	11	14	1900-01-11 06:00:00		62.03	9.37	663	1890	23.6	56.85	975.231	1	75	0.2807	3.59221		14.61	10.51	755.4	300	26.19	47.28	988.656	1	31	0.0385	3.88167
2020	319.271	11	14	1900-01-11 06:30:00		61.96	9.37	663	1942	23.6	56.94	975.497	1	75	0.2807	3.69513		14.67	10.51	755.5	334	26.2	47.43	988.977	1	31	0.0385	4.37229
2020	319.292	11	14	1900-01-11 07:00:00		62.03	9.38	663	1962	23.782	56.69	975.662	1	75	0.2807	3.73471		14.61	10.49	755.5	321	26.24	47.62	989.161	1	31	0.0385	4.1847
2020	319.312	11	14	1900-01-11 07:30:00		61.9	9.38	663.1	2119	24.3	54.31	975.94	1	75	0.2807	4.04544		14.54	10.5	755.5	326	26.56	46.5	989.532	1	31	0.0385	4.25685
2020	319.333	11	14	1900-01-11 08:00:00		61.9	9.39	663	2264	24.048	51.93	976.119	1	75	0.2807	4.33242		14.61	10.47	755.5	404	26.46	44.25	989.72	1	31	0.0385	5.3824
2020	319.354	11	14	1900-01-11 08:30:00		61.96	9.39	663	2451	23.922	50.42	976.442	1	75	0.2807	4.70253		14.67	10.5	755.6	388	26.37	42.78	990.166	1	31	0.0385	5.15152
2020	319.375	11	14	1900-01-11 09:00:00		61.76	9.39	663	2529	23.866	48.62	976.621	1	75	0.2807	4.85691		14.61	10.49	755.5	386	26.32	41.31	990.418	1	31	0.0385	5.12266
2020	319.396	11	14	1900-01-11 09:30:00		61.76	9.4	663	2409	23.74	46.74	976.714	1	75	0.2807	4.6194		14.61	10.51	755.4	350	26.25	39.63	990.568	1	31	0.0385	4.60317
2020	319.417	11	14	1900-01-11 10:00:00		61.76	9.4	663	2287	23.684	44.82	976.705	1	75	0.2807	4.37794		14.61	10.49	755.3	321	26.2	38.14	990.562	1	31	0.0385	4.1847
2020	319.438	11	14	1900-01-11 10:30:00		61.7	9.4	663	2069	23.698	41.54	976.654	1	75	0.2807	3.94648		14.54	10.49	755.3	308	26.18	35.74	990.489	1	31	0.0385	3.99711
2020	319.458	11	14	1900-01-11 11:00:00		61.83	9.41	663	1657	23.684	39.06	976.688	1	75	0.2807	3.13106		14.67	10.49	755.3	219	26.17	33.74	990.537	1	31	0.0385	2.71284
2020	319.479	11	14	1900-01-11 11:30:00		61.83	9.41	663	1560	23.712	38.64	976.701	1	75	0.2807	2.93908		14.61	10.48	755.3	260	26.16	33.04	990.511	1	31	0.0385	3.30447
2020	319.5	11	14	1900-01-11 12:00:00		61.96	9.41	663	1514	23.698	39.04	976.676	1	75	0.2807	2.84804		14.67	10.51	755.2	209	26.16	33.18	990.515	1	31	0.0385	2.56854
2020	319.521	11	14	1900-01-11 12:30:00		61.83	9.41	663	1544	23.642	37.82	976.507	1	75	0.2807	2.90741		14.61	10.51	755.2	223	26.15	32.33	990.295	1	31	0.0385	2.77056
2020	319.542	11	14	1900-01-11 13:00:00		61.9	9.41	663	1459	23.656	36.96	976.341	1	75	0.2807	2.73918		14.67	10.46	755.1	237	26.15	31.52	990.047	1	31	0.0385	2.97258
2020	319.562	11	14	1900-01-11 13:30:00		61.96	9.41	663	1555	23.628	37.34	976.267	1	75	0.2807	2.92918		14.67	10.47	755.1	245	26.14	31.57	989.913	1	31	0.0385	3.08802
2020	319.583	11	14	1900-01-11 14:00:00		61.9	9.41	663	1622	23.628	37.71	976.178	1	75	0.2807	3.06179		14.61	10.47	755.1	252	26.14	31.73	989.851	1	31	0.0385	3.18903
2020	319.604	11	14	1900-01-11 14:30:00		61.83	9.41	663	1774	23.656	37.98	975.958	1	75	0.2807	3.36263		14.67	10.45	755.1	272	26.13	31.94	989.531	1	31	0.0385	3.47763
2020	319.625	11	14	1900-01-11 15:00:00		61.83	9.4	663	1606	23.6	41.76	975.856	1	75	0.2807	3.03012		14.61	10.47	755.1	240	26.13	34.13	989.37	1	31	0.0385	3.01587
2020	319.646	11	14	1900-01-11 15:30:00		61.83	9.39	663	1473	23.712	48.24	975.889	1	75	0.2807	2.76689		14.61	10.46	755	220	26.24	39.11	989.444	1	31	0.0385	2.72727
2020	319.667	11	14	1900-01-11 16:00:00		61.83	9.38	663	1261	23.824	52.19	975.78	1	75	0.2807	2.34731		14.54	10.45	755.1	219	26.32	42.61	989.289	1	31	0.0385	2.71284
2020	319.688	11	14	1900-01-11 16:30:00		61.76	9.39	663	1150	23.712	54.77	975.96	1	75	0.2807	2.12762		14.61	10.47	755.1	190	26.24	44.86	989.488	1	31	0.0385	2.29437
2020	319.708	11	14	1900-01-11 17:00:00		61.76	9.38	663	1031	23.656	55.84	976.025	1	75	0.2807	1.8921		14.61	10.47	755.1	182	26.35	45.76	989.572	1	31	0.0385	2.17893
2020	319.729	11	14	1900-01-11 17:30:00		61.83	9.39	663	1043	23.88	54.51	976.226	1	75	0.2807	1.91585		14.54	10.45	755.1	167	26.35	45.3	989.84	1	31	0.0385	1.96248
2020	319.75	11	14	1900-01-11 18:00:00		61.83	9.39	663	958	23.558	56.26	976.55	1	75	0.2807	1.74762		14.61	10.45	755.1	141	26.22	46.18	990.224	1	31	0.0385	1.5873
2020	319.771	11	14	1900-01-11 18:30:00		61.83	9.39	663	854	23.922	57.39	976.99	1	75	0.2807	1.54178		14.61	10.46	755.1	160	26.43	47.5	990.8	1	31	0.0385	1.86147
2020	319.792	11	14	1900-01-11 19:00:00		61.83	9.4	663	816	23.614	58.73	977.514	1	75	0.2807	1.46657		14.61	10.45	755.1	143	26.21	48.46	991.446	1	31	0.0385	1.61616
2020	319.812	11	14	1900-01-11 19:30:00		61.83	9.41	663.1	791	24.132	57.07	978.124	1	75	0.2807	1.41709		14.54	10.47	755.2	140	26.52	47.85	992.252	1	31	0.0385	1.57287
2020	319.833	11	14	1900-01-11 20:00:00		61.9	9.4	663	858	23.712	57.59	978.542	1	75	0.2807	1.5497		14.61	10.49	755.1	129	26.5	47.46	992.823	1	31	0.0385	1.41414
2020	319.854	11	14	1900-01-11 20:30:00		61.83	9.42	663	820	23.74	58.5	978.894	1	75	0.2807	1.47449		14.54	10.48	755.1	142	26.29	48.44	993.288	1	31	0.0385	1.60173
2020	319.875	11	14	1900-01-11 21:00:00		61.9	9.42	663.2	812	24.146	58.94	979.196	1	75	0.2807	1.45865		14.61	10.49	755.1	134	26.61	49.12	993.667	1	31	0.0385	1.48629
2020	319.896	11	14	1900-01-11 21:30:00		62.03	9.42	663.5	809	24.37	59.17	979.617	1	75	0.2807	1.45272		14.61	10.53	755.2	124	26.82	49.48	994.182	1	31	0.0385	1.34199
2020	319.917	11	14	1900-01-11 22:00:00		62.03	9.41	663.1	829	23.754	61.2	979.95	1	75	0.2807	1.4923		14.67	10.53	755.2	132	26.63	50.12	994.639	1	31	0.0385	1.45743
2020	319.938	11	14	1900-01-11 22:30:00		61.9	9.42	663	811	23.726	61.69	980.287	1	75	0.2807	1.45668		14.67	10.51	755.1	129	26.36	50.91	995.085	1	31	0.0385	1.41414
2020	319.958	11	14	1900-01-11 23:00:00		62.03	9.42	663.1	894	24.118	61.15	980.479	1	75	0.2807	1.62095		14.61	10.51	755.1	156	26.61	50.88	995.364	1	31	0.0385	1.80375
2020	319.979	11	14	1900-01-11 23:30:00		62.1	9.42	663.4	994	24.286	60.58	980.526	1	75	0.2807	1.81887		14.67	10.54	755.1	162	26.79	50.6	995.449	1	31	0.0385	1.89033
2020	320	11	15	1900-01-12		62.1	9.43	663.5	1041	24.398	60	980.623	1	75	0.2807	1.91189		14.67	10.56	755.1	188	26.9	50.19	995.56	1	31	0.0385	2.26551
2020	320.021	11	15	1900-01-12 00:30:00		62.1	9.43	663.6	1052	24.426	59.18	980.631	1	75	0.2807	1.93366		14.61	10.57	755.2	222	26.96	49.49	995.6	1	31	0.0385	2.75613
2020	320.042	11	15	1900-01-12 01:00:00		62.1	9.42	663.6	1278	24.426	58.25	980.494	1	75	0.2807	2.38095		14.67	10.57	755.2	210	26.96	48.68	995.427	1	31	0.0385	2.58297
2020	320.062	11	15	1900-01-12 01:30:00		62.1	9.42	663.6	1218	24.412	58.29	980.414	1	75	0.2807	2.2622		14.81	10.57	755.2	3443	26.97	48.45	995.329	0	31	0.0385	49.2352
2020	320.083	11	15	1900-01-12 02:00:00		62.1	9.42	663.5	1363	24.37	57.8	980.303	1	75	0.2807	2.54918		14.81	10.55	755.2	7970	26.96	47.77	995.182	0	31	0.0385	114.56
2020	320.104	11	15	1900-01-12 02:30:00		62.03	9.42	663.5	1460	24.3	57.15	980.183	1	75	0.2807	2.74116		14.81	10.54	755.2	10108	26.9	47.12	995.057	0	31	0.0385	145.411
2020	320.125	11	15	1900-01-12 03:00:00		62.03	9.42	663.4	1482	24.244	56.97	980.122	1	75	0.2807	2.7847		14.74	10.54	755.1	11498	26.87	46.84	994.94	0	31	0.0385	165.469
2020	320.146	11	15	1900-01-12 03:30:00		61.96	9.42	663.3	1481	24.146	56.56	980.07	1	75	0.2807	2.78273		14.81	10.54	755.2	12659	26.77	46.5	994.866	0	31	0.0385	182.222
2020	320.167	11	15	1900-01-12 04:00:00		62.03	9.42	663.1	1454	24.062	55.93	980.096	1	75	0.2807	2.72929		14.74	10.52	755.1	12866	26.65	46.02	994.885	0	31	0.0385	185.209
2020	320.188	11	15	1900-01-12 04:30:00		62.03	9.42	663.1	1706	23.978	55.48	980.089	1	75	0.2807	3.22804		14.81	10.51	755.1	13187	26.56	45.65	994.893	0	31	0.0385	189.841
2020	320.208	11	15	1900-01-12 05:00:00		62.03	9.42	663.1	1688	23.894	54.92	980.118	1	75	0.2807	3.19242		14.81	10.51	755.1	13424	26.46	45.21	994.927	0	31	0.0385	193.261
2020	320.229	11	15	1900-01-12 05:30:00		61.96	9.43	663	1882	23.796	53.96	980.264	1	75	0.2807	3.57638		14.74	10.51	755.1	13458	26.36	44.45	995.127	0	31	0.0385	193.752
2020	320.25	11	15	1900-01-12 06:00:00		61.96	9.44	663	1936	23.712	53.92	980.597	1	75	0.2807	3.68325		14.74	10.54	755.1	13469	26.27	44.35	995.547	0	31	0.0385	193.911
2020	320.271	11	15	1900-01-12 06:30:00		61.96	9.44	663	1934	23.754	53.8	980.819	1	75	0.2807	3.67929		14.81	10.54	755	13588	26.21	44.43	995.837	0	31	0.0385	195.628
2020	320.292	11	15	1900-01-12 07:00:00		61.96	9.45	663.2	1980	24.286	52.8	980.968	1	75	0.2807	3.77034		14.67	10.51	755.2	13501	26.44	44.35	996.038	0	31	0.0385	194.372
2020	320.312	11	15	1900-01-12 07:30:00		61.9	9.44	663.1	2064	24.048	53.62	981.198	1	75	0.2807	3.93659		14.67	10.53	755.2	10176	26.48	44.78	996.279	0	31	0.0385	146.393
2020	320.333	11	15	1900-01-12 08:00:00		61.83	9.44	663	2142	23.992	55.59	981.485	1	75	0.2807	4.09096		14.61	10.54	755.3	5924	26.41	46.36	996.651	0	31	0.0385	85.0361
2020	320.354	11	15	1900-01-12 08:30:00		61.83	9.44	663	2007	23.936	57.86	981.653	1	75	0.2807	3.82377		14.61	10.52	755.3	3742	26.34	48.23	996.933	0	31	0.0385	53.5498
2020	320.375	11	15	1900-01-12 09:00:00		61.83	9.44	663	1692	23.894	58.51	981.692	1	75	0.2807	3.20033		14.61	10.51	755.3	2091	26.3	48.9	997.053	0	31	0.0385	29.7258
2020	320.396	11	15	1900-01-12 09:30:00		61.7	9.44	663	1504	23.838	58.97	981.435	1	75	0.2807	2.82825		14.61	10.52	755.3	1263	26.27	49.29	996.7	0	31	0.0385	17.7778
2020	320.417	11	15	1900-01-12 10:00:00		61.7	9.44	663	1508	23.824	59.05	981.633	1	75	0.2807	2.83616		14.54	10.51	755.3	762	26.24	49.46	996.876	0	31	0.0385	10.5483
2020	320.438	11	15	1900-01-12 10:30:00		61.7	9.44	663	1653	23.81	58.74	981.757	1	75	0.2807	3.12314		14.61	10.51	755.3	536	26.22	49.35	997.101	0	31	0.0385	7.28716
2020	320.458	11	15	1900-01-12 11:00:00		61.76	9.44	663	1685	23.754	57.64	981.759	1	75	0.2807	3.18648		14.61	10.51	755.2	412	26.2	48.51	997.113	0	31	0.0385	5.49784
2020	320.479	11	15	1900-01-12 11:30:00		61.63	9.45	663	1540	23.712	55.33	981.681	1	75	0.2807	2.8995		14.54	10.52	755.2	334	26.16	46.78	997.017	0	31	0.0385	4.37229
2020	320.5	11	15	1900-01-12 12:00:00		61.76	9.44	663	1576	23.74	52.72	981.425	1	75	0.2807	2.97075		14.61	10.52	755.3	278	26.19	44.71	996.706	0	31	0.0385	3.56421
2020	320.521	11	15	1900-01-12 12:30:00		61.7	9.44	663	1531	23.698	50.95	981.26	1	75	0.2807	2.88168		14.54	10.52	755.3	285	26.21	43.22	996.474	0	31	0.0385	3.66522
2020	320.542	11	15	1900-01-12 13:00:00		61.7	9.44	663	1526	23.656	48.23	981.033	1	75	0.2807	2.87179		14.61	10.51	755.2	237	26.21	40.97	996.199	1	31	0.0385	2.97258
2020	320.562	11	15	1900-01-12 13:30:00		61.76	9.45	663	1411	23.656	44.73	980.688	1	75	0.2807	2.64418		14.54	10.51	755.3	235	26.21	38.28	995.787	1	31	0.0385	2.94372
2020	320.583	11	15	1900-01-12 14:00:00		61.63	9.45	663	1328	23.712	42.72	980.362	1	75	0.2807	2.47991		14.54	10.51	755.3	209	26.23	36.34	995.345	1	31	0.0385	2.56854
2020	320.604	11	15	1900-01-12 14:30:00		61.63	9.44	663	1272	23.782	48.54	980.325	1	75	0.2807	2.36908		14.54	10.5	755.2	218	26.27	40.15	995.205	1	31	0.0385	2.69841
2020	320.625	11	15	1900-01-12 15:00:00		61.7	9.43	663	1337	23.726	55.52	980.287	1	75	0.2807	2.49772		14.54	10.49	755.3	204	26.27	45.6	995.235	1	31	0.0385	2.49639
2020	320.646	11	15	1900-01-12 15:30:00		61.63	9.42	663	1300	23.726	59.3	980.247	1	75	0.2807	2.42449		14.54	10.5	755.3	231	26.3	48.91	995.144	1	31	0.0385	2.886
2020	320.667	11	15	1900-01-12 16:00:00		61.63	9.42	663	1298	23.782	60.82	980.148	1	75	0.2807	2.42054		14.54	10.48	755.3	221	26.34	50.35	995.063	1	31	0.0385	2.7417
2020	320.688	11	15	1900-01-12 16:30:00		61.7	9.42	663	1329	23.768	62.35	980.074	1	75	0.2807	2.48189		14.54	10.5	755.3	252	26.32	51.73	994.907	1	31	0.0385	3.18903
2020	320.708	11	15	1900-01-12 17:00:00		61.56	9.42	663	1493	23.782	62.82	980.058	1	75	0.2807	2.80648		14.47	10.47	755.3	253	26.32	52.31	994.886	1	31	0.0385	3.20346
2020	320.729	11	15	1900-01-12 17:30:00		61.63	9.42	663	1521	23.782	63.3	980.145	1	75	0.2807	2.86189		14.54	10.51	755.3	240	26.31	52.69	994.993	1	31	0.0385	3.01587
2020	320.75	11	15	1900-01-12 18:00:00		61.63	9.42	663	1561	23.754	65.17	980.231	1	75	0.2807	2.94106		14.61	10.51	755.4	267	26.37	54.04	995.107	1	31	0.0385	3.40548
2020	320.771	11	15	1900-01-12 18:30:00		61.7	9.41	663	1490	23.782	66.81	980.31	1	75	0.2807	2.80054		14.54	10.52	755.4	237	26.41	55.5	995.225	1	31	0.0385	2.97258
2020	320.792	11	15	1900-01-12 19:00:00		61.7	9.41	663	1480	23.838	66.55	980.309	1	75	0.2807	2.78075		14.54	10.51	755.4	239	26.43	55.49	995.22	1	31	0.0385	3.00144
2020	320.812	11	15	1900-01-12 19:30:00		61.63	9.42	663	1434	23.754	64.46	980.426	1	75	0.2807	2.6897		14.54	10.5	755.4	250	26.34	53.8	995.334	1	31	0.0385	3.16017
2020	320.833	11	15	1900-01-12 20:00:00		61.76	9.42	663	1423	23.614	62.53	980.632	1	75	0.2807	2.66793		14.61	10.5	755.3	223	26.37	51.93	995.625	1	31	0.0385	2.77056
2020	320.854	11	15	1900-01-12 20:30:00		61.83	9.43	663	1362	23.908	60.71	980.905	1	75	0.2807	2.5472		14.54	10.51	755.3	209	26.45	50.95	995.942	1	31	0.0385	2.56854
2020	320.875	11	15	1900-01-12 21:00:00		61.76	9.44	663	1389	23.544	59.89	981.262	1	75	0.2807	2.60064		14.61	10.51	755.4	207	26.32	49.83	996.382	1	31	0.0385	2.53968
2020	320.896	11	15	1900-01-12 21:30:00		61.9	9.44	663	1299	23.922	56.23	981.52	1	75	0.2807	2.42252		14.61	10.51	755.3	219	26.51	47.39	996.759	1	31	0.0385	2.71284
2020	320.917	11	15	1900-01-12 22:00:00		61.83	9.45	663	1303	23.558	55.4	981.643	1	75	0.2807	2.43043		14.54	10.51	755.3	229	26.24	46.31	996.924	1	31	0.0385	2.85714
2020	320.938	11	15	1900-01-12 22:30:00		61.9	9.44	663	1229	23.852	53.52	981.683	1	75	0.2807	2.28397		14.61	10.51	755.3	202	26.5	44.92	996.973	1	31	0.0385	2.46753
2020	320.958	11	15	1900-01-12 23:00:00		61.9	9.46	663	1317	23.642	53.35	981.664	1	75	0.2807	2.45814		14.61	10.51	755.2	211	26.28	44.63	997.008	1	31	0.0385	2.5974
2020	320.979	11	15	1900-01-12 23:30:00		61.9	9.45	663	1471	23.894	52.76	981.589	1	75	0.2807	2.76293		14.61	10.49	755.3	238	26.56	44.12	996.864	1	31	0.0385	2.98701
2020	321	11	16	1900-01-13		61.9	9.45	663	1433	23.572	53.65	981.352	1	75	0.2807	2.68773		14.61	10.5	755.3	240	26.29	44.63	996.622	1	31	0.0385	3.01587
2020	321.021	11	16	1900-01-13 00:30:00		61.9	9.45	663.1	1588	24.174	52.56	981.104	1	75	0.2807	2.9945		14.61	10.51	755.4	262	26.64	44.24	996.303	1	31	0.0385	3.33333
2020	321.042	11	16	1900-01-13 01:00:00		61.9	9.43	663.1	1688	23.684	53.57	980.764	1	75	0.2807	3.19242		14.61	10.52	755.4	276	26.57	44.29	995.868	1	31	0.0385	3.53535
2020	321.062	11	16	1900-01-13 01:30:00		61.83	9.44	663	1761	23.824	53.58	980.411	1	75	0.2807	3.3369		14.54	10.49	755.4	295	26.46	44.58	995.431	1	31	0.0385	3.80952
2020	321.083	11	16	1900-01-13 02:00:00		61.96	9.44	663.2	1897	24.258	53.09	980.088	1	75	0.2807	3.60606		14.61	10.49	755.4	317	26.76	44.54	994.995	1	31	0.0385	4.12698
2020	321.104	11	16	1900-01-13 02:30:00		61.96	9.42	663.1	2101	23.796	54.16	979.825	1	75	0.2807	4.00982		14.67	10.51	755.4	316	26.71	44.61	994.606	1	31	0.0385	4.11255
2020	321.125	11	16	1900-01-13 03:00:00		61.96	9.43	663	2055	23.852	54.14	979.621	1	75	0.2807	3.91877		14.61	10.49	755.4	310	26.49	44.97	994.358	1	31	0.0385	4.02597
2020	321.146	11	16	1900-01-13 03:30:00		62.03	9.43	663.2	2110	24.3	53.48	979.405	1	75	0.2807	4.02763		14.61	10.49	755.4	327	26.84	44.73	994.045	1	31	0.0385	4.27128
2020	321.167	11	16	1900-01-13 04:00:00		61.96	9.41	663.1	2148	23.712	55.14	979.284	1	75	0.2807	4.10284		14.61	10.5	755.5	339	26.68	45.2	993.886	1	31	0.0385	4.44444
2020	321.188	11	16	1900-01-13 04:30:00		61.9	9.43	663	2195	23.824	55.28	979.013	1	75	0.2807	4.19586		14.61	10.46	755.4	343	26.52	45.75	993.596	1	31	0.0385	4.50216
2020	321.208	11	16	1900-01-13 05:00:00		61.9	9.43	663.2	2369	24.216	54.73	979.016	1	75	0.2807	4.54024		14.61	10.49	755.4	385	26.81	45.62	993.481	1	31	0.0385	5.10823
2020	321.229	11	16	1900-01-13 05:30:00		61.9	9.43	663.4	2452	24.412	54.22	979.585	1	75	0.2807	4.70451		14.54	10.53	755.4	369	27.01	45.32	994.149	1	31	0.0385	4.87734
2020	321.25	11	16	1900-01-13 06:00:00		62.1	9.43	663.6	2499	24.496	53.68	979.537	1	75	0.2807	4.79753		14.61	10.57	755.4	333	27.14	44.89	994.197	1	31	0.0385	4.35786
2020	321.271	11	16	1900-01-13 06:30:00		62.03	9.42	663.6	2513	24.552	53.51	979.244	1	75	0.2807	4.82524		14.61	10.57	755.4	413	27.22	44.64	993.864	1	31	0.0385	5.51227
2020	321.292	11	16	1900-01-13 07:00:00		61.76	9.41	663.1	2671	23.978	55.15	978.952	1	75	0.2807	5.13795		14.54	10.54	755.5	435	26.89	45.26	993.493	1	31	0.0385	5.82973
2020	321.312	11	16	1900-01-13 07:30:00		61.76	9.41	663	2745	23.964	56.1	978.86	1	75	0.2807	5.28441		14.61	10.51	755.5	450	26.65	46.14	993.343	1	31	0.0385	6.04618
2020	321.333	11	16	1900-01-13 08:00:00		61.76	9.41	663	2906	23.852	57.88	978.623	1	75	0.2807	5.60306		14.54	10.51	755.5	432	26.49	47.54	993.069	1	31	0.0385	5.78644
2020	321.354	11	16	1900-01-13 08:30:00		61.76	9.41	663	3091	23.838	59.41	978.783	1	75	0.2807	5.9692		14.61	10.51	755.5	457	26.4	49.04	993.235	1	31	0.0385	6.14719
2020	321.375	11	16	1900-01-13 09:00:00		61.76	9.41	663	3147	23.894	60.54	978.71	1	75	0.2807	6.08004		14.54	10.5	756	557	26.48	50.22	993.285	1	31	0.0385	7.59019
2020	321.396	11	16	1900-01-13 09:30:00		61.63	9.41	663	3234	23.95	60.88	978.233	1	75	0.2807	6.25223		14.54	10.46	756	504	26.47	50.75	992.686	1	31	0.0385	6.8254

## Sheet: Liverpool Girls High School AQ
Year	Month	dDay	DOM	HOD	T(C)	Pressure	Wd_deg	SD_WD	WS_ms	RH	CO_ppm	NO_pphm	NO2_pphm	O3_pphm	PM10_ugm3	PM2.5_ugm3	NEPH_bsp	Radon	Fetch	Mixing	MixingClass
2019	5	1	1	0	17.8	996.983	118.9	77.37	0.2	85.2	0.3	3.3	2.1	-0.2	18	8.7	0.26	8.84611	3.6455	5.2006	3
2019	5	1.04167	1	1	16.5	996.767	111.6	82.3	0.1	91.6	0.3	3.5	1.8	-0.2	19.8	7.9	0.26	11.0974	3.822	7.2754	3
2019	5	1.08333	1	2	16	996.765	147.9	74.62	0.2	91.9	0.2	3.15	-9999	-9999	19.5	7.5	0.31	12.8927	3.9985	8.8943	3
2019	5	1.125	1	3	15.4	996.723	133.5	65.32	0.2	93	0.1	2.8	1.5	-9999	23.8	11.1	0.32	14.8885	4.175	10.7135	3
2019	5	1.16667	1	4	15.1	996.703	95	79.53	0.2	93.8	0.1	5.2	1.3	-0.1	22.9	10.9	0.3	16.5619	4.3515	12.2105	3
2019	5	1.20833	1	5	15	996.999	73.2	68.16	0.2	93	0.2	6	1.3	-0.1	16.1	5.7	0.27	16.5706	4.5279	12.0427	3
2019	5	1.25	1	6	15.5	997.405	315.8	56.78	0.3	90.5	0.3	8.2	1.5	-0.1	20.6	11.4	0.3	17.8859	4.7044	13.1815	3
2019	5	1.29167	1	7	15.3	997.966	37	44.62	0.3	91.2	0.7	13.7	1.8	0	25	13.7	0.48	16.3325	4.8809	11.4516	3
2019	5	1.33333	1	8	15.8	998.571	26.8	24.27	0.6	90.4	0.6	13.4	1.9	0	33.6	15.5	0.4	13.1298	5.0574	8.0724	3
2019	5	1.375	1	9	17.1	998.906	11.4	24.59	1.1	86.6	0.5	9	2.1	0	27.3	13.7	0.47	10.3443	5.2339	5.1104	3
2019	5	1.41667	1	10	18	999.061	2.9	37.68	1.2	82.2	0.3	5.7	2	0.1	31	15.9	0.6	9.80714	5.4104	4.3968	3
2019	5	1.45833	1	11	18.9	998.865	346.9	25.79	1.1	76.6	0.2	1.7	1.7	0.4	31.6	16.8	0.67	10.051	5.5868	4.4642	3
2019	5	1.5	1	12	19.5	998.434	2.2	38.79	0.9	72.6	0.3	1.3	1.6	0.5	34.6	20.5	0.88	9.10542	5.7633	3.3421	3
2019	5	1.54167	1	13	20.9	997.908	8	29.72	1.4	67.2	0.2	1.1	1.3	1	38.6	23.9	-9999	7.36519	5.9398	1.4254	3
2019	5	1.58333	1	14	23.3	997.557	7	27.57	2	60.2	0.1	0.5	0.5	1.6	28.4	16	0.3	6.45345	6.1163	0.3372	3
2019	5	1.625	1	15	24.4	997.399	9.2	21.29	2.4	56.2	0.1	0.3	0.4	1.8	23.5	10.8	0.18	6.29278	6.2928	0	4
2019	5	1.66667	1	16	24.1	997.31	17.2	18.23	2.5	57.9	0.1	0.2	0.6	1.8	20.5	9.6	0.16	6.30826	6.1994	0.1089	4
2019	5	1.70833	1	17	23.3	997.329	24.9	28.09	1.6	60.9	0.1	0.2	1.2	1.2	14.8	6.5	0.19	6.81058	6.106	0.7046	4
2019	5	1.75	1	18	22.1	997.19	60.5	20.74	1.5	69.3	0.2	0.4	1.7	0.3	19.3	10.2	0.23	6.73604	6.0126	0.7235	4
2019	5	1.79167	1	19	21.1	998.203	37.3	49.89	0.7	74.2	0.2	0.8	1.9	-0.1	14.1	5.2	0.17	7.76391	5.9192	1.8448	4
2019	5	1.83333	1	20	20.3	998.442	59.3	76.41	0.2	78	0.3	2.7	2	-0.1	12.4	2.4	0.21	8.79565	5.8258	2.9699	4
2019	5	1.875	1	21	19.1	998.877	28.1	44.2	0.2	84	0.4	3.4	1.9	-0.1	18.7	7.5	0.25	9.82546	5.7323	4.0931	4
2019	5	1.91667	1	22	18.5	999.281	1	28.44	0.3	86.9	0.4	6.4	1.9	-0.1	29.4	13	0.32	11.044	5.6389	5.4051	4
2019	5	1.95833	1	23	17.9	999.213	348.9	88.05	0.1	88.7	0.4	5.5	1.8	-0.2	25.1	9	0.29	12.4445	5.5455	6.899	4
2019	5	2	2	0	17.6	999.25	154.7	75.79	0.2	89.4	0.5	5.8	1.6	-0.1	21.1	8.8	0.33	14.7722	5.4521	9.3201	4
2019	5	2.04167	2	1	17.7	999.222	171.7	84.68	0.2	88.3	0.4	7	1.5	-0.1	30.8	13.4	0.37	15.532	5.3587	10.1732	4
2019	5	2.08333	2	2	17.6	999.103	139.5	92.03	0.1	88	0.35	7.35	-9999	-9999	25	13	0.28	16.6653	5.2653	11.4	4
2019	5	2.125	2	3	17.4	998.973	105.4	81.43	0.1	88.8	0.3	7.7	1.7	-9999	18.1	9.2	0.27	19.266	5.1719	14.0941	4
2019	5	2.16667	2	4	16.5	998.914	22.6	50.05	0.2	92.1	0.4	11.5	1.4	-0.2	22.2	12.7	0.33	20.6036	5.0785	15.5251	4
2019	5	2.20833	2	5	16.5	999.141	7.8	65.4	0.2	92.1	0.4	8.9	1.4	-0.2	22.7	11.8	0.3	18.9795	4.9851	13.9944	4
2019	5	2.25	2	6	16.8	999.518	251.5	63.97	0.4	90.7	0.4	8.7	1.5	-0.2	24.1	14	0.88	18.9185	4.8917	14.0268	4
2019	5	2.29167	2	7	16.8	999.998	302.5	68.4	0.4	89.6	0.4	8.2	1.5	-0.2	25.3	16.1	0.31	20.0112	4.7983	15.2129	4
2019	5	2.33333	2	8	17.2	1000.54	233.9	87.57	0.2	87.4	0.5	11.6	1.8	-0.2	22.2	12.1	0.38	19.5205	4.7049	14.8156	4
2019	5	2.375	2	9	18	1001.13	342	65.34	0.6	85.1	0.5	10.9	1.8	-0.2	30.3	16.1	0.41	16.1591	4.6115	11.5476	4
2019	5	2.41667	2	10	19.8	1001	14.1	57.93	0.5	78.9	0.4	6.2	1.9	-0.1	28	15	0.51	12.8277	4.5181	8.3096	4
2019	5	2.45833	2	11	21.9	1000.89	357.2	43.22	1	72.9	0.3	4.8	2.2	0.2	33.5	18.2	0.61	10.3316	4.4247	5.9069	4
2019	5	2.5	2	12	24	1000.21	353.8	56.96	0.7	65.1	0.2	2.2	1.9	0.8	36.8	18.6	0.48	7.89834	4.3313	3.5671	4
2019	5	2.54167	2	13	25.4	999.298	3.3	50.03	0.9	59.7	0.1	0.5	1	1.9	30.2	15.3	0.34	5.81645	4.2379	1.5786	4
2019	5	2.58333	2	14	25.8	998.656	29.8	40.85	1.5	55.9	0.1	0.2	0.5	2.1	20.3	9.5	0.25	4.62403	4.1445	0.4796	4
2019	5	2.625	2	15	24.8	998.52	67.1	27.94	1.7	65.3	0.2	0.5	1.4	1.2	22.7	12	0.4	4.05105	4.0511	0	3
2019	5	2.66667	2	16	24.3	998.193	69.2	32.9	1.4	68.1	0.1	0.5	1.3	1.1	30.2	13.4	0.42	4.17783	4.0767	0.1011	3
2019	5	2.70833	2	17	24	998.249	38.9	28.12	1.7	67.2	0.1	0.2	1.2	1	26.2	13.4	0.21	4.63176	4.1023	0.5294	3
2019	5	2.75	2	18	22.5	998.205	59.5	20.26	0.9	72.9	0.3	0.8	1.9	0.2	18.8	7.1	0.21	5.2899	4.128	1.1619	3
2019	5	2.79167	2	19	21.3	998.311	58.5	32.17	0.5	75.4	0.3	2.2	2.3	-0.2	21.7	7.9	0.34	6.0758	4.1536	1.9222	3
2019	5	2.83333	2	20	20.6	998.312	65.6	43.93	0.4	80.2	0.3	2.6	2.2	-9999	24.8	11.9	0.31	6.86074	4.1793	2.6815	3
2019	5	2.875	2	21	20.1	998.053	99.1	72	0.3	83.7	0.4	3.8	2.1	-9999	20.6	9.1	0.33	7.29627	4.2049	3.0914	3
2019	5	2.91667	2	22	19.5	998.154	3.9	56.48	0.2	86.5	0.3	3.1	2.1	-9999	21.5	8.6	0.32	8.51578	4.2305	4.2852	3
2019	5	2.95833	2	23	19	998.074	50.6	98.15	0	88.6	0.4	4.6	1.9	-9999	22.4	10.9	0.33	10.1234	4.2562	5.8672	3
2019	5	3	3	0	18.4	997.732	7.2	74.55	0.1	90.9	0.4	5.4	1.8	-9999	21.3	9.1	0.32	13.1218	4.2818	8.84	3
2019	5	3.04167	3	1	17.6	997.133	102.8	41.19	0.4	92.2	0.4	6.7	1.6	-0.2	24.2	12.2	0.34	14.6307	4.3075	10.3233	3
2019	5	3.08333	3	2	17	996.598	23.9	70.02	0.2	95.1	0.35	5.35	-9999	-9999	20.5	8.6	0.28	14.3965	4.3331	10.0634	3
2019	5	3.125	3	3	17.2	996.29	6.7	72.18	0.1	95.6	0.3	4	1.5	-9999	16.8	7.1	0.28	15.3779	4.3588	11.0192	3
2019	5	3.16667	3	4	16.8	995.826	166.5	101.23	0.2	96	0.3	5.6	1.3	-0.2	15.6	5.8	0.35	15.2521	4.3844	10.8677	3
2019	5	3.20833	3	5	16.9	995.597	81.1	90.12	0.2	95.6	0.3	6.1	1.3	-0.2	24.8	10.3	0.32	13.7238	4.41	9.3138	3
2019	5	3.25	3	6	17.4	995.608	269.3	56.16	0.4	93.2	0.4	5.4	1.3	-0.2	21.9	10.1	0.32	15.2124	4.4357	10.7767	3
2019	5	3.29167	3	7	17.1	995.358	15.1	83.01	0.2	93.2	0.6	9.5	1.5	-0.2	23.2	11.9	0.36	16.7658	4.4613	12.3045	3
2019	5	3.33333	3	8	17.6	995.621	149.5	51.6	0.3	92	0.6	12.2	1.6	-0.2	27	13.2	0.42	14.4342	4.487	9.9473	3
2019	5	3.375	3	9	19.3	995.598	29.1	35.65	0.7	84.5	0.5	10.1	1.8	-0.2	35.9	18	0.38	10.0382	4.5126	5.5256	3
2019	5	3.41667	3	10	22.1	995.267	4.5	21.29	2.3	69	0.1	1.1	0.9	0.6	26	12.5	0.19	7.62914	4.5383	3.0909	3
2019	5	3.45833	3	11	23.2	995.039	332.4	33.28	1.1	61.8	0.1	0.4	0.8	0.9	18.6	6.7	0.17	7.36974	4.5639	2.8058	3
2019	5	3.5	3	12	22.3	995.173	311.1	38.57	0.9	68.4	0.2	1	1.3	0.4	17.8	6	0.23	7.72591	4.5895	3.1364	3
2019	5	3.54167	3	13	18.9	994.531	359.5	23.74	1.9	90.3	0.1	0.4	1.1	0.5	16.6	5.4	0.22	7.47135	4.6152	2.8562	3
2019	5	3.58333	3	14	18.8	994.175	3.6	14.21	1.9	93.2	0.2	0.5	1.1	0.5	9.9	4.4	0.22	7.03484	4.6408	2.394	3
2019	5	3.625	3	15	18.9	993.983	13.4	15.94	1.6	92.4	0.1	0.5	1.2	0.4	11.4	6.5	0.21	5.92179	4.6665	1.2553	2
2019	5	3.66667	3	16	19.4	993.555	9.2	17.28	2	88.7	0.1	0.4	0.8	0.7	12.1	7.2	0.16	4.90359	4.6921	0.2115	2
2019	5	3.70833	3	17	19.5	993.351	12.5	15.6	2.2	85.7	0.1	0.2	0.8	0.8	8.4	4.8	0.13	4.71775	4.7177	0	2
2019	5	3.75	3	18	19.3	993.467	9.7	14.48	1.7	86	0.2	0.2	1.2	0.3	8.8	4.8	0.15	5.24813	4.6564	0.5917	2
2019	5	3.79167	3	19	19.4	993.525	1.1	55.13	0.6	85.1	0.2	0.3	1.3	0.1	6.6	1.9	0.15	5.34491	4.5951	0.7498	2
2019	5	3.83333	3	20	19.6	993.366	6.3	59.99	0.7	83.1	0.1	0.2	0.8	0.4	6.8	2.2	0.12	5.77658	4.5338	1.2427	2
2019	5	3.875	3	21	19.1	993.459	1.8	26.34	0.8	84.3	0.1	0	0.5	0.7	5.1	0.1	0.11	5.47847	4.4725	1.0059	2
2019	5	3.91667	3	22	18.9	993.482	291.3	61.5	0.3	85.5	0.1	0	0.5	0.6	3.6	-0.4	0.1	5.16874	4.4112	0.7575	2
2019	5	3.95833	3	23	18.7	993.259	248.1	40.64	0.5	86.8	0.1	0.1	0.6	0.4	5.7	2.6	0.08	6.05434	4.3499	1.7044	2
2019	5	4	4	0	18.5	992.997	227.9	41.07	0.5	88.9	0.2	0.7	1.1	-0.1	6.6	3.2	0.14	7.55936	4.2886	3.2707	2
2019	5	4.04167	4	1	18	992.505	253.8	69.69	0.3	92	0.2	1.8	1.1	-0.2	8.3	4	0.24	8.63949	4.2273	4.4122	2
2019	5	4.08333	4	2	17.9	992.427	295.3	80.76	0.3	93.1	0.2	1.6	-9999	-9999	6.8	2.1	0.27	10.2849	4.166	6.1189	2
2019	5	4.125	4	3	17.7	992.348	336.8	71.88	0.2	93.8	0.2	1.4	0.9	-9999	10.8	5.8	0.32	11.9873	4.1047	7.8826	2
2019	5	4.16667	4	4	17.5	992.485	71	77.58	0.1	93.9	0.2	2	0.9	-0.2	10.6	5.5	0.36	10.6207	4.0434	6.5773	2
2019	5	4.20833	4	5	17.7	992.304	195.4	62.65	0.6	77.3	0.1	0.3	1.2	0.4	11.6	6.2	0.19	8.56107	3.9821	4.579	2
2019	5	4.25	4	6	17.2	992.824	187.1	56.17	0.6	69.1	0.1	0.9	1.2	0.9	6.3	2.4	0.12	6.53629	3.9208	2.6155	2
2019	5	4.29167	4	7	17	993.317	244.4	49.16	0.6	64.2	0.1	0.5	1.5	0.8	7.2	3.1	0.08	5.62842	3.8595	1.7689	2
2019	5	4.33333	4	8	16.5	993.622	211.7	50.76	0.6	65.9	0.1	2.7	2.1	0.4	9.6	4.9	0.09	5.53647	3.7982	1.7383	2
2019	5	4.375	4	9	17.1	994.064	180.4	46.08	0.7	62.8	0.1	3	2	0.6	9	3.4	0.11	5.45807	3.7369	1.7212	2
2019	5	4.41667	4	10	17.5	993.945	223.9	46.6	1.1	57.6	0.1	2.1	1.4	1.4	7	1.8	0.08	5.44645	3.6756	1.7709	2
2019	5	4.45833	4	11	18.4	993.298	239.2	37.25	1.6	49.5	0.1	0.2	0.3	2.2	6.1	1.9	0.05	4.54245	3.6143	0.9282	2
2019	5	4.5	4	12	20.4	992.567	216.5	56.9	1.3	38.2	0.1	1.3	0.8	2.1	6.5	2.7	0.05	3.84655	3.553	0.2936	2
2019	5	4.54167	4	13	21.9	992.134	213.6	58.62	1.1	34.9	0.1	1.2	1	2.3	8.8	4.9	0.05	3.60748	3.4917	0.1158	2
2019	5	4.58333	4	14	22.5	992.021	244.7	57.69	1.1	35.6	0.1	0.7	0.6	2.7	9.8	6.2	0.05	3.43035	3.4304	0	2
2019	5	4.625	4	15	21.4	991.899	123.3	38.9	1.5	37.7	0	0.5	0.4	2.7	7.3	4.1	0.05	3.44196	3.3282	0.1138	2
2019	5	4.66667	4	16	20.5	992.258	147.1	42.78	1.2	40.7	0.1	0.1	0.3	2.9	5.7	2.6	0.07	3.70618	3.226	0.4801	2
2019	5	4.70833	4	17	19.4	992.727	155.9	38.44	1.1	49.3	0	0.1	0.2	2.6	5	0.7	0.07	3.73812	3.1239	0.6142	2
2019	5	4.75	4	18	18.5	993.563	191.5	56.6	0.7	53.6	0.1	0.3	0.9	1.8	8.1	3.3	0.07	3.4313	3.0217	0.4096	2
2019	5	4.79167	4	19	17.6	994.297	220	64.71	0.5	51.6	0.1	0.1	0.8	1.6	8.3	3.2	0.07	3.40806	2.9196	0.4885	2
2019	5	4.83333	4	20	17.2	994.661	233.9	48.12	1.2	50.9	0.1	0.1	1.1	1.4	6.5	2.9	0.1	3.90264	2.8174	1.0852	2
2019	5	4.875	4	21	16.3	994.995	237.5	51.24	1	57.9	0.1	0	0.7	1.6	6	3.1	0.06	4.55884	2.7153	1.8436	2
2019	5	4.91667	4	22	15.6	995.231	242.1	35.85	1.5	64.5	0.1	0	0.6	1.6	4.6	2.3	0.07	5.11826	2.6131	2.5052	2
2019	5	4.95833	4	23	15.3	995.144	246.9	36.01	1	66.4	0.1	0	0.8	1.3	5.3	3.5	0.07	5.63897	2.5109	3.128	2
2019	5	5	5	0	15	994.97	238.5	50.31	0.7	67.2	0.1	0	0.9	1.1	4.2	2.4	0.07	6.05708	2.4088	3.6483	2
2019	5	5.04167	5	1	14.3	994.954	240.6	51.17	0.8	69.8	0.1	0	1	0.9	5.6	3.7	0.07	6.21774	2.3066	3.9111	2
2019	5	5.08333	5	2	13.6	994.949	228.4	45.98	0.8	71.3	0.1	0	-9999	-9999	4.6	2.3	0.07	6.71619	2.2045	4.5117	2
2019	5	5.125	5	3	13	994.859	249.2	37.05	1.2	72.8	0.1	0	0.7	0.8	2.9	0.9	0.07	7.56403	2.1023	5.4617	2
2019	5	5.16667	5	4	12.5	994.797	248.2	31.29	1.2	74.2	0.1	0	0.6	1	4.9	2.9	0.07	8.36348	2.0002	6.3633	2
2019	5	5.20833	5	5	11.7	994.828	245.6	49.58	0.6	76.5	0.1	0	0.8	0.7	4	2.4	0.08	8.51156	1.898	6.6136	2
2019	5	5.25	5	6	11.6	995.012	256.7	43.41	0.8	72.6	0.1	0	0.7	0.8	4.2	2.1	0.07	7.69758	1.7958	5.9017	2
2019	5	5.29167	5	7	11.9	995.143	247.3	34.64	0.9	68.1	0.1	0	0.7	1	2.5	0.9	0.06	7.05975	1.6937	5.3661	2
2019	5	5.33333	5	8	12.8	995.361	243.3	33.04	1.2	63.6	0.1	0.2	0.5	1.2	3.1	1.1	0.06	5.68537	1.5915	4.0938	2
2019	5	5.375	5	9	14.8	995.347	238.7	36.92	1.8	55.6	0.1	0.2	0.3	1.6	0.7	-1.4	0.04	4.65072	1.4894	3.1613	2
2019	5	5.41667	5	10	16.3	995.448	236.1	42.02	1.8	53.7	0.1	0.2	0.2	1.8	1.4	-0.7	0.04	3.50669	1.3872	2.1195	2
2019	5	5.45833	5	11	17.9	994.986	216.2	52.34	1.5	52.9	0	0.1	0.2	2	0.8	-1.9	0.04	2.37138	1.2851	1.0863	2
2019	5	5.5	5	12	19.1	994.47	210.6	51.41	1.8	48.4	0	0.1	0.1	2.4	3.5	-0.7	0.03	1.76936	1.1829	0.5864	2
2019	5	5.54167	5	13	19.4	994.037	183.5	41.83	1.9	47.2	0	0.1	0.1	2.5	4.9	1.8	0.02	1.2196	1.0808	0.1389	2
2019	5	5.58333	5	14	18.5	994.347	175.4	45.52	2.4	50.6	0	0.2	0.2	2.4	6.3	2.7	0.04	0.9786	0.9786	0	2
2019	5	5.625	5	15	17.7	994.354	182.3	41.49	2	59.6	0	0.1	0.1	2.5	7.4	0.1	0.08	1.117	1.022	0.095	1
2019	5	5.66667	5	16	17.6	994.208	216.2	50.32	1.5	57.7	0	0.1	0.2	2.3	7.2	1.4	0.04	1.07828	1.0654	0.0129	1
2019	5	5.70833	5	17	17.2	994.492	209.4	52.5	1.1	58.8	0	0	0.2	2.2	2.4	-0.3	0.03	1.37637	1.1087	0.2676	1
2019	5	5.75	5	18	16.3	994.896	220.2	53.88	0.7	65.1	0.1	0.1	0.9	1.2	4	1.5	0.06	1.95709	1.1521	0.805	1
2019	5	5.79167	5	19	15.8	995.385	228.8	56.72	0.6	68.5	0.1	0.1	1.3	0.6	6.5	3.3	0.1	2.28809	1.1955	1.0926	1
2019	5	5.83333	5	20	15.4	995.828	238.4	48.16	0.8	68	0.2	0.1	1.5	0.5	6.2	2.3	0.11	2.20388	1.2389	0.965	1
2019	5	5.875	5	21	15.5	995.908	237.3	35.14	1.3	65.6	0.1	0.1	1	1.1	6.6	3.4	0.08	2.25711	1.2823	0.9749	1
2019	5	5.91667	5	22	15.1	995.848	227.9	47.63	1	65.5	0.1	0	0.9	1.2	4.6	2.4	0.05	2.31711	1.3256	0.9915	1
2019	5	5.95833	5	23	14.6	995.599	234.3	58.51	0.7	65	0.1	0	0.8	1.3	4.1	2	0.05	2.45164	1.369	1.0826	1
2019	5	6	6	0	14.3	995.361	239	47.53	0.9	64.2	0.1	0	0.8	1.3	3.4	1.4	0.06	2.80296	1.4124	1.3906	1
2019	5	6.04167	6	1	13.7	995.355	251.6	30.74	1.2	65.7	0.1	0	0.5	1.5	3.4	1.4	0.08	3.14074	1.4558	1.685	1
2019	5	6.08333	6	2	13.3	995.174	258.2	34.13	1.3	66.6	0.1	0	-9999	-9999	5.7	3.4	0.09	3.83857	1.4992	2.3394	1
2019	5	6.125	6	3	12.7	995.05	262.9	36.38	1.2	70	0.1	0	0.5	1.2	5.6	3.5	0.09	4.46284	1.5425	2.9203	1
2019	5	6.16667	6	4	12.6	995.048	250.4	32.24	1.3	69.8	0.1	0	0.6	1.2	6.3	4.5	0.08	4.55091	1.5859	2.965	1
2019	5	6.20833	6	5	12.6	995.184	251.3	36.19	1.2	67.7	0.1	0	0.8	1.1	3.7	1.4	0.06	4.54993	1.6293	2.9206	1
2019	5	6.25	6	6	12.6	995.605	246.7	35.28	1.1	66.9	0.1	0.1	1.3	0.6	2.9	0.6	0.05	4.46379	1.6727	2.7911	1
2019	5	6.29167	6	7	12.9	996.074	241.3	32.36	1.3	65.6	0.1	0.3	1.6	0.4	4.7	2.2	0.05	4.17148	1.716	2.4554	1
2019	5	6.33333	6	8	13.8	996.329	239.3	29.5	1.9	62.7	0.1	0.5	1.1	0.9	0.9	-0.8	0.04	3.85789	1.7594	2.0985	1
2019	5	6.375	6	9	15	996.406	236.5	31.86	2	58.2	0.1	0.7	0.9	1.1	3.9	1.5	0.04	3.5772	1.8028	1.7744	1
2019	5	6.41667	6	10	16.5	996.288	230.7	49.07	1.5	53.1	0.1	0.5	0.6	1.5	3.8	0.9	0.03	3.30039	1.8462	1.4542	1
2019	5	6.45833	6	11	17.6	996.018	227.2	53.9	1.4	49.3	0	0.4	0.4	1.8	4	1	0.03	2.64997	1.8896	0.7604	1
2019	5	6.5	6	12	19	995.324	223.4	53.62	1.3	43.5	0	0.3	0.3	2	3.1	0.5	0.03	2.22072	1.9329	0.2878	1
2019	5	6.54167	6	13	19.8	994.463	199.3	53.04	1.3	38.9	0	0.3	0.3	2.2	3	0.4	0.03	1.97633	1.9763	0	1
2019	5	6.58333	6	14	20.8	993.85	214.6	59.69	1.1	36.6	0	0.2	0.3	2.3	4.1	0.7	0.03	2.07988	2.0799	0	1
2019	5	6.625	6	15	21.2	993.49	209.3	64.12	0.8	35.1	0	0.2	0.3	2.4	8.3	5.2	0.03	2.32378	2.2246	0.0992	4
2019	5	6.66667	6	16	21.1	993.094	184.9	62.14	1	35.1	0	0.2	0.3	2.2	8.9	5.8	0.03	2.68188	2.3693	0.3126	4
2019	5	6.70833	6	17	20	993.149	98.7	53.69	0.9	40.8	0.1	0.3	1.1	1.5	5.4	1.9	0.05	3.3739	2.5139	0.86	4
2019	5	6.75	6	18	17.2	993.764	68.2	50.2	0.6	53.2	0.3	0.5	2.3	0.6	11	3.6	0.1	4.40177	2.6586	1.7431	4
2019	5	6.79167	6	19	15.9	994.354	87.2	78.74	0.1	58.8	0.3	0.6	2.6	0	15.7	5	0.16	5.90486	2.8033	3.1015	4
2019	5	6.83333	6	20	14.3	994.551	49.8	66.85	0.2	66.2	0.5	10.1	3	-0.1	24.2	9.7	0.31	7.75445	2.948	4.8064	4
2019	5	6.875	6	21	13.2	994.62	86.8	64.76	0.3	73.2	0.5	6.1	2.6	-0.1	33.4	13.5	0.24	9.90891	3.0927	6.8162	4
2019	5	6.91667	6	22	12	994.624	159.7	72.77	0.3	79.9	0.4	6	2.1	-0.1	23.2	8.4	0.21	12.799	3.2374	9.5616	4
2019	5	6.95833	6	23	11.1	994.337	63	71.37	0.3	82.7	0.4	9.9	2	-0.1	16.2	6	0.28	14.4675	3.3821	11.0855	4
2019	5	7	7	0	9.9	994.135	58	43.59	0.3	87.2	0.8	15	2.4	-0.1	26.4	13.3	0.48	16.0036	3.5268	12.4768	4
2019	5	7.04167	7	1	9.3	993.743	25.8	55.52	0.4	91.2	0.6	12	1.9	-0.1	31	15.7	0.43	16.5852	3.6715	12.9138	4
2019	5	7.08333	7	2	8.7	993.733	317	71.65	0.2	91.1	0.4	6.85	-9999	-9999	25	12.8	0.41	15.8332	3.8162	12.017	4
2019	5	7.125	7	3	9.4	993.514	263.2	45.3	0.5	83.7	0.2	1.7	1.5	-0.2	17.1	10.1	0.22	16.3026	3.9608	12.3418	4
2019	5	7.16667	7	4	8.9	993.356	287	54.99	0.6	83.2	0.2	1.6	1.3	-0.1	11.5	6.9	0.19	16.5155	4.1055	12.41	4
2019	5	7.20833	7	5	8.6	993.509	255.8	48.57	0.5	82.4	0.2	2.3	1.3	-0.1	13.6	8.7	0.19	16.4265	4.2502	12.1763	4
2019	5	7.25	7	6	8.7	993.677	261.6	49	0.5	79	0.2	3	1.5	-0.1	12	8	0.15	18.8316	4.3949	14.4367	4
2019	5	7.29167	7	7	7.5	993.897	1.5	27.53	0.5	83.8	0.5	7.1	1.5	-0.1	12.6	7.7	0.21	18.0588	4.5396	13.5192	4
2019	5	7.33333	7	8	9	994.174	306.6	57.53	0.6	77.4	0.4	4.9	1.5	0	14	8.3	0.18	16.3413	4.6843	11.657	4
2019	5	7.375	7	9	11	994.144	289.6	43.09	0.9	70.1	0.2	2.9	1.3	0.4	11.4	5.8	0.17	14.6611	4.829	9.8321	4
2019	5	7.41667	7	10	13.2	993.746	261	50.26	0.9	63.4	0.2	2.8	1.2	0.6	10.5	4.4	0.19	11.9355	4.9737	6.9619	4
2019	5	7.45833	7	11	16.1	993.292	265.6	54.75	0.9	51.4	0.1	0.7	0.5	1.5	13	6.9	0.12	9.21002	5.1184	4.0917	4
2019	5	7.5	7	12	18.1	992.244	342.6	56.85	1.1	46.4	0.1	0.5	0.5	1.9	11.2	6.7	0.14	7.43447	5.2631	2.1714	4
2019	5	7.54167	7	13	19.8	991.346	358.2	51.41	1.2	40.7	0.1	1	1.1	1.7	12.1	6.7	0.25	6.34706	5.4077	0.9393	4
2019	5	7.58333	7	14	20.9	990.887	349.5	51.92	1.4	38.7	0.1	0.8	1	2	15.8	7.6	0.19	5.55244	5.5524	0	4
2019	5	7.625	7	15	21.8	990.559	359.1	39.55	1.5	37.9	0.1	0.4	0.6	2.4	17	8.5	0.13	5.57566	5.3927	0.1829	4
2019	5	7.66667	7	16	22.2	990.242	343.2	31.59	1.4	37.4	0.1	0.2	0.7	2.6	16.7	8.8	0.13	5.86795	5.233	0.6349	4
2019	5	7.70833	7	17	21.6	990.279	348.8	21.49	1.4	36.1	0.1	0.1	1	2	15.5	7.6	0.11	7.12036	5.0733	2.047	4
2019	5	7.75	7	18	19.9	990.606	359.5	18	1	39.3	0.2	0.4	2.4	0.5	14.9	8.1	0.18	8.04854	4.9136	3.1349	4
2019	5	7.79167	7	19	17.7	991.146	0.3	30.42	0.7	43.5	0.4	1.9	3.2	0	17.3	8.5	0.22	8.34857	4.7539	3.5947	4
2019	5	7.83333	7	20	16.3	991.488	346.9	54.53	0.3	46	0.4	2	3.1	0	17.4	9.2	0.26	9.41516	4.5942	4.8209	4
2019	5	7.875	7	21	14.3	991.838	128.1	93.3	0	56.2	0.5	4.9	3	-0.2	21.6	12.7	0.37	10.9792	4.4345	6.5447	4
2019	5	7.91667	7	22	12.7	991.961	91.4	78.68	0.1	64.1	0.6	9.6	3	-0.2	36	17.3	0.43	13.9931	4.2748	9.7183	4
2019	5	7.95833	7	23	11.9	991.846	154.7	92.72	0.1	72.5	0.6	8.2	2.7	-0.1	31.6	16.1	0.45	17.6594	4.1151	13.5443	4
2019	5	8	8	0	10.5	991.597	68.2	50.32	0.3	80.2	0.5	8.7	2.2	-0.1	27.7	15	0.47	20.563	3.9554	16.6076	4
2019	5	8.04167	8	1	9.7	991.045	128.5	77.65	0.3	83.2	0.4	6	1.7	-0.1	32.3	16.2	0.43	23.5082	3.7957	19.7125	4
2019	5	8.08333	8	2	9	990.798	141.8	52.69	0.5	84.1	0.35	5.9	-9999	-9999	32.7	17.1	0.48	26.5812	3.636	22.9452	4
2019	5	8.125	8	3	8.2	990.506	88.8	54.15	0.3	86.5	0.3	5.8	1.3	-9999	28.7	16.8	0.44	28.4356	3.4763	24.9593	4
2019	5	8.16667	8	4	7.6	990.21	30.6	56.71	0.3	88.2	0.3	10.1	1.6	-0.1	30.9	18	0.52	27.3458	3.3166	24.0292	4
2019	5	8.20833	8	5	7.9	989.853	16.2	63.96	0.4	85.8	0.5	9	1.5	-0.1	33.3	18.5	0.47	26.7583	3.1569	23.6014	4
2019	5	8.25	8	6	8.1	989.707	122.7	60.83	0.3	85.8	0.4	9.6	1.6	-0.1	31.1	16.1	0.48	24.9397	2.9972	21.9425	4
2019	5	8.29167	8	7	9	990.004	50.6	84.61	0.1	80.6	0.4	9.3	2	-0.1	45.8	19.3	0.34	17.489	2.8375	14.6516	4
2019	5	8.33333	8	8	13.4	990.899	66.6	98.46	0	64.4	0.3	2.9	2.1	0.1	24.4	10	0.11	14.6396	2.6778	11.9619	4
2019	5	8.375	8	9	13.2	991.491	173.5	74.43	0.5	65.3	0.4	7.1	2.6	-0.1	21.2	9.6	0.22	11.6925	2.5181	9.1744	4
2019	5	8.41667	8	10	15.5	990.973	318.7	53.57	1.3	56.1	0.2	3.5	1.4	1.1	26.6	9.3	0.16	6.3779	2.3584	4.0195	4
2019	5	8.45833	8	11	18.3	990.919	284.7	47.92	2.1	40.1	0.1	0.2	0.2	2.2	20.9	4.3	0.05	3.62528	2.1987	1.4266	4
2019	5	8.5	8	12	19.5	990.749	248.5	42.05	2.3	36.7	0.1	0.3	0.2	2.3	14.4	2.1	0.02	2.5974	2.0389	0.5585	4
2019	5	8.54167	8	13	20.2	990.576	238.2	33.8	3.3	34	0.1	0.2	0.1	2.3	11.5	2	-9999	1.99345	1.8792	0.1142	4
2019	5	8.58333	8	14	20.5	990.876	254.6	45.07	2.2	32.5	0.1	0.2	0.2	2.3	12.9	1.9	0.01	1.71953	1.7195	0	4
2019	5	8.625	8	15	20.4	990.978	274.6	51.99	2	31.4	0.1	0.2	0.2	2.3	10.7	1.3	0.02	1.58596	1.586	0	3
2019	5	8.66667	8	16	19.5	991.362	247.7	39.83	2.4	32.8	0.1	0.2	0.3	2.1	11.1	3.8	0.01	1.645	1.6043	0.0406	3
2019	5	8.70833	8	17	18.1	992.151	249.2	40.58	2.3	34.8	0.1	0.2	0.5	2	11.8	3.8	0.02	1.94503	1.6227	0.3223	3
2019	5	8.75	8	18	16.8	993.194	251.3	40.92	1.6	37.1	0.1	0.1	0.8	1.7	10.6	3.5	0.03	2.10085	1.6411	0.4597	3
2019	5	8.79167	8	19	15.8	994.158	269.1	48.03	0.8	39.2	0.1	0.1	1.2	1.3	10.3	5	0.04	2.91095	1.6595	1.2515	3
2019	5	8.83333	8	20	14.6	994.831	293	71.29	0.3	43.4	0.2	0.4	2.2	0.2	10.4	4.4	0.07	3.11032	1.6779	1.4324	3
2019	5	8.875	8	21	14	995.094	276.9	70.87	0.7	46.6	0.2	0.2	1.5	0.9	12.4	5	0.06	3.0145	1.6963	1.3182	3
2019	5	8.91667	8	22	14	995.37	256.4	42.28	0.9	48.2	0.1	0	0.8	1.4	9.6	4.3	0.04	3.30872	1.7146	1.5941	3
2019	5	8.95833	8	23	13.1	995.276	293.7	61.61	0.4	52.1	0.1	0	1.1	1.2	10.2	4.7	0.05	4.2669	1.733	2.5339	3
2019	5	9	9	0	12	995.33	340.4	59.49	0.4	57	0.1	0.1	0.8	1.3	10.2	5	0.06	5.95776	1.7514	4.2063	3
2019	5	9.04167	9	1	10.5	995.302	12.5	29.95	0.8	62.3	0.1	0	1.2	0.8	6.5	2.1	0.08	7.26534	1.7698	5.4955	3
2019	5	9.08333	9	2	9.7	995.298	308	91.18	0.2	63.9	0.15	0.4	-9999	-9999	12.2	7.1	0.23	8.13255	1.7882	6.3444	3
2019	5	9.125	9	3	9.5	995.441	280.9	60.94	0.4	66.3	0.2	0.8	1.9	-0.1	13.1	7.4	0.19	9.56885	1.8066	7.7623	3
2019	5	9.16667	9	4	7.9	995.553	348	68.23	0.3	73	0.2	3.9	2.1	0	18.2	11.3	0.28	9.9589	1.8249	8.134	3
2019	5	9.20833	9	5	8.1	995.741	301.8	101.2	0	72.7	0.2	2.3	2	0	19.4	12.8	0.23	12.0882	1.8433	10.2449	3
2019	5	9.25	9	6	6.4	996.211	48.2	56.35	0.3	82.1	0.3	7.5	1.9	0	22.8	12.9	0.34	14.6172	1.8617	12.7555	3
2019	5	9.29167	9	7	6	996.723	44.4	66.28	0.2	84.7	0.6	12	2.2	0	40.9	18.7	0.35	13.3	1.8801	11.4199	3
2019	5	9.33333	9	8	8.1	997.078	231.2	109.87	0.1	74.8	0.6	12.8	2.5	0.1	39.3	18.7	0.37	11.0729	1.8985	9.1744	3
2019	5	9.375	9	9	10.5	997.008	324.8	57.26	0.6	66.9	0.5	8.9	2.4	0.2	27.5	15.9	0.44	8.55449	1.9169	6.6376	3
2019	5	9.41667	9	10	13.4	996.602	284	46.09	0.9	56.8	0.2	2.5	1.5	0.9	22.2	13.2	0.15	6.3584	1.9352	4.4232	3
2019	5	9.45833	9	11	15.9	996.034	330.6	58.79	0.9	47.9	0.1	0.7	0.8	1.7	12.2	6.1	0.12	4.31425	1.9536	2.3606	3
2019	5	9.5	9	12	17.5	994.966	3.2	64.13	0.9	42	0.1	0.7	0.9	1.9	9.3	3.2	0.18	2.78889	1.972	0.8169	3
2019	5	9.54167	9	13	19.2	993.809	345.9	43.74	1.6	35.9	0.2	0.4	0.6	2.3	10.2	3.1	0.06	2.11235	1.9904	0.122	3
2019	5	9.58333	9	14	19.9	993.154	3.5	29.09	2.2	34	0.3	0.2	0.4	2.7	26.9	8.8	0.08	2.00878	2.0088	0	3
2019	5	9.625	9	15	20.5	992.493	25.3	33.13	1.8	34.2	0.1	0.2	0.4	2.6	20	7.2	0.03	2.16363	2.1404	0.0233	4
2019	5	9.66667	9	16	20.1	992.288	51.9	26.84	1.7	37.1	0.1	0.3	0.8	2.1	8.4	2.9	0.04	2.57303	2.272	0.3011	4
2019	5	9.70833	9	17	18.9	992.466	54.9	21.3	1.3	43.2	0.1	0.2	1.2	1.7	13.2	4.8	0.05	3.19633	2.4035	0.7928	4
2019	5	9.75	9	18	17	992.945	82.2	21.92	0.8	53.7	0.4	2.1	2.7	0.2	19.6	8.7	0.12	4.55618	2.5351	2.021	4
2019	5	9.79167	9	19	15.5	993.013	63.9	39.21	0.4	60.1	0.4	3.5	3	0	26.4	10.8	0.17	5.70793	2.6667	3.0412	4
2019	5	9.83333	9	20	15.1	993.155	6.1	46.02	0.2	62.2	0.4	4.4	3.1	0	23.9	9.7	0.2	6.37382	2.7983	3.5755	4
2019	5	9.875	9	21	14.2	993.245	80.6	75.18	0.1	63.4	0.4	3.9	2.9	0	21.7	9	0.22	8.0579	2.9299	5.128	4
2019	5	9.91667	9	22	13.3	993.411	18.3	53.71	0.3	66.9	0.5	5.7	2.6	0	22.2	10.4	0.25	10.1678	3.0615	7.1064	4
2019	5	9.95833	9	23	12.2	993.327	68.4	54.46	0.2	74.7	1	15	2.9	0	32.7	18.2	0.46	14.0238	3.1931	10.8308	4
2019	5	10	10	0	11.3	993.099	91.3	59.69	0.3	83	0.8	15	2.8	0	49.1	27.7	0.43	17.573	3.3247	14.2483	4
2019	5	10.0417	10	1	10.7	993.007	140.6	61.48	0.3	81	0.4	6.9	2.1	0	46.1	24.8	0.67	20.9421	3.4562	17.4859	4
2019	5	10.0833	10	2	9.9	992.821	86.4	53.65	0.3	84	0.45	5.85	-9999	-9999	42.3	22.8	0.87	20.4117	3.5878	16.8239	4
2019	5	10.125	10	3	9.7	992.521	161.1	65.82	0.3	83.1	0.5	4.8	1.7	-0.1	44.9	27.8	1.32	19.5213	3.7194	15.8019	4
2019	5	10.1667	10	4	9.3	992.5	139.8	69.44	0.3	83.4	0.6	5.7	1.7	0	57.2	44.2	2.33	20.492	3.851	16.641	4
2019	5	10.2083	10	5	8.9	992.583	159.4	37.31	0.7	84.1	0.7	7.1	1.4	0	77.5	65	3.04	21.3438	3.9826	17.3612	4
2019	5	10.25	10	6	8.6	992.822	150.7	54.21	0.4	84	0.7	7.6	1.5	0	84.8	72.2	2.65	23.3995	4.1142	19.2853	4
2019	5	10.2917	10	7	8.3	992.795	147.5	61.48	0.4	85.3	0.8	12.3	1.7	0	94.5	68	2.47	23.7315	4.2458	19.4857	4
2019	5	10.3333	10	8	9.7	992.805	113.7	83.87	0.3	80	0.8	15.1	2.1	-0.1	88	52.2	1.19	20.6227	4.3774	16.2453	4
2019	5	10.375	10	9	11.4	993.04	250.7	58.36	0.7	72	0.7	14.5	2.6	0	55.7	36.8	0.72	17.3106	4.5089	12.8017	4
2019	5	10.4167	10	10	12.6	992.967	268.9	66.46	0.8	64.8	0.3		-9999	-9999	28.6	15.1	-9999	15.1813	4.6405	10.5408	4
2019	5	10.4583	10	11	14.4	991.975	350.4	84.5	0.2	58.5	0.3		-9999	-9999	28	15.7	-9999	14.7951	4.7721	10.023	4
2019	5	10.5	10	12	14.8	991.556	337.4	37.15	0.8	60.3	0.3	3	2.1	0.1	27.3	12.2	-9999	13.2775	4.9037	8.3738	4
2019	5	10.5417	10	13	15.7	990.746	235.2	86.75	0.3	59.6	0.2	2.8	1.8	0.3	23.3	7.7	0.32	12.6726	5.0353	7.6373	4
2019	5	10.5833	10	14	16.3	990.414	301.5	51.28	0.7	56	0.2	1.9	1.7	0.5	19	5.4	0.29	11.8809	5.1669	6.714	4
2019	5	10.625	10	15	17.5	990.311	335.5	40.13	1.1	54.7	0.2	2.2	1.7	0.6	32.2	15.1	0.33	11.0359	5.2985	5.7374	1
2019	5	10.6667	10	16	18.1	990.398	317.8	44.63	1.4	54	0.2	1.4	1.5	0.8	32.2	13	0.25	9.21825	5.4301	3.7882	1
2019	5	10.7083	10	17	17.1	990.771	333.5	26.88	2	51.9	0.1	0.4	1.2	1.1	20.4	6.4	0.18	5.56165	5.5616	0	1
2019	5	10.75	10	18	16	992.167	307	41.4	1.8	44.8	0.1	0.1	0.5	1.8	10	0.4	0.05	3.57364	3.5736	0	1
2019	5	10.7917	10	19	14	993.139	300.8	40.45	1.8	50.3	0.1	0	0.3	2	11.1	2.2	0.04	2.9	2.9	0	1
2019	5	10.8333	10	20	12.3	993.768	340.5	30.91	1.5	56.2	0.1	0	0.5	1.6	6.8	2	0.03	2.92613	2.7178	0.2083	1
2019	5	10.875	10	21	11.6	993.784	339.9	28.96	1.5	58.8	0.1	0	0.9	1.2	5.8	3.3	0.07	2.76642	2.5356	0.2308	1
2019	5	10.9167	10	22	11.9	993.491	337.4	27.76	2	55.7	0.1	0	0.6	1.5	4.5	1.9	0.05	2.39379	2.3534	0.0404	1
2019	5	10.9583	10	23	11.6	993.668	329.9	39.24	1.6	53.3	0.1	0	0.1	1.9	4	0.8	0.02	2.17117	2.1712	0	1
2019	5	11	11	0	11.4	993.334	325.7	27.28	1.8	53.2	0.1	0	0.1	1.9	3	1	0.01	2.45185	2.2843	0.1675	1
2019	5	11.0417	11	1	10.6	993.45	342.4	44.67	1	56	0.1	0	0.2	1.7	3.5	1.6	0.02	3.33841	2.3975	0.9409	1
2019	5	11.0833	11	2	9.5	993.092	4.8	23.86	1.3	60.5	0.1	0	-9999	-9999	2.9	1.4	0.03	4.54727	2.5107	2.0366	1
2019	5	11.125	11	3	8.5	992.63	1.6	53.08	0.5	64.6	0.1	0	0.6	1	6.3	4.5	0.03	4.74955	2.6238	2.1257	1
2019	5	11.1667	11	4	9.1	992.408	294.1	38.75	0.6	62.4	0.1	0	0.5	1.3	6.2	4.9	0.02	5.19089	2.737	2.4539	1
2019	5	11.2083	11	5	9.2	992.545	298.9	61.16	0.5	63	0.1	0	0.6	1.2	2.3	1.4	0.02	5.19669	2.8502	2.3465	1
2019	5	11.25	11	6	10.6	992.998	287.8	51.35	0.7	61	0.1	0	0.3	1.5	0.1	-1.2	0.01	6.18391	2.9633	3.2206	1
2019	5	11.2917	11	7	10.1	993.735	359.4	37.35	0.6	63.9	0.1	0.6	1.5	0.3	2.7	0.9	0.03	6.12679	3.0765	3.0503	1
2019	5	11.3333	11	8	11.6	994.155	303.2	50.19	0.7	61.8	0.1	0.4	1.1	0.9	5.9	3.1	0.04	5.50832	3.1897	2.3187	1
2019	5	11.375	11	9	14.5	994.413	257.3	43.71	1.7	52.8	0.1	0.2	0.3	1.7	5.5	1.6	0.03	4.99535	3.3028	1.6925	1
2019	5	11.4167	11	10	16.5	994.532	250.7	37.25	2.5	45.3	0.1	0.2	0.2	2	10.3	1.2	0.04	4.614	3.416	1.198	1
2019	5	11.4583	11	11	18.3	994.799	242.6	37.86	2.6	40.7	0.1	0.2	0.2	2.1	9	0.4	0.05	4.31686	3.5292	0.7877	1
2019	5	11.5	11	12	19.4	994.878	239.4	36.41	2.9	38.3	0.1	0.3	0.2	2.1	6.7	0.8	0.07	3.99552	3.6423	0.3532	1
2019	5	11.5417	11	13	20.4	994.637	234.9	41.43	2.8	36	0.1	0.2	0.2	2.2	7.5	1.9	0.07	3.75548	3.7555	0	1
2019	5	11.5833	11	14	21.1	995.112	219.2	53.97	1.7	34.7	0	0.2	0.2	2.2	9.3	2.6	0.07	3.78355	3.69	0.0936	1
2019	5	11.625	11	15	20.7	995.48	221.7	46.77	1.6	35.8	0.1	0.2	0.3	2.2	8.8	4.1	0.06	3.86678	3.6245	0.2423	2
2019	5	11.6667	11	16	20.4	996.1	240.7	36.37	2.1	37.2	0.1	0.2	0.3	2.1	8.3	4.8	0.06	4.131	3.559	0.572	2
2019	5	11.7083	11	17	18.8	997.151	245	35.65	2.1	40.1	0.1	0.1	0.4	1.9	7.2	3.4	0.06	4.24326	3.4935	0.7498	2
2019	5	11.75	11	18	17.2	998.38	238.2	32.62	2.1	42.6	0.1	0.2	0.6	1.6	7.2	3.7	0.07	4.47071	3.428	1.0427	2
2019	5	11.7917	11	19	15.7	999.382	238.2	32.59	2	47.5	0.1	0.1	0.5	1.5	6.1	2.8	0.09	4.69912	3.3625	1.3366	2
2019	5	11.8333	11	20	14.6	1000.13	235.6	36.27	1.5	50.6	0.1	0.1	0.5	1.4	8.1	4.8	0.1	4.83751	3.297	1.5405	2
2019	5	11.875	11	21	13.9	1000.89	233.7	32.89	1.5	52.5	0.1	0.1	0.4	1.5	7.8	4.8	0.09	5.74924	3.2315	2.5177	2
2019	5	11.9167	11	22	12.7	1000.98	295.3	87.45	0.2	57	0.1	0.1	1	0.8	9.1	6.4	0.11	6.22542	3.166	3.0594	2
2019	5	11.9583	11	23	11.9	1001.09	273.8	43.72	0.6	60.1	0.2	0.2	1.2	0.6	8.5	5.4	0.13	6.58546	3.1005	3.485	2
2019	5	12	12	0	12.1	1001.12	239.8	46.84	1.1	59.5	0.1	0.1	0.6	1.2	8	4.8	0.11	6.71515	3.035	3.6801	2
2019	5	12.0417	12	1	11.6	1001.02	258.5	39.26	0.7	61.7	0.1	0	0.6	1.2	5.7	2.8	0.1	7.09648	2.9695	4.127	2
2019	5	12.0833	12	2	11.3	1000.91	264.5	29.75	0.9	63.4	0.15	0	-9999	-9999	6.5	3.5	0.09	8.08951	2.904	5.1855	2
2019	5	12.125	12	3	10.2	1000.91	310.1	39.95	0.5	67.5	0.2	0	1.1	0.4	10.3	7.4	0.13	10.5072	2.8385	7.6687	2
2019	5	12.1667	12	4	9.1	1000.93	324.9	55.76	0.3	71.9	0.2	0.1	1.3	0.4	6.4	3.1	0.13	10.9215	2.773	8.1485	2
2019	5	12.2083	12	5	9.2	1001.28	275.1	56.6	0.4	72.5	0.2	0.1	1.1	0.5	6.8	3.4	0.12	11.6561	2.7075	8.9486	2
2019	5	12.25	12	6	8.8	1001.67	335.8	71.93	0.3	74.1	0.2	0.4	1.2	0.3	8.5	5.4	0.13	13.9286	2.642	11.2866	2
2019	5	12.2917	12	7	7.2	1002.23	20.9	24.62	0.7	81.4	0.2	1.4	1.5	-0.1	9.9	6.7	0.16	12.6084	2.5765	10.0319	2
2019	5	12.3333	12	8	9.2	1002.68	296.9	52.86	0.5	73.7	0.2	0.6	1	0.5	10.9	7.8	0.16	10.7153	2.511	8.2043	2
2019	5	12.375	12	9	11.6	1003.02	312.4	47.68	0.8	65.7	0.2	0.4	0.6	1.1	8.6	5.4	0.14	9.14251	2.4455	6.697	2
2019	5	12.4167	12	10	13.8	1003.06	276.1	47.94	1	57.9	0.1	0.3	0.4	1.5	9.5	6.4	0.09	8.27142	2.38	5.8914	2
2019	5	12.4583	12	11	16.3	1002.55	252.3	42.37	1.3	51.6	0.1	0.2	0.3	1.6	8.9	5.9	0.09	6.80122	2.3145	4.4867	2
2019	5	12.5	12	12	18.7	1001.99	219.7	52.87	0.9	44.6	0.1	0.2	0.3	1.9	6.4	3.5	0.07	5.14133	2.249	2.8923	2
2019	5	12.5417	12	13	20.4	1001.47	159.7	95.88	0.2	41.2	0.1	0	0.2	2.4	4.7	1.8	0.04	3.85793	2.1835	1.6744	2
2019	5	12.5833	12	14	21.4	1001.4	296.1	83.44	0.4	39.5	0.1	0	0.2	2.7	5.9	3.2	0.04	3.32656	2.118	1.2085	2
2019	5	12.625	12	15	21.4	1001.31	56.5	41.8	1.3	40	0.1	0	0.2	2.9	9.4	6.3	0.06	2.43031	2.0525	0.3778	4
2019	5	12.6667	12	16	21	1001.45	71.3	30.89	1.4	40.7	0.1	0.2	0.4	2.8	8.9	5.3	0.05	1.98702	1.987	0	4
2019	5	12.7083	12	17	19.1	1001.9	103.7	21.93	1.8	46.8	0.1	0.3	0.7	2.2	8.8	4.3	0.07	2.12736	1.9943	0.133	4
2019	5	12.75	12	18	17.4	1002.43	103.6	19.61	1	51.8	0.1	0	0.7	1.9	8	3.3	0.07	3.14071	2.0017	1.1391	4
2019	5	12.7917	12	19	15.4	1003.33	355.3	54.32	0.2	59.3	0.2	0.6	1.9	0.6	9.1	3.1	0.15	4.27117	2.009	2.2622	4
2019	5	12.8333	12	20	13.7	1003.67	113.8	67.9	0.2	67.4	0.3	0.9	2.4	-0.1	20.1	10	0.23	6.71599	2.0163	4.6997	4
2019	5	12.875	12	21	12.8	1003.86	161.4	61.05	0.4	72.8	0.4	1.6	2.2	-0.1	15	8.2	0.21	8.79593	2.0236	6.7723	4
2019	5	12.9167	12	22	11.8	1004.11	130.1	87.83	0.1	77	0.3	1.8	2.1	-0.1	14.8	8.2	0.27	11.2659	2.0309	9.235	4
2019	5	12.9583	12	23	11.1	1004.01	85.3	49.07	0.3	80.9	0.6	5.2	2.3	-0.1	18.7	10.7	0.42	11.9241	2.0382	9.8858	4
2019	5	13	13	0	10.6	1004	322.8	75.65	0.2	82.1	0.5	5.2	2.2	-0.1	22.8	14.9	0.38	10.9572	2.0455	8.9116	4
2019	5	13.0417	13	1	10.9	1003.93	252.1	73.53	0.5	79.7	0.3	1.4	2	0	16.9	11.2	0.28	11.9879	2.0529	9.9351	4
2019	5	13.0833	13	2	10.1	1003.86	293	91.1	0.1	81.9	0.25	1.05	-9999	-9999	14.3	9.5	0.24	13.5259	2.0602	11.4657	4
2019	5	13.125	13	3	9.5	1003.67	345.4	68.13	0.3	84.2	0.2	0.7	1.7	-0.2	12.5	7.9	0.2	15.5322	2.0675	13.4648	4
2019	5	13.1667	13	4	8.3	1003.63	39.9	32.68	0.4	88.2	0.2	1.3	1.5	-0.1	11.1	7.7	0.23	15.9833	2.0748	13.9085	4
2019	5	13.2083	13	5	8.4	1003.88	304.1	59.25	0.4	87.7	0.2	0.5	1.4	0	12.7	7.4	0.21	16.0249	2.0821	13.9428	4
2019	5	13.25	13	6	8.7	1003.99	268.4	38.52	0.8	84.9	0.2	1.1	1.4	-0.1	11.4	7.9	0.21	16.6172	2.0894	14.5278	4
2019	5	13.2917	13	7	8.3	1004.49	282.2	41.53	0.5	86	0.3	3.8	1.6	-0.1	14.8	8.7	0.24	15.2709	2.0968	13.1741	4
2019	5	13.3333	13	8	9.4	1005.06	295.2	34.97	0.8	82.3	0.4	3.9	1.6	0	16.5	9.5	0.25	14.2343	2.1041	12.1302	4
2019	5	13.375	13	9	11.6	1005.07	302.7	44.88	0.8	75.2	0.3	3.5	1.4	0.2	20.7	10.6	0.24	13.4687	2.1114	11.3573	4
2019	5	13.4167	13	10	14.1	1004.57	279.5	56.46	0.7	66.4	0.2	2	1.2	0.6	16.1	8.2	0.21	12.0353	2.1187	9.9166	4
2019	5	13.4583	13	11	16.4	1004.09	348.9	55.03	0.8	61.4	0.2	1.3	0.9	0.9	13.3	6.1	0.23	8.58195	2.126	6.4559	4
2019	5	13.5	13	12	18.8	1003.14	5.3	24.22	2.2	57.2	0.1	2.1	1.4	1.1	17	7.7	0.24	5.05987	2.1333	2.9265	4
2019	5	13.5417	13	13	20.9	1002.21	11.6	19.93	2.9	54.1	0	0.5	0.5	2	18.4	8.4	0.11	3.00412	2.1407	0.8635	4
2019	5	13.5833	13	14	22.1	1001.42	7.6	24.44	2.7	51.1	0	0.2	0.3	2.3	13.9	6.1	0.06	2.17949	2.148	0.0315	4
2019	5	13.625	13	15	21.9	1001.1	12	20.65	2.9	52.3	0	0.1	0.3	2.3	10	4.7	0.05	2.15529	2.1553	0	4
2019	5	13.6667	13	16	21.6	1000.85	16.9	20.54	2.1	53.8	0.1	0.1	0.5	2	9.3	4.5	0.06	2.44467	2.3084	0.1363	4
2019	5	13.7083	13	17	20.7	1000.92	48.1	17.62	1.4	62.3	0.1	0.2	1.3	1.1	10.8	3.7	0.1	2.84343	2.4615	0.3819	4
2019	5	13.75	13	18	19.1	1001.09	60.3	18.85	0.8	72.9	0.2	0.5	2	0.2	16.8	6.7	0.16	3.89162	2.6146	1.277	4
2019	5	13.7917	13	19	17.6	1001.59	77	87.99	0.1	80.2	0.5	2.1	2.4	-0.1	17.9	7.5	0.21	5.34535	2.7677	2.5776	4
2019	5	13.8333	13	20	16.6	1001.94	323.6	97.39	0	84.4	0.4	5.2	2.4	-0.1	20.9	8	0.29	7.44175	2.9208	4.5209	4
2019	5	13.875	13	21	15.8	1001.85	56.2	86.98	0.1	87	0.6	10.2	2.5	-0.1	23.3	10	0.38	9.25455	3.0739	6.1806	4
2019	5	13.9167	13	22	15.3	1001.74	148.9	58.63	0.4	88.5	0.7	9.7	2.4	-0.1	31.1	13.2	0.42	10.7741	3.2271	7.547	4
2019	5	13.9583	13	23	14.9	1001.66	123.3	88.54	0.2	88.7	0.4	6.7	2	-0.1	30.9	13.3	0.37	11.9539	3.3802	8.5738	4
2019	5	14	14	0	14	1001.71	265	95.25	0.2	92.3	0.6	9.5	2.1	-0.1	25.7	11.7	0.47	12.3778	3.5333	8.8446	4
2019	5	14.0417	14	1	13.7	1001.52	317.6	79.42	0.1	90.4	0.5	10.6	2.2	-0.1	22.5	8.7	0.47	13.186	3.6864	9.4996	4
2019	5	14.0833	14	2	13.4	1001.51	271.8	45.62	0.5	90.8	0.4	6.65	-9999	-9999	27.6	15.2	0.46	14.9543	3.8395	11.1148	4
2019	5	14.125	14	3	13.1	1001.31	271.1	43.9	0.5	89.4	0.3	2.7	1.6	-9999	23.8	13.3	0.39	18.0621	3.9926	14.0695	4
2019	5	14.1667	14	4	12.2	1001.15	341.5	60.97	0.3	91.6	0.3	2.8	1.3	-0.2	18.6	10.2	0.37	20.0124	4.1457	15.8666	4
2019	5	14.2083	14	5	11.5	1001.42	27.3	32.92	0.5	93.5	0.3	3.8	1.2	-0.2	19.6	11.8	0.37	20.4634	4.2988	16.1645	4
2019	5	14.25	14	6	11.4	1001.73	276.1	66.62	0.2	93.7	0.3	3.4	1.3	-0.2	19.7	12.7	0.33	20.9066	4.4519	16.4547	4
2019	5	14.2917	14	7	11.5	1002.39	258.3	38.8	0.7	90.7	0.3	6.4	1.6	-0.1	19.6	11.9	0.34	19.2061	4.605	14.6011	4
2019	5	14.3333	14	8	12.4	1002.7	250.4	37.37	0.6	86.6	0.4	6.6	1.6	-0.1	19.3	11.7	0.35	18.0708	4.7582	13.3126	4
2019	5	14.375	14	9	14.4	1002.74	292	72.35	0.4	77.3	0.5	7.8	2	0	20.3	12.7	0.41	15.956	4.9113	11.0447	4
2019	5	14.4167	14	10	16.8	1002.72	272	73.97	0.5	66.8	0.4	7.5	2.2	0.1	26.3	14.9	0.41	13.4124	5.0644	8.348	4
2019	5	14.4583	14	11	19.4	1002.48	184	91.31	0.4	54	0.2	3.1	1.7	0.8	25.5	13.2	0.26	10.0012	5.2175	4.7837	4
2019	5	14.5	14	12	21.4	1002.03	180.9	77.88	0.6	43.3	0.1	0.7	0.7	1.9	19.1	8.2	0.15	7.52391	5.3706	2.1533	4
2019	5	14.5417	14	13	23	1001.53	181.3	67.14	0.8	33.4	0.1	0.3	0.3	2.6	16.1	6.7	0.1	6.46119	5.5237	0.9375	4
2019	5	14.5833	14	14	23.9	1001.24	175.8	74.62	0.6	31.6	0.1	0.3	0.2	2.9	17.8	7.5	0.1	6.04016	5.6768	0.3633	4
2019	5	14.625	14	15	22.5	1001.18	109.9	33.27	2.1	40.5	0.1	0.2	0.2	3.2	21.5	12.3	0.5	6.05467	5.8299	0.2247	3
2019	5	14.6667	14	16	20.9	1001.34	112.2	23.84	2.1	49.2	0.1	0.2	0.1	2.6	22.3	11.8	0.13	5.98304	5.983	0	3
2019	5	14.7083	14	17	19.6	1001.71	117.9	30.96	1.8	56.3	0.1	0.2	0.2	2.2	10.7	1.6	0.11	6.19307	5.9023	0.2908	3
2019	5	14.75	14	18	18	1002.31	154.6	43.71	0.6	64	0.1	0.3	0.8	1.4	9.7	2.5	0.12	7.12221	5.8215	1.3007	3
2019	5	14.7917	14	19	16.7	1002.95	231.7	80.13	0.1	69.6	0.2	0.3	1.4	0.6	11.6	3.7	0.15	7.75713	5.7407	2.0164	3
2019	5	14.8333	14	20	16.4	1003.25	261.1	62.95	0.5	71.7	0.4	3.2	2.5	-0.2	15.1	6.1	0.25	8.36591	5.6599	2.706	3
2019	5	14.875	14	21	15.4	1003.64	261.6	67.87	0.4	75.9	0.4	4.2	2.4	-0.2	19.8	8.8	0.31	10.4652	5.5791	4.8861	3
2019	5	14.9167	14	22	13.9	1003.91	217.8	101.76	0.1	82.1	0.5	5.1	2.2	-0.1	22.2	10.2	0.32	10.7004	5.4983	5.202	3
2019	5	14.9583	14	23	13.9	1003.93	198.2	89.68	0.2	82	0.3	3.1	2.1	-0.1	21.9	11	0.29	10.1922	5.4176	4.7747	3
2019	5	15	15	0	13.6	1003.99	199.5	64.11	0.4	81.6	0.2	1.5	1.9	-0.1	15.6	7.9	0.27	10.6471	5.3368	5.3104	3
2019	5	15.0417	15	1	13	1003.85	223.6	63.12	0.4	82.4	0.1	1.2	1.8	-0.1	10.8	5.2	0.21	11.3198	5.256	6.0638	3
2019	5	15.0833	15	2	12.3	1003.82	268.8	44.39	0.6	84.2	0.1	0.85	-9999	-9999	8.3	3.8	0.21	12.487	5.1752	7.3118	3
2019	5	15.125	15	3	11.8	1003.64	268.3	52.61	0.5	86	0.1	0.5	1.6	-9999	12.2	6.3	0.21	13.7704	5.0944	8.676	3
2019	5	15.1667	15	4	11.4	1003.69	260.7	51.25	0.5	86.5	0.1	0.3	1.4	0	9.5	4.9	0.22	14.9696	5.0137	9.956	3
2019	5	15.2083	15	5	11.1	1003.97	255.2	49.58	0.6	86.9	0.1	0.3	1.3	0	8	4	0.22	15.862	4.9329	10.9291	3
2019	5	15.25	15	6	11	1004.28	283.7	44.83	0.6	87.4	0.2	1.2	1.5	-0.1	7.2	2.8	0.23	16.4514	4.8521	11.5993	3
2019	5	15.2917	15	7	10.9	1004.68	292.3	54.75	0.5	87.3	0.3	3.9	1.7	-0.1	13.9	7.5	0.25	16.1494	4.7713	11.3781	3
2019	5	15.3333	15	8	11.6	1005.14	285.1	32.16	0.8	84.4	0.4	8.1	2	0	19.4	8.9	0.29	15.1825	4.6905	10.492	3
2019	5	15.375	15	9	13.2	1005.25	253.3	45.77	0.9	77	0.3	5	1.6	0.2	21.2	9.9	0.26	14.3763	4.6097	9.7665	3
2019	5	15.4167	15	10	15.7	1005.07	288.9	56.13	0.7	68.8	0.2	2.2	1.2	0.5	19.2	8.7	0.22	13.1006	4.529	8.5717	3
2019	5	15.4583	15	11	18.5	1004.83	275.3	59.36	0.6	62.1	0.2	1.9	1.3	0.8	21.1	9.2	0.2	9.87762	4.4482	5.4295	3
2019	5	15.5	15	12	20.4	1004.28	328	92.85	0.3	59.1	0.1	0.7	0.8	1.7	15.5	5.6	0.15	6.54815	4.3674	2.1808	3
2019	5	15.5417	15	13	21.4	1003.61	3.7	71.44	1	53.7	0	0.2	0.3	2.5	13.6	5.1	-9999	4.9231	4.2866	0.6365	3
2019	5	15.5833	15	14	21.6	1003.1	21.6	43.14	1.1	50.5	0.1	0.3	0.5	2.6	14.4	6.5	0.11	4.33269	4.2058	0.1269	3
2019	5	15.625	15	15	22.4	1002.78	33.9	69.06	0.7	44.6	0.1	0.2	0.5	2.8	18.6	7.3	0.12	4.24752	4.125	0.1225	4
2019	5	15.6667	15	16	21.8	1002.57	93.8	28.53	1.6	50.2	0.1	0.3	1	2.3	16.4	8.1	0.13	4.04426	4.0443	0	4
2019	5	15.7083	15	17	20.2	1002.66	95	21.56	1.6	62.7	0.1	0.3	1.5	1.6	18.9	8.4	0.15	4.44204	3.9677	0.4744	4
2019	5	15.75	15	18	18.7	1003.18	97.2	17.85	0.9	69.2	0.2	0.4	2.4	0.5	15.8	6	0.19	5.71769	3.8911	1.8266	4
2019	5	15.7917	15	19	17	1003.69	50.8	50.05	0.2	76.9	0.4	2.2	3.1	-0.1	19	8.3	0.26	6.47165	3.8145	2.6572	4
2019	5	15.8333	15	20	15.5	1003.9	72.9	60.34	0.1	83.9	0.6	8.1	3.5	-0.1	25.2	11.7	0.39	8.28446	3.7379	4.5466	4
2019	5	15.875	15	21	14.4	1004.12	35	44.96	0.2	88.3	0.7	6.3	2.8	-0.1	31.2	13.7	0.44	9.29103	3.6613	5.6298	4
2019	5	15.9167	15	22	14.6	1004.23	247.8	77.06	0.3	85.9	0.7	8.3	3.1	-0.1	30.7	14.2	0.47	10.887	3.5847	7.3024	4
2019	5	15.9583	15	23	13.5	1004.2	162.9	59.52	0.4	88.8	0.5	7.7	2.6	-0.2	26.5	14.2	0.4	13.4228	3.5081	9.9148	4
2019	5	16	16	0	13.5	1003.99	166.8	76.58	0.4	88.9	0.4	5.4	2.2	-0.2	20.4	11.6	0.35	16.4213	3.4315	12.9898	4
2019	5	16.0417	16	1	12.6	1003.73	26.8	28.71	0.3	91.4	0.7	9.2	2.3	-0.2	17.5	10.4	0.48	17.1743	3.3549	13.8194	4
2019	5	16.0833	16	2	12.5	1003.63	297.7	85.68	0.2	92	0.5	6.2	-9999	-9999	25.5	15.3	0.53	16.6545	3.2783	13.3763	4
2019	5	16.125	16	3	12.7	1003.4	286.9	44	0.5	89.8	0.3	3.2	1.9	-0.2	22.3	14.4	0.38	17.6892	3.2017	14.4875	4
2019	5	16.1667	16	4	12	1003.24	308.5	50.44	0.4	90.5	0.2	1.4	1.6	-0.1	15.4	9.7	0.32	20.5763	3.1251	17.4513	4
2019	5	16.2083	16	5	11	1003.23	2.7	53.44	0.3	94.1	0.3	2.6	1.4	-0.1	15.3	9.5	0.35	21.8239	3.0485	18.7754	4
2019	5	16.25	16	6	10.8	1003.5	329.4	62.16	0.3	94.4	0.3	3.1	1.4	-0.1	12.9	7.8	0.33	21.6797	2.9719	18.7078	4
2019	5	16.2917	16	7	10.3	1003.72	21.5	74.69	0.3	94.1	0.4	6.9	1.6	0	14.4	8.5	0.37	19.0122	2.8953	16.117	4
2019	5	16.3333	16	8	11.5	1004.19	276.8	49.57	0.6	89.6	0.4	7.5	1.9	0	16.5	9.4	0.34	17.5904	2.8187	14.7718	4
2019	5	16.375	16	9	13.2	1004.38	280.7	45.87	0.8	84.1	0.3	4.3	1.5	0.2	16.8	8.4	0.34	15.435	2.7421	12.6929	4
2019	5	16.4167	16	10	15.9	1004.08	300.6	50.14	0.8	75.5	0.3	3.2	1.4	0.4	19.2	10.3	0.38	11.5103	2.6655	8.8448	4
2019	5	16.4583	16	11	18.3	1003.62	285.6	80.17	0.5	65.5	0.1	1.1	1	1.3	19.6	8.9	0.26	8.10789	2.5889	5.519	4
2019	5	16.5	16	12	20.4	1002.84	359	35.43	1.6	58.3	0.1	0.5	0.6	2	15.6	7.3	0.17	4.88166	2.5123	2.3694	4
2019	5	16.5417	16	13	21.5	1002.16	355.1	34.39	1.7	51.8	0.1	0.4	0.6	2.5	13.4	6.1	0.14	2.96205	2.4357	0.5264	4
2019	5	16.5833	16	14	21.7	1001.61	353.8	66.02	1.2	49	0.1	0.3	0.5	2.6	16.5	8.4	0.16	2.35906	2.3591	0	4
2019	5	16.625	16	15	22.3	1001.17	39.5	50.7	0.9	45.9	0.1	0.3	0.6	2.7	20.1	12.1	0.18	2.38035	2.3804	0	4
2019	5	16.6667	16	16	22.1	1000.94	38.7	52.88	1.1	45.4	0.1	0.1	0.5	3	16.8	8.4	0.16	2.48294	2.4055	0.0774	4
2019	5	16.7083	16	17	20.8	1000.86	78.4	24.34	1.2	51.4	0.2	0.3	1.5	1.9	15.8	8.2	0.17	2.67263	2.4307	0.242	4
2019	5	16.75	16	18	18.8	1001.32	57.4	18.49	0.9	57.2	0.2	0.2	2	1.3	15.8	6.3	0.17	3.76922	2.4558	1.3134	4
2019	5	16.7917	16	19	17.2	1001.75	43.8	29.15	0.5	62.8	0.2	0.5	2.6	0.4	16.5	5.4	0.19	4.40317	2.481	1.9222	4
2019	5	16.8333	16	20	16	1002.21	102.5	87.24	0.1	69.7	0.3	2.5	3	0.1	14.6	4.8	0.23	5.94885	2.5061	3.4427	4
2019	5	16.875	16	21	14.8	1002.55	100.8	79.61	0.1	75	0.5	6.1	3.2	-0.1	19.9	9.2	0.31	8.8205	2.5313	6.2892	4
2019	5	16.9167	16	22	13.9	1002.8	123.9	77.23	0.3	78.1	0.7	9.1	3	0	27.4	13.6	0.4	12.0812	2.5565	9.5248	4
2019	5	16.9583	16	23	12.7	1002.62	90	60.97	0.2	82.3	0.7	10.5	2.8	0	27	13.3	0.45	15.0826	2.5816	12.501	4
2019	5	17	17	0	12	1002.56	116.2	67.36	0.4	84.3	0.6	9.8	2.6	0	32.7	18	0.51	17.2748	2.6068	14.668	4
2019	5	17.0417	17	1	11.1	1002.47	49.5	40.66	0.3	87.6	0.6	10.2	2.4	0	25.7	14.8	0.53	18.6395	2.6319	16.0075	4
2019	5	17.0833	17	2	10.4	1002.32	28.1	40.85	0.2	91	0.5	7.15	-9999	-9999	26.5	15.6	0.58	16.7783	2.6571	14.1212	4
2019	5	17.125	17	3	11	1002.21	256.1	53.98	0.3	87.4	0.4	4.1	2.3	-9999	23	13.7	0.47	18.2494	2.6823	15.5672	4
2019	5	17.1667	17	4	10.7	1002.09	279.4	33	0.6	85.7	0.3	2.6	1.9	0	14.7	8.2	0.43	20.2016	2.7074	17.4942	4
2019	5	17.2083	17	5	10	1002.15	5	65.1	0.3	87.8	0.3	3.2	1.7	0	17.1	11.1	0.46	20.6759	2.7326	17.9433	4
2019	5	17.25	17	6	9.7	1002.53	329.8	79.76	0.2	90	0.3	3.8	1.7	0	19.6	12.3	0.49	19.5899	2.7577	16.8322	4
2019	5	17.2917	17	7	10.2	1002.85	261.1	39.9	0.7	86.5	0.3	3.4	1.6	0	17.5	11.1	0.36	18.0945	2.7829	15.3117	4
2019	5	17.3333	17	8	10.8	1003.28	292.8	48.09	0.6	84.3	0.3	6.4	1.8	0	17.7	10.2	0.39	16.0068	2.808	13.1988	4
2019	5	17.375	17	9	13	1003.46	297.6	46.83	0.7	78.3	0.3	5.6	1.8	0.2	22.2	11	0.43	13.9946	2.8332	11.1614	4
2019	5	17.4167	17	10	15.7	1003.19	277.7	57.22	0.6	70	0.3	3.8	1.7	0.4	25.9	14.3	0.41	10.9333	2.8584	8.0749	4
2019	5	17.4583	17	11	18.7	1002.85	322.8	54.63	0.8	62	0.2	2.3	1.5	0.9	26.9	12.2	0.35	8.08435	2.8835	5.2008	4
2019	5	17.5	17	12	20.7	1002.18	321.4	67.9	0.6	56.1	0.1	0.6	0.8	1.8	21.6	9.1	0.21	5.64774	2.9087	2.7391	4
2019	5	17.5417	17	13	22.3	1001.53	357.7	36.35	1.5	51	0.1	0.5	0.7	2.2	18.1	9.1	0.18	4.13786	2.9338	1.204	4
2019	5	17.5833	17	14	22.8	1000.99	359.2	26.49	2	47	0.1	0.5	0.8	2.3	23.4	12	0.17	3.07417	2.959	0.1152	4
2019	5	17.625	17	15	23.5	1000.76	5.8	42.97	1.1	42.8	0.1	0.2	0.4	2.8	18.9	10.1	0.15	2.98415	2.9842	0	4
2019	5	17.6667	17	16	23.5	1000.64	20.6	57.13	0.8	41.8	0.1	0.1	0.5	3	15.5	8	0.15	3.31612	3.0573	0.2589	4
2019	5	17.7083	17	17	21.9	1000.77	44.6	28.25	1	50.8	0.1	0.1	1.1	2.1	14	6.1	0.18	3.41581	3.1304	0.2854	4
2019	5	17.75	17	18	19.6	1001.23	46.6	19.41	0.9	67.3	0.2	0.3	2.5	0.4	17.8	6.2	0.27	3.88134	3.2035	0.6779	4
2019	5	17.7917	17	19	18.2	1001.82	8.3	57.22	0.2	74.2	0.3	1.1	3	0	22.7	10	0.37	4.96051	3.2766	1.6839	4
2019	5	17.8333	17	20	16.9	1002.31	127.4	89.48	0.1	79.5	0.5	3.6	2.9	-0.1	23.3	11.8	0.4	7.24467	3.3497	3.895	4
2019	5	17.875	17	21	15.8	1002.97	160.9	72.53	0.2	83.1	0.5	4.4	2.8	0	29.8	14.9	0.4	9.98953	3.4228	6.5667	4
2019	5	17.9167	17	22	14.8	1003.42	135.3	71.83	0.2	85.9	0.5	5.5	2.7	0	25.4	13.3	0.43	12.5892	3.4959	9.0933	4
2019	5	17.9583	17	23	14	1003.55	57.3	70.42	0.2	88.3	0.8	8.8	2.7	0	28.9	16.2	0.59	15.1405	3.569	11.5715	4
2019	5	18	18	0	13	1003.32	56.7	45.04	0.2	91.7	0.9	15.4	2.7	0	37.6	22.5	0.71	17.5244	3.6421	13.8822	4
2019	5	18.0417	18	1	12.4	1003.17	34.8	53.78	0.2	93.8	0.7	9.1	2.2	0	35.1	20.6	0.64	16.5352	3.7152	12.82	4
2019	5	18.0833	18	2	12.7	1003.33	246.3	48.63	0.6	90.7	0.5	5.5	-9999	-9999	25.6	16	0.59	17.0278	3.7883	13.2395	4
2019	5	18.125	18	3	12.3	1003.38	266.4	38.49	0.7	87.3	0.3	1.9	1.8	-9999	26.1	17.5	0.5	16.5749	3.8614	12.7134	4
2019	5	18.1667	18	4	12.2	1003.22	253.1	37.84	0.7	87.1	0.3	1.3	1.6	-0.1	16.7	9.7	0.44	16.1529	3.9346	12.2183	4
2019	5	18.2083	18	5	11.7	1003.38	238.1	86.95	0.3	87.5	0.2	0.8	1.6	-0.1	16	10.1	0.44	17.9521	4.0077	13.9445	4
2019	5	18.25	18	6	10.7	1003.97	40	49.12	0.3	91.3	0.3	3.5	1.4	-0.1	19.8	13	0.47	17.7518	4.0808	13.671	4
2019	5	18.2917	18	7	10.8	1004.44	274.6	79.74	0.3	91.3	0.3	3.6	1.5	-0.1	24.6	13.2	0.5	15.4289	4.1539	11.275	4
2019	5	18.3333	18	8	12	1004.9	248.8	34.68	0.9	81.7	0.3	2.9	1.6	0.1	21.9	14.7	0.43	14.0264	4.227	9.7994	4
2019	5	18.375	18	9	13.9	1005.17	255.6	41.56	1	71.1	0.2	1.2	1.1	0.6	14.2	7.8	0.34	13.4718	4.3001	9.1717	4
2019	5	18.4167	18	10	16.1	1005.04	258.5	42.66	1	64.3	0.2	0.7	0.7	1.3	17.9	8.8	0.3	11.6377	4.3732	7.2645	4
2019	5	18.4583	18	11	18.5	1004.92	295.5	69.63	0.5	62.4	0.2	0.6	0.7	1.6	18.1	8.3	0.38	9.10627	4.4463	4.66	4
2019	5	18.5	18	12	20.4	1004.31	96.4	93.89	0.3	61.7	0.2	0.4	0.6	2.2	21.9	11	0.43	7.07422	4.5194	2.5548	4
2019	5	18.5417	18	13	21.9	1003.83	95.1	67.09	0.6	58.6	0.1	0.2	0.4	2.8	26	15	0.43	5.59822	4.5925	1.0057	4
2019	5	18.5833	18	14	22.9	1003.32	16.1	51.28	1	54.5	0.1	0.1	0.3	3.2	24.5	14.4	0.39	5.02427	4.6656	0.3586	4
2019	5	18.625	18	15	22.4	1002.91	101.2	31.45	1.8	56.1	0.1	0.1	0.3	3.3	22.2	12.4	0.4	4.73874	4.7387	0	3
2019	5	18.6667	18	16	21.3	1002.86	103.6	20.34	2.1	64	0.1	0	0.1	3.4	23.5	13.4	0.43	4.92457	4.6247	0.2998	3
2019	5	18.7083	18	17	20.1	1003.2	110.3	19.54	1.8	68.5	0.1	0.1	0.2	3.4	20.9	12.9	0.41	5.38914	4.5107	0.8784	3
2019	5	18.75	18	18	18.7	1003.61	102.2	26.02	0.8	74.6	0.1	0	0.4	2.9	18.1	10.5	0.48	6.64155	4.3967	2.2448	3
2019	5	18.7917	18	19	17.2	1004.07	183.1	77.26	0.2	81.1	0.2	0.3	1.3	1.7	20.2	12.5	0.61	7.12548	4.2827	2.8428	3
2019	5	18.8333	18	20	16.7	1004.48	196.4	76.93	0.3	82.8	0.2	0.6	2.1	1	22.7	14.5	0.66	7.89009	4.1687	3.7214	3
2019	5	18.875	18	21	16.4	1004.93	251.9	28.39	0.8	83.9	0.5	0.8	2.8	0.1	24	15.9	0.87	8.77858	4.0547	4.7239	3
2019	5	18.9167	18	22	15.9	1005.23	245.3	33.24	0.8	84.7	0.5	0.7	2.6	0.1	33.2	24.4	1.01	9.38736	3.9407	5.4467	3
2019	5	18.9583	18	23	15.4	1005.35	246	75.01	0.3	86.6	0.4	0.2	2.2	0.3	35.4	27.3	1	10.2643	3.8266	6.4376	3
2019	5	19	19	0	15.7	1005.22	205.7	50.64	0.6	85.2	0.3	0.1	1.7	0.6	31.6	24.2	0.89	10.8324	3.7126	7.1197	3
2019	5	19.0417	19	1	15.7	1004.8	223	56.39	0.4	85.4	0.3	0.2	1.6	0.4	27.6	20.9	0.81	11.3231	3.5986	7.7245	3
2019	5	19.0833	19	2	15.6	1004.39	210.5	43.82	0.6	85.4	0.25	0.1	-9999	-9999	26.3	20.1	0.82	11.7228	3.4846	8.2382	3
2019	5	19.125	19	3	15.4	1004.35	268.7	66.3	0.4	85.9	0.2	0	1.5	0.2	23.1	17.8	0.71	11.8999	3.3706	8.5293	3
2019	5	19.1667	19	4	15.1	1004.24	241.7	57.43	0.5	86	0.2	0	1.3	0.5	22.6	17.9	0.66	12.0131	3.2566	8.7566	3
2019	5	19.2083	19	5	14.3	1004.22	189	82.31	0.4	87.1	0.2	0.2	1.3	0.5	20.1	15.6	0.57	13.2085	3.1426	10.0659	3
2019	5	19.25	19	6	13.5	1004.79	275.2	44.29	0.6	89.4	0.2	0	1.1	0.5	16.4	12.7	0.67	15.362	3.0286	12.3334	3
2019	5	19.2917	19	7	13	1005.27	224.3	46.05	0.6	89.4	0.2	0.1	1	0.3	21.1	17	0.71	14.1841	2.9145	11.2695	3
2019	5	19.3333	19	8	13.8	1005.59	165.2	75.79	0.4	86	0.2	0.6	1.2	0.4	18.1	13.9	0.57	12.4796	2.8005	9.6791	3
2019	5	19.375	19	9	15.7	1005.67	256.6	54.56	0.7	78.9	0.2	0.8	1.1	0.8	18.1	13.7	0.49	10.4471	2.6865	7.7606	3
2019	5	19.4167	19	10	17.9	1005.63	164.7	79.62	0.4	72.8	0.2	0.6	0.8	1.3	15.5	10.9	0.42	8.16197	2.5725	5.5895	3
2019	5	19.4583	19	11	19.9	1005.29	145.8	47.46	0.7	67.8	0.1	0.2	0.4	2.2	13.8	8.4	0.35	5.8807	2.4585	3.4222	3
2019	5	19.5	19	12	21.2	1004.58	109.3	45.68	0.9	58.2	0.1	0.1	0.1	3	11.5	6.1	0.22	4.03691	2.3445	1.6924	3
2019	5	19.5417	19	13	21.7	1003.97	85.8	47.87	1.1	54.4	0.1	0	0.1	3.3	10.9	6.5	0.21	3.21809	2.2305	0.9876	3
2019	5	19.5833	19	14	22.1	1003.48	77.3	56.88	0.9	52.7	0.1	0	0.1	3.4	12.9	7.7	0.21	2.50767	2.1165	0.3912	3
2019	5	19.625	19	15	21.6	1003.05	114.7	26.28	1.8	54.4	0.1	0.1	0.2	3	12.6	7.3	0.18	2.00243	2.0024	0	4
2019	5	19.6667	19	16	20.9	1002.97	101.5	20.44	1.7	54.8	0.1	0	0.3	2.8	10.3	5.5	0.17	1.96565	1.9656	0	4
2019	5	19.7083	19	17	20.2	1002.9	83.3	24.88	1.3	56.8	0.1	0.1	0.5	2.4	9.8	4.7	0.18	2.60153	2.0571	0.5444	4
2019	5	19.75	19	18	18.8	1003.07	40.3	21.31	0.8	67.8	0.1	0	0.6	2.2	13.3	7.9	0.27	3.90911	2.1486	1.7605	4
2019	5	19.7917	19	19	17.6	1003.35	0	57.83	0.2	74.4	0.2	0	1.2	1.3	13.9	8.1	0.39	5.62223	2.2401	3.3821	4
2019	5	19.8333	19	20	16	1003.55	84.9	66.98	0.1	81.1	0.2	0.9	1.6	0.5	15.5	9.2	0.45	8.13384	2.3316	5.8023	4
2019	5	19.875	19	21	15.3	1003.81	83.5	63.15	0.1	82.7	0.4	2.6	2.2	-0.1	22	13.4	0.44	11.2659	2.423	8.8428	4
2019	5	19.9167	19	22	14.7	1003.89	67.8	50.65	0.2	83.6	0.4	1.8	2	-0.1	22.1	14.1	0.44	13.4997	2.5145	10.9852	4
2019	5	19.9583	19	23	13.9	1003.69	47.9	40.16	0.2	87.3	0.4	3.9	2	-0.1	21.5	14.2	0.5	16.1671	2.606	13.5611	4
2019	5	20	20	0	13.4	1003.35	21.7	91.42	0.1	89.5	0.4	7.7	2	-0.1	23.2	14.7	0.59	19.063	2.6975	16.3655	4
2019	5	20.0417	20	1	12.8	1003.04	49.2	52.77	0.3	90.8	0.7	8.7	1.7	-0.1	26.3	16.5	0.72	20.567	2.789	17.7781	4
2019	5	20.0833	20	2	12.3	1003.01	33	55.18	0.3	92.5	0.75	10.1	-9999	-9999	29.7	19.4	0.82	21.8098	2.8804	18.9293	4
2019	5	20.125	20	3	11.6	1002.88	36.8	32.79	0.3	94.4	0.8	11.5	1.3	-9999	31.2	22.4	0.82	22.1727	2.9719	19.2008	4
2019	5	20.1667	20	4	11.2	1002.61	17.7	54.19	0.3	95.3	0.6	6.5	1.4	-0.1	27.7	20.7	0.78	21.4362	3.0634	18.3728	4
2019	5	20.2083	20	5	10.9	1002.49	29	60.09	0.2	96.1	0.5	8	1.4	-0.1	24.6	18.4	0.79	21.7391	3.1549	18.5842	4
2019	5	20.25	20	6	10.5	1002.67	18.8	54.05	0.3	96.7	0.6	7.2	1.2	-0.1	25.6	17.9	0.77	22.7766	3.2463	19.5303	4
2019	5	20.2917	20	7	10.7	1002.81	6.4	62.59	0.2	96.2	0.6	8.2	1.3	-0.1	26.8	17.2	0.86	21.9568	3.3378	18.619	4
2019	5	20.3333	20	8	11.1	1002.96	18	34.97	0.4	96	0.8	11.5	1.7	-0.1	34	20.3	0.95	18.0476	3.4293	14.6183	4
2019	5	20.375	20	9	13	1003.22	16.9	24.74	0.8	91.1	0.7	9.8	2.2	0	37.2	23.8	1.45	14.752	3.5208	11.2312	4
2019	5	20.4167	20	10	15.3	1002.95	345.1	54.68	0.6	81.1	0.6	5.1	2.2	0.2	46.8	35.3	1.88	11.6752	3.6123	8.0629	4
2019	5	20.4583	20	11	17.2	1002.34	1.3	64.49	0.7	73.3	0.5	3	2.1	0.5	57.7	48.2	2.62	9.92333	3.7037	6.2196	4
2019	5	20.5	20	12	19.2	1001.47	12.3	69.77	0.4	65.3	0.4	3.1	2.5	0.5	66.7	57	2.13	7.67207	3.7952	3.8768	4
2019	5	20.5417	20	13	21.3	1000.73	50.6	71.89	0.6	59	0.3	2.2	2.4	1.1	58.2	45	1.56	5.58824	3.8867	1.7015	4
2019	5	20.5833	20	14	23.1	1000.09	79.6	68.28	0.7	50.8	0.2	1.2	1.8	1.7	46.2	32	0.74	4.27387	3.9782	0.2957	4
2019	5	20.625	20	15	22.4	999.582	65.9	30.49	0.8	48.6	0.2	0.3	1.5	2.1	38.6	24.6	0.82	4.06965	4.0696	0	4
2019	5	20.6667	20	16	22.2	999.398	41.1	20.2	0.9	49.1	0.2	0.4	2.2	1.3	43.4	24.2	0.74	4.38613	4.1909	0.1952	4
2019	5	20.7083	20	17	20.9	999.32	45.6	16.46	0.8	57.1	0.3	0.6	2.8	0.4	39	20.7	0.58	4.78586	4.3122	0.4736	4
2019	5	20.75	20	18	19.3	999.479	119.4	80.78	0.1	68.7	0.5	1.4	3.2	-0.1	35.6	17.3	0.57	6.90161	4.4335	2.4681	4
2019	5	20.7917	20	19	17.2	999.975	68.6	82.89	0.1	77.4	0.7	3.8	3.1	-0.1	32.6	17.6	0.64	8.51213	4.5548	3.9573	4
2019	5	20.8333	20	20	15.8	1000.16	73.7	74.37	0.1	83.8	0.9	10.5	3.4	-0.1	40.9	22.4	0.86	10.9947	4.6761	6.3186	4
2019	5	20.875	20	21	14.9	1000.53	43.8	76.35	0.1	87.5	1	16.6	3.3	-0.1	51.1	29.6	0.96	13.6089	4.7974	8.8115	4
2019	5	20.9167	20	22	13.8	1000.81	47.1	56.94	0.2	90.9	1	14.9	2.9	-0.1	51.1	30.9	0.99	16.709	4.9187	11.7902	4
2019	5	20.9583	20	23	12.9	1000.65	37.5	43.56	0.3	93.6	1.2	23.6	2.8	-0.1	47.7	28.3	1.15	18.7812	5.04	13.7411	4
2019	5	21	21	0	12.1	1000.61	30.4	72.72	0.2	94.7	1.6	27.2	2.7	-0.1	56.1	33.1	1.27	21.316	5.1613	16.1547	4
2019	5	21.0417	21	1	11.4	1000.19	55.9	54.06	0.3	94.9	1.3	19.1	2.2	-0.1	61.8	39.5	1.19	23.3379	5.2826	18.0552	4
2019	5	21.0833	21	2	10.9	1000.19	55.6	50.86	0.3	95.9	1	16.15	-9999	-9999	50.9	32.7	1.2	24.4422	5.4039	19.0383	4
2019	5	21.125	21	3	10.7	1000.14	77.1	58.59	0.3	95.2	0.7	13.2	1.6	-9999	46.5	29.2	1.21	25.5727	5.5252	20.0474	4
2019	5	21.1667	21	4	10.7	1000.03	335.1	97.95	0.1	94.3	0.6	10.5	1.5	-0.1	43.5	28.9	1.28	27.6894	5.6465	22.0428	4
2019	5	21.2083	21	5	10	1000.18	68	57.62	0.2	94.9	0.5	9.9	1.2	-0.1	42.6	29.9	1.25	29.2022	5.7678	23.4343	4
2019	5	21.25	21	6	9.5	1000.37	42.1	60.29	0.2	95.7	0.6	12	1.3	-0.1	49.6	36.2	1.3	30.6036	5.8891	24.7145	4
2019	5	21.2917	21	7	9.2	1000.79	37	53.39	0.3	95.8	0.9	17.5	1.4	-0.1	53.7	32.9	1.35	27.8065	6.0104	21.796	4
2019	5	21.3333	21	8	10.6	1001.28	311.9	63.97	0.3	91.9	0.9	17.9	2	-0.1	57.6	33.8	1.47	22.2838	6.1317	16.1521	4
2019	5	21.375	21	9	13.5	1001.47	278.1	50.04	0.6	76.8	0.4	6.1	2.3	0.2	48.2	35.4	1.09	19.3502	6.253	13.0972	4
2019	5	21.4167	21	10	16.1	1001.37	319.6	56.66	0.7	69.1	0.3	3	1.4	0.5	34.7	25.7	0.93	16.796	6.3743	10.4217	4
2019	5	21.4583	21	11	18.7	1000.81	336.5	82.84	0.4	60.7	0.4	1.6	1.3	1.3	37.2	27.3	2.88	14.2128	6.4956	7.7171	4
2019	5	21.5	21	12	21.6	1000.24	303.8	66.75	0.5	53.1	0.5	1.1	1.8	2.2	87.6	75	4.69	11.525	6.6169	4.9081	4
2019	5	21.5417	21	13	24.2	999.637	357.9	48	1.2	46.1	0.5	0.5	1.4	3.1	115.2	99.1	4.29	9.48085	6.7382	2.7426	4
2019	5	21.5833	21	14	25.2	999.148	355.3	32.84	1.6	43	0.3	1.2	1.9	2.1	96.5	73.8	2.05	7.13861	6.8595	0.2791	4
2019	5	21.625	21	15	25.8	998.771	354.6	27.64	1.5	38.9	0.3	0.1	0.3	4.4	65.3	48	3.16	6.98084	6.9808	0	4
2019	5	21.6667	21	16	24.8	998.842	356.9	24.58	0.8	43.4	0.6	0.1	1.5	3.8	115	101.5	4.8	8.30778	6.9004	1.4074	4
2019	5	21.7083	21	17	23.4	999.005	19.6	27.84	0.4	49.8	0.6	0.5	3.5	0.7	117.8	101.2	3.58	9.1595	6.8199	2.3396	4
2019	5	21.75	21	18	21.5	999.34	307.2	77.79	0.1	55.9	0.8	2.1	4.1	0	101.8	80.9	3.31	10.2687	6.7395	3.5292	4
2019	5	21.7917	21	19	19.8	999.948	305.6	55.67	0.2	62.8	1.1	5.2	4	-0.1	93	75.3	2.99	11.583	6.659	4.924	4
2019	5	21.8333	21	20	18.7	1000.4	106.4	77.26	0.2	67.8	1.1	9.3	3.8	-0.1	82.4	66.1	2.7	14.2805	6.5786	7.7019	4
2019	5	21.875	21	21	17.1	1000.66	80.5	69.42	0.2	75.5	1.2	10.9	3.7	-0.1	96.5	71.7	3.41	17.3747	6.4981	10.8766	4
2019	5	21.9167	21	22	15.7	1001.02	57.3	77.59	0.1	81.7	1.3	12.4	3.5	-0.1	111.3	83.2	3.48	19.8205	6.4177	13.4028	4
2019	5	21.9583	21	23	14.7	1001.1	43.9	68.62	0.3	85.3	1.6	18.5	3.4	-0.1	106.3	79	3.26	22.4696	6.3372	16.1323	4
2019	5	22	22	0	13.7	1001.09	41.4	55.21	0.2	91.4	1.5	17.3	2.7	-0.1	103.5	76.5	3.34	24.1024	6.2568	17.8456	4
2019	5	22.0417	22	1	13.3	1001.15	148	69.28	0.3	91.8	1	12	2.3	-0.1	93.4	73.3	3.33	27.819	6.1763	21.6426	4
2019	5	22.0833	22	2	12.8	1001.25	53.4	42.65	0.3	90.4	1.1	14.15	-9999	-9999	89.9	70.9	3.3	29.7072	6.0959	23.6114	4
2019	5	22.125	22	3	11.9	1001.28	41.2	58.27	0.3	92.4	1.2	16.3	2.3	-9999	84.1	66.7	2.48	31.37	6.0154	25.3546	4
2019	5	22.1667	22	4	12	1001.28	134.7	63.15	0.3	90.2	0.9	16.3	1.9	-0.1	69.7	53.9	2.68	34.4914	5.935	28.5564	4
2019	5	22.2083	22	5	11.3	1001.45	42.9	70.51	0.2	91.6	0.6	11.3	1.6	-0.1	79.2	65.5	2.7	34.3869	5.8545	28.5323	4
2019	5	22.25	22	6	11.6	1001.85	347.4	76.15	0.1	88.5	0.7	13.9	1.8	-0.1	66	52.9	1.99	33.9358	5.7741	28.1618	4
2019	5	22.2917	22	7	10.7	1002.38	28.7	29.85	0.4	92.1	1	19.9	1.8	-0.1	73.7	48.5	1.91	31.6652	5.6936	25.9716	4
2019	5	22.3333	22	8	11.9	1002.9	37.3	33.23	0.3	86.8	1.2	21.4	2.1	-0.1	62.7	43.8	1.49	23.8719	5.6132	18.2588	4
2019	5	22.375	22	9	15.5	1002.93	266.7	83.34	0.2	69.1	0.6	9.7	2.2	0	50.2	32.8	0.63	19.0355	5.5327	13.5028	4
2019	5	22.4167	22	10	18	1002.86	41.9	59.98	0.6	61.9	0.5	8.7	2.5	0.1	37.8	21.8	0.58	15.7031	5.4523	10.2509	4
2019	5	22.4583	22	11	20.5	1002.69	22.5	101.28	0.1	54.1	0.4	6.5	2.7	0.2	40	21	0.52	12.2236	5.3718	6.8518	4
2019	5	22.5	22	12	22.2	1002.23	115.8	54.22	0.8	47.6	0.2	3.2	2.2	0.8	38.2	17.5	0.37	9.23584	5.2914	3.9445	4
2019	5	22.5417	22	13	24	1001.64	107.9	32.29	1.4	42.6	0.2	1.7	1.9	1.3	27	10	-9999	7.56046	5.2109	2.3495	4
2019	5	22.5833	22	14	24.5	1001.25	96.8	25.97	2.1	48	0.2	1	1.4	2.1	28.3	10.1	0.26	5.73021	5.1305	0.5997	4
2019	5	22.625	22	15	23.3	1001.15	99.5	23.3	2.2	56.8	0.1	0.2	0.1	2.9	29.7	10.5	0.19	5.36823	5.05	0.3182	3
2019	5	22.6667	22	16	22.3	1001.23	112	24.13	2.1	58.5	0.1	0.1	0.1	2.8	23.2	9.1	0.18	5.29273	4.9696	0.3232	3
2019	5	22.7083	22	17	21	1001.57	114.9	35.34	1.2	65.7	0.1	0.1	0.3	2.3	23.4	11.4	0.19	4.88912	4.8891	0	3
2019	5	22.75	22	18	19.6	1002.02	167.6	32.34	0.7	77	0.1	0.1	0.8	1.3	19.2	8.7	0.28	4.92299	4.8782	0.0448	3
2019	5	22.7917	22	19	18.8	1002.4	170.7	81.46	0.2	82.4	0.2	0.1	1.6	0.5	20.5	8.3	0.35	5.38659	4.8673	0.5193	3
2019	5	22.8333	22	20	18.3	1002.67	264.6	30.11	0.7	83.6	0.3	0.8	2.1	0.1	20.7	10	0.36	6.22863	4.8564	1.3722	3
2019	5	22.875	22	21	17.6	1002.94	256.6	57.56	0.5	83.8	0.3	1.9	2.2	-0.1	23.1	12.1	0.43	7.69107	4.8455	2.8456	3
2019	5	22.9167	22	22	16.7	1003.01	161.7	66.96	0.4	86.4	0.3	2.8	2.1	-0.1	25.9	13.9	0.45	9.52517	4.8346	4.6906	3
2019	5	22.9583	22	23	15.9	1002.95	164.8	57.63	0.4	88.4	0.4	5.4	2.1	-0.2	25.4	13.2	0.48	10.5463	4.8237	5.7226	3
2019	5	23	23	0	15.6	1002.97	167.1	56.25	0.4	87.6	0.3	5	2.1	-0.1	26	13.8	0.51	10.9382	4.8128	6.1255	3
2019	5	23.0417	23	1	15.5	1002.74	213.3	53.01	0.5	83.7	0.2	1.4	1.6	-0.1	23.5	13.7	0.37	11.1154	4.8019	6.3135	3
2019	5	23.0833	23	2	15.2	1002.75	237	76.81	0.2	83.6	0.15	0.75	-9999	-9999	20	9.2	0.43	11.5906	4.791	6.7996	3
2019	5	23.125	23	3	14.7	1002.47	265.4	44.57	0.6	85.1	0.1	0.1	1.5	-0.2	19.6	10.6	0.3	12.6097	4.7801	7.8297	3
2019	5	23.1667	23	4	14.2	1002.49	260.4	61.07	0.5	86	0.1	0.5	1.6	-0.1	16.8	8.9	0.33	12.1181	4.7692	7.3489	3
2019	5	23.2083	23	5	14.6	1002.49	247.9	59.8	0.5	83.9	0.1	0.6	1.6	-0.1	17.1	9.5	0.3	11.5915	4.7583	6.8333	3
2019	5	23.25	23	6	14.2	1002.69	166.9	91.02	0.3	85.3	0.1	1.8	1.8	-0.1	13.2	7.2	0.27	11.8567	4.7474	7.1094	3
2019	5	23.2917	23	7	13.9	1003.02	249.1	38.29	0.7	85.6	0.2	3.5	1.8	-0.1	11.8	6.3	0.28	12.1713	4.7364	7.4348	3
2019	5	23.3333	23	8	13.9	1003.54	57.7	77.82	0.2	85.9	0.5	9.6	2.2	0	19.7	9.6	0.37	11.7802	4.7255	7.0547	3
2019	5	23.375	23	9	15.8	1003.41	255.7	42.92	0.8	78.5	0.3	5.4	1.9	0.1	26.8	13	0.34	11.1492	4.7146	6.4345	3
2019	5	23.4167	23	10	18.1	1003.35	251.3	56.83	0.7	71.6	0.2	2.3	1.4	0.5	23	9.2	0.34	9.78545	4.7037	5.0817	3
2019	5	23.4583	23	11	20	1003.13	244.5	82.52	0.4	66.2	0.1	1.2	1	1.2	23.4	10.5	0.47	8.2717	4.6928	3.5789	3
2019	5	23.5	23	12	21.4	1002.31	321	61.39	0.8	61.7	0.1	0.6	0.8	2	29.6	16.3	0.75	6.1753	4.6819	1.4934	3
2019	5	23.5417	23	13	22.5	1001.68	10.3	101.19	0.2	57.2	0.1	0.2	0.2	3	25.4	13.7	0.54	5.37196	4.671	0.7009	3
2019	5	23.5833	23	14	22.7	1000.96	60.5	44.83	1.1	55.6	0.1	0.3	0.6	3.1	26	15.5	0.57	5.13095	4.6601	0.4708	3
2019	5	23.625	23	15	22.7	1000.36	59.7	58.46	0.7	55.2	0.1	0.2	0.9	2.9	31.8	15.9	0.56	5.10869	4.6492	0.4595	4
2019	5	23.6667	23	16	22.6	1000.11	75.8	30.85	1	55.8	0.1	0.5	1.5	2.4	35.4	16.6	0.52	4.6383	4.6383	0	4
2019	5	23.7083	23	17	21	1000.16	97.1	19.22	1.4	66.6	0.2	0.4	2	1.5	30.5	15.4	0.3	4.79993	4.7359	0.064	4
2019	5	23.75	23	18	19.7	1000.41	97.2	31.27	0.9	72	0.3	1	3.1	0.2	25.3	11.4	0.32	5.78521	4.8335	0.9517	4
2019	5	23.7917	23	19	18.5	1000.68	138.6	77.71	0.2	77.6	0.4	1.6	3.2	-0.1	27.8	11.8	0.38	7.56801	4.9311	2.6369	4
2019	5	23.8333	23	20	17.1	1000.82	24	51.21	0.2	83.9	0.5	6.5	3.1	-0.1	27.4	12.6	0.44	8.86204	5.0288	3.8333	4
2019	5	23.875	23	21	16.6	1001.03	215.8	81.88	0.2	86.3	0.6	8	3	-0.1	34.3	14.5	0.51	9.87443	5.1264	4.748	4
2019	5	23.9167	23	22	16.2	1001.04	160.1	83.36	0.2	86.6	0.6	7.9	3	-0.1	32.6	16.8	0.51	12.5748	5.224	7.3508	4
2019	5	23.9583	23	23	15	1000.88	117.7	79.55	0.2	90.3	0.5	7.9	2.5	-0.1	31.2	16.4	0.49	15.911	5.3216	10.5894	4
2019	5	24	24	0	13.9	1000.68	26.5	51.98	0.2	94.6	0.6	9.4	2.1	-0.1	25.8	13.8	0.51	17.929	5.4192	12.5098	4
2019	5	24.0417	24	1	13.2	1000.28	34.2	48.9	0.2	95.7	0.8	13.3	1.9	-0.1	29.9	16.3	0.58	17.9416	5.5168	12.4247	4
2019	5	24.0833	24	2	12.9	999.925	233.7	100.41	0.1	96.6	0.55	8.1	-9999	-9999	28.7	17.8	0.65	16.6727	5.6145	11.0582	4
2019	5	24.125	24	3	13.4	999.793	251	30.59	0.8	94	0.3	2.9	1.9	-9999	25.4	16.8	0.66	17.4954	5.7121	11.7833	4
2019	5	24.1667	24	4	12.8	999.417	284.6	64.71	0.4	93.3	0.2	2.5	1.6	-0.2	20.6	13.4	0.57	20.9826	5.8097	15.1729	4
2019	5	24.2083	24	5	11.5	999.353	21	66.14	0.2	95.2	0.3	6.3	1.1	-0.2	19.1	10.4	0.64	24.3188	5.9073	18.4115	4
2019	5	24.25	24	6	10.6	999.463	49.6	60.21	0.3	96.7	0.5	13	1.2	-0.2	25.8	13.2	0.75	25.5712	6.0049	19.5663	4
2019	5	24.2917	24	7	10.5	999.913	352.2	73.49	0.2	97.2	0.6	10.8	1.5	-0.2	33.7	19.2	0.9	22.9309	6.1025	16.8283	4
2019	5	24.3333	24	8	11.5	1000.21	280.6	58.22	0.6	94.2	0.4	6.7	1.8	-0.1	31.9	22.9	1.12	21.2874	6.2002	15.0873	4
2019	5	24.375	24	9	13	1000.21	291.4	43.03	0.8	84.7	0.4	3.8	1.8	0.1	34.2	26.9	1.25	20.1986	6.2978	13.9008	4
2019	5	24.4167	24	10	15.3	1000.06	287.2	51.69	0.7	71.5	0.2	1.6	1.3	0.7	35.4	27.8	1.07	17.1663	6.3954	10.7709	4
2019	5	24.4583	24	11	18	999.296	353	40.9	1.2	67	0.4	1.1	1.1	1.4	40.4	32.7	3.09	13.5164	6.493	7.0234	4
2019	5	24.5	24	12	20.5	998.318	354.4	43.66	1.2	57.9	0.5	1.2	1.9	1.9	87.9	75.1	3.5	10.215	6.5906	3.6244	4
2019	5	24.5417	24	13	22.7	997.734	350	42.19	1.2	46.2	0.4	1	2	2.5	76.8	59.1	2.48	8.09636	6.6882	1.4081	4
2019	5	24.5833	24	14	23.5	997.086	358.8	34.79	1.4	39.2	0.3	0.3	1	3	65.9	50.1	1.57	6.78586	6.7859	0	4
2019	5	24.625	24	15	23.4	996.856	359.5	22.69	1.5	40	0.2	0.2	1	2.8	50.2	35.1	1.16	7.51562	6.7133	0.8024	4
2019	5	24.6667	24	16	23	996.879	345.9	23.97	0.7	39.9	0.2	0.3	1.8	1.7	40.6	24.3	0.78	10.2537	6.6407	3.6131	4
2019	5	24.7083	24	17	21.2	996.961	320.5	35.66	0.4	45.3	0.5	1.8	3.3	0.2	33.4	20.9	0.7	10.5818	6.5681	4.0138	4
2019	5	24.75	24	18	19.5	997.308	314.7	22.86	0.5	49.8	0.8	5.9	3.9	-0.1	34.9	21	0.71	10.4908	6.4955	3.9954	4
2019	5	24.7917	24	19	18.6	997.708	147	90.39	0.1	54.9	0.9	7.3	3.8	-0.1	37.2	20.2	0.9	13.105	6.4229	6.6822	4
2019	5	24.8333	24	20	16.4	997.957	64.6	64.73	0.2	69.1	1.1	13.6	3.7	-0.2	63	32	1.3	15.5682	6.3503	9.218	4
2019	5	24.875	24	21	15.1	998.098	74.6	62.63	0.2	78	0.9	10.5	3.2	-0.1	68.9	33.4	1.25	19.0535	6.2777	12.7759	4
2019	5	24.9167	24	22	13.5	997.921	22.9	66.27	0.3	84.2	1	13.3	2.9	-0.1	65	34.8	1.41	20.7966	6.2051	14.5916	4
2019	5	24.9583	24	23	12.7	997.761	58.5	52.43	0.2	86.3	1.4	16.7	2.9	-0.1	67.7	37.6	1.41	22.7808	6.1325	16.6483	4
2019	5	25	25	0	11.7	997.65	57.8	55.44	0.2	90.6	1.5	18.9	2.4	-0.1	64.1	38.5	1.48	27.2794	6.0599	21.2195	4
2019	5	25.0417	25	1	11.1	997.377	126.6	80.22	0.1	91.9	0.8	8.9	1.6	-0.2	56.9	36.1	1.45	31.3822	5.9873	25.3949	4
2019	5	25.0833	25	2	10.2	997.303	45.6	45.24	0.3	91.6	0.95	10.5	-9999	-9999	44.1	29.6	1.49	33.285	5.9147	27.3703	4
2019	5	25.125	25	3	9.5	997.004	38.7	57.92	0.3	93.3	1.1	12.1	1.3	-0.1	47.9	34.7	1.58	32.653	5.8421	26.8109	4
2019	5	25.1667	25	4	9.3	996.951	74	62.4	0.2	91.8	0.8	9.3	1.4	0	52.4	37.8	1.72	31.8003	5.7695	26.0308	4
2019	5	25.2083	25	5	8.9	996.835	22	55.74	0.4	91.2	0.8	8	1.3	0	52.7	41.6	1.78	29.5936	5.6969	23.8966	4
2019	5	25.25	25	6	8.7	997.054	37.4	41.2	0.3	89.1	0.6	5.1	1.3	0	50.3	39.8	1.93	27.4207	5.6243	21.7964	4
2019	5	25.2917	25	7	8.6	997.251	24.3	67.66	0.2	87.5	0.6	5	1.1	0	50.3	38.9	1.55	22.351	5.5517	16.7993	4
2019	5	25.3333	25	8	10.6	997.39	249.9	48.22	0.5	76.3	0.5	3.5	1.3	0.1	39	30.7	1.11	20.423	5.4791	14.9439	4
2019	5	25.375	25	9	12.4	997.233	273.1	48.5	0.6	69.1	0.4	3.5	1.4	0.3	33	25.2	1.06	18.6895	5.4065	13.283	4
2019	5	25.4167	25	10	15.1	996.942	291.7	53.76	0.6	60.4	0.3	2.4	1.3	0.6	32.4	22.5	0.7	15.9214	5.3339	10.5875	4
2019	5	25.4583	25	11	18	996.243	314	79.54	0.4	49.8	0.2	1.1	1	1.2	23.4	14.7	0.42	13.2995	5.2613	8.0381	4
2019	5	25.5	25	12	20.8	995.385	316.9	73.68	0.4	43.9	0.2	1	1.1	1.6	22.2	13.5	0.48	10.4539	5.1887	5.2652	4
2019	5	25.5417	25	13	23.2	994.741	22.2	60.87	0.9	38	0.2	0.9	1.3	1.9	27.2	16.6	0.52	7.41289	5.1161	2.2968	4
2019	5	25.5833	25	14	24.5	993.948	10.3	34.18	1.3	32.2	0.2	0.3	0.4	2.9	24.7	13.5	0.33	5.51103	5.0435	0.4675	4
2019	5	25.625	25	15	25.6	993.492	11.3	33.08	1.3	28.5	0.1	0.1	0	3.3	20.8	13.1	0.24	4.97095	4.971	0	4
2019	5	25.6667	25	16	25.3	993.28	356.5	34.9	1.2	28.5	0.1	0	0	3.4	16.4	10.3	0.23	6.23498	4.8701	1.3649	4
2019	5	25.7083	25	17	23.3	993.211	342.4	31.37	0.6	33.3	0.2	0	1.1	2.2	19	12.4	0.26	7.61612	4.7692	2.8469	4
2019	5	25.75	25	18	19.4	993.397	319.9	46.13	0.2	44.7	0.5	0.5	2.8	0.3	20.3	11.7	0.42	9.68154	4.6684	5.0132	4
2019	5	25.7917	25	19	17.1	993.689	345.7	51.61	0.2	53.5	0.8	6.9	3.2	0	27.3	15.7	0.69	11.8805	4.5675	7.313	4
2019	5	25.8333	25	20	16.5	993.965	117.7	81.91	0.1	54.7	0.8	8.6	3	0	40.8	24.7	0.66	15.269	4.4666	10.8024	4
2019	5	25.875	25	21	14.4	994.028	99.6	46.62	0.2	68	0.6	4.2	2.2	0	32.9	19.3	0.61	19.6776	4.3658	15.3119	4
2019	5	25.9167	25	22	13.2	994.027	75.7	53.8	0.2	69.5	0.6	4.2	2.2	0	31.4	17.5	0.53	22.5251	4.2649	18.2602	4
2019	5	25.9583	25	23	12.5	993.819	131.2	85.31	0.1	71.8	0.7	7.1	2.1	0	36.1	19	0.58	26.8418	4.164	22.6778	4
2019	5	26	26	0	11.6	993.554	98.6	52.02	0.3	77.2	0.6	5	1.6	0	32.7	20	0.55	30.63	4.0632	26.5669	4
2019	5	26.0417	26	1	10.5	993.072	79.7	45.99	0.2	80.9	0.6	4.3	1.4	0	25.6	15.4	0.53	34.2498	3.9623	30.2875	4
2019	5	26.0833	26	2	10	992.645	121.6	54.07	0.3	80.9	0.45	4.15	-9999	-9999	28.2	16.8	0.49	34.7947	3.8614	30.9333	4
2019	5	26.125	26	3	9.6	992.335	145.6	55.75	0.4	79.9	0.3	4	1.3	-0.2	23.4	15	0.5	34.6931	3.7606	30.9325	4
2019	5	26.1667	26	4	9	991.838	113.8	64.63	0.3	82.1	0.4	4.8	1.1	0	22.6	15.8	0.54	34.8305	3.6597	31.1708	4
2019	5	26.2083	26	5	8.4	991.577	102.7	67.86	0.3	83.4	0.4	3.1	1	0	24.6	17.2	0.6	32.8899	3.5588	29.3311	4
2019	5	26.25	26	6	8.6	991.821	185.4	113.94	0.1	82.3	0.4	2.7	0.9	0	26.2	17.6	0.57	23.2122	3.458	19.7543	4
2019	5	26.2917	26	7	12.3	992.792	230.7	48.29	0.9	65	0.2	0.2	1.3	0.6	22.3	14.3	0.25	21.5698	3.3571	18.2127	4
2019	5	26.3333	26	8	12.1	993.427	199.5	103.61	0.3	67.7	0.2	0.5	1.2	0.3	13.5	7.7	0.42	20.7935	3.2562	17.5373	4
2019	5	26.375	26	9	12.9	994.167	24.7	108.95	0.4	68	0.3	1.4	1.5	0.2	18	11.1	0.49	18.2006	3.1554	15.0452	4
2019	5	26.4167	26	10	13.8	993.432	11.4	21.6	1.4	71.1	0.3	1.1	1.2	0.6	17.9	10.6	0.51	13.2355	3.0545	10.181	4
2019	5	26.4583	26	11	18.2	992.798	343.8	34.66	1.4	54.5	0.2	0.4	0.6	1.8	15.2	8.5	0.27	8.59549	2.9536	5.6419	4
2019	5	26.5	26	12	20.2	991.961	320	46.58	1.3	44.6	0.1	0.1	0.1	2.5	14.3	8.5	0.22	5.89029	2.8528	3.0375	4
2019	5	26.5417	26	13	21.6	991.481	282.6	48.21	1.3	39	0.1	0.1	-0.1	2.7	12	7.4	0.09	4.18491	2.7519	1.433	4
2019	5	26.5833	26	14	22.2	990.951	277.4	50.9	1.1	34.4	0.1	0.1	-0.1	2.6	13.1	7.7	0.05	3.00701	2.651	0.356	4
2019	5	26.625	26	15	22.7	990.712	259.1	48.77	1.3	30.5	0.1	0.1	-0.1	2.6	9.8	4.7	0.04	2.55017	2.5502	0	4
2019	5	26.6667	26	16	22	990.697	243.6	37.91	1.7	27.4	0.1	0.1	0	2.6	8.4	3.6	0.04	2.5521	2.4969	0.0552	4
2019	5	26.7083	26	17	20.4	990.77	252.3	38.25	1.2	29	0.1	0.1	0.4	2.2	7.7	3.6	0.04	3.92452	2.4436	1.4809	4
2019	5	26.75	26	18	17.8	991.425	306.4	50.47	0.3	36.3	0.2	0.1	1.7	0.7	8.2	4	0.18	4.79463	2.3903	2.4043	4
2019	5	26.7917	26	19	16.4	992.062	281.6	50.39	0.3	40.1	0.4	0.7	2.2	0.2	11.1	5.6	0.24	4.84399	2.337	2.5069	4
2019	5	26.8333	26	20	15.7	992.456	251.4	55	0.6	41.9	0.3	0.6	2.1	0.5	13.5	7.5	0.31	5.13918	2.2838	2.8554	4
2019	5	26.875	26	21	14.7	992.47	275.9	39.33	0.7	44.2	0.3	0.3	2	0.5	16.3	10.5	0.28	7.96728	2.2305	5.7368	4
2019	5	26.9167	26	22	11.6	992.367	15.4	61.47	0.4	55.2	0.5	2.2	2.2	0.1	14.8	8.4	0.32	10.5544	2.1772	8.3772	4
2019	5	26.9583	26	23	9.8	991.767	4.6	97.21	0.1	63.9	0.6	4.3	2.1	0.1	21.3	13.2	0.43	12.7892	2.1239	10.6653	4
2019	5	27	27	0	9.7	991.635	184.8	63.67	0.4	65.7	0.4	3.8	2	0.1	21.6	14.1	0.31	14.4191	2.0706	12.3484	4
2019	5	27.0417	27	1	8.8	991.051	157.3	89.59	0.1	67.8	0.3	4.8	1.8	0.1	22.4	14.4	0.4	17.7805	2.0174	15.7631	4
2019	5	27.0833	27	2	7.1	990.622	75	61.83	0.3	76.9	0.35	5.8	-9999	-9999	22.6	15.3	0.48	21.4903	1.9641	19.5262	4
2019	5	27.125	27	3	6.3	990.059	103.4	61.01	0.3	81.1	0.4	6.8	1.7	-0.2	29	20	0.7	25.6434	1.9108	23.7326	4
2019	5	27.1667	27	4	5.3	989.517	59.3	53.66	0.3	83.5	0.4	8.8	1.6	-0.1	27.4	16.1	0.45	29.8739	1.8575	28.0164	4
2019	5	27.2083	27	5	4.9	989.147	81	39.14	0.4	86.5	0.4	6.9	1.3	-0.1	25.9	13.8	0.58	31.7748	1.8042	29.9706	4
2019	5	27.25	27	6	4.2	988.777	97.3	61.31	0.3	86.3	0.3	6.2	1.1	-0.1	28.1	17.2	0.39	30.9947	1.7509	29.2438	4
2019	5	27.2917	27	7	4.2	988.575	29.8	73.12	0.2	85.1	0.4	9.2	1.5	-0.1	24.1	12.8	0.32	24.5797	1.6977	22.882	4
2019	5	27.3333	27	8	7.6	988.938	228.3	83.13	0.2	72.7	0.7	12.8	2.2	-0.1	32.2	15	0.38	13.665	1.6444	12.0207	4
2019	5	27.375	27	9	12.5	988.414	357.9	44.12	1.3	54.5	0.3	3.8	2.2	0.4	28.1	12.1	0.22	7.13871	1.5911	5.5476	4
2019	5	27.4167	27	10	15.5	987.881	337.3	27.45	2.3	43.8	0.1	0.8	0.8	1.5	19.5	8.9	0.11	4.02024	1.5378	2.4824	4
2019	5	27.4583	27	11	17.9	986.942	316.6	40.31	2.3	35.8	0.1	0.2	0.1	2.3	15.1	3.4	0.08	2.87912	1.4845	1.3946	4
2019	5	27.5	27	12	18.6	986.42	312.4	43.88	2.4	34.8	0.1	0.1	0.1	2.4	19.3	0.7	0.06	2.17547	1.4313	0.7442	4
2019	5	27.5417	27	13	14.7	987.813	238.6	40.51	4.4	39	0.1	0.1	0.1	2.5	41.9	-0.8	0.2	1.41569	1.378	0.0377	4
2019	5	27.5833	27	14	13.5	987.721	264.1	46.47	2.6	36.7	0.1	0.1	0.2	2.4	85.1	6.2	0.08	1.3247	1.3247	0	4
2019	5	27.625	27	15	13.5	987.947	273.4	46.92	2.2	37.3	0.1	0.2	0.2	2.3	-9999	-9999	0.04	1.48149	1.3559	0.1256	1
2019	5	27.6667	27	16	13.6	988.475	265.3	46.39	2.8	38.8	0.1	0.2	0.2	2.3	12.6	-1.8	0.06	1.68764	1.3871	0.3005	1
2019	5	27.7083	27	17	12.5	988.81	261.2	41.63	2.3	42.1	0.1	0.1	0.4	2.1	20.7	6.2	0.04	1.88605	1.4183	0.4677	1
2019	5	27.75	27	18	12.2	989.794	253	37.06	1.8	39.9	0.1	0.1	0.6	1.8	7.3	1.5	0.06	2.08058	1.4495	0.631	1
2019	5	27.7917	27	19	12.1	990.625	251.9	38.77	1.8	39.3	0.1	0.1	0.5	2	7.8	1.5	0.06	2.09703	1.4807	0.6163	1
2019	5	27.8333	27	20	11.9	991.342	258.3	42.81	1.5	39.5	0.1	0	0.3	2.1	9.4	3.4	0.06	2.06315	1.5119	0.5512	1
2019	5	27.875	27	21	11.7	991.763	267.4	41.25	1.4	39.2	0.1	0	0.2	2.2	9.8	3.1	0.06	1.93054	1.5432	0.3874	1
2019	5	27.9167	27	22	11.8	992.062	250.2	38.65	1.9	39	0.1	0	0.2	2.3	12.9	6	0.06	2.18122	1.5744	0.6069	1
2019	5	27.9583	27	23	11.2	992.54	289.7	48.14	0.8	41	0.1	0	0.2	2.2	11.8	4.4	0.06	2.37769	1.6056	0.7721	1
2019	5	28	28	0	11.1	992.432	303.5	50.24	1.1	41.8	0.1	0	0	2.3	6	0.3	0.06	2.57125	1.6368	0.9345	1
2019	5	28.0417	28	1	10.7	992.284	328.3	41.37	1.2	43.2	0	0	0	2.3	6.3	1.2	0.06	2.59448	1.668	0.9265	1
2019	5	28.0833	28	2	10.6	992.223	290.3	52.05	0.9	44.6	0.05	0	-9999	-9999	13.9	4.6	0.07	2.51801	1.6992	0.8188	1
2019	5	28.125	28	3	10.5	991.999	262	48.44	1.1	45.9	0.1	0	0.2	2.1	7.6	2.4	0.05	2.73093	1.7304	1.0005	1
2019	5	28.1667	28	4	10	991.683	258.8	47.13	0.8	48.5	0	0	0.3	2	5.7	2	0.05	3.50909	1.7616	1.7475	1
2019	5	28.2083	28	5	9	991.613	330.7	55.25	0.5	52.1	0.1	0	0.7	1.5	7.8	3.8	0.06	4.50405	1.7928	2.7112	1
2019	5	28.25	28	6	8.3	991.911	339.4	34.24	0.6	53.8	0.1	0.1	1.5	0.8	8.6	4.2	0.08	4.87958	1.824	3.0556	1
2019	5	28.2917	28	7	8.1	992.266	357	47.69	0.8	54.4	0.3	1.5	2.4	0.1	14.6	5.7	0.11	5.40028	1.8552	3.5451	1
2019	5	28.3333	28	8	7.6	992.591	7.1	39.48	1	58.1	0.4	5.3	2.8	0	18.7	9.7	0.19	4.80794	1.8864	2.9215	1
2019	5	28.375	28	9	9.9	992.532	345.1	25.8	1.3	53.1	0.4	6.4	2.9	0.2	22.9	10.3	0.24	4.28819	1.9176	2.3705	1
2019	5	28.4167	28	10	12.2	992.337	282.2	47.62	1.1	43.8	0.1	1.4	1.2	1.3	20.6	8.1	0.12	3.38613	1.9489	1.4373	1
2019	5	28.4583	28	11	14.4	991.698	263.6	50.27	1.4	37.5	0.1	0.4	0.6	2.1	14.3	5.3	0.1	2.72991	1.9801	0.7499	1
2019	5	28.5	28	12	16.3	990.97	303.6	41.24	1.8	32.5	0.1	0.4	0.5	2.2	14.4	7	0.08	2.52472	2.0113	0.5135	1
2019	5	28.5417	28	13	17.7	990.061	312.6	45.68	1.6	30.6	0.1	0.2	0.3	2.4	10.7	2.8	0.08	2.20435	2.0425	0.1619	1
2019	5	28.5833	28	14	18.4	989.405	301.6	46.56	1.4	29.9	0.1	0.2	0.3	2.3	12.6	4.3	0.08	2.07368	2.0737	0	1
2019	5	28.625	28	15	18.8	989.128	264.8	43.51	1.6	29.8	0.1	0.2	0.4	2.2	10.9	3	0.08	2.2237	2.0649	0.1588	1
2019	5	28.6667	28	16	17.8	989.253	245.8	37.11	1.9	31.9	0.1	0.3	0.7	1.9	12.4	5.3	0.09	2.41436	2.0562	0.3582	1
2019	5	28.7083	28	17	15.6	989.764	257.3	44.83	1.5	37	0.1	0.2	1.1	1.5	14.6	3.6	0.09	2.7502	2.0474	0.7028	1
2019	5	28.75	28	18	14	990.336	304.9	42.97	1.7	41.5	0.1	0.1	0.8	1.7	13.5	4.1	0.1	2.84892	2.0387	0.8103	1
2019	5	28.7917	28	19	12.8	990.725	324.5	29.46	1.8	46.4	0.1	0	0.7	1.7	10.1	3.7	0.08	3.1596	2.0299	1.1297	1
2019	5	28.8333	28	20	12.3	990.648	323.8	28.95	1.9	48.6	0.1	0	0.8	1.7	9	4.2	0.16	3.19927	2.0211	1.1781	1
2019	5	28.875	28	21	12	990.646	320.4	27.4	1.9	50	0.1	0	0.8	1.6	10.5	5.6	0.21	3.25056	2.0124	1.2382	1
2019	5	28.9167	28	22	11.7	990.383	326.6	28.62	1.5	50.5	0.1	0	0.8	1.7	10.9	6.3	0.18	3.04924	2.0036	1.0456	1
2019	5	28.9583	28	23	12	989.738	337.4	23.22	2	49.8	0.1	0	0.6	1.9	8.6	4.6	0.08	2.98052	1.9949	0.9857	1
2019	5	29	29	0	11.8	988.859	359.3	14.45	2.2	51.4	0.1	0	0.6	1.8	7.2	3.2	0.09	3.22441	1.9861	1.2383	1
2019	5	29.0417	29	1	11.8	987.938	2	13.21	1.7	51.6	0.1	0	0.5	1.9	8.8	3.7	0.16	3.18085	1.9774	1.2035	1
2019	5	29.0833	29	2	12.5	987.461	4.6	16.57	1.9	49.1	0.1	0	-9999	-9999	7.9	3.3	0.13	3.13826	1.9686	1.1697	1
2019	5	29.125	29	3	13.1	986.822	352.1	19.03	2.3	48.6	0.1	0	0.2	2.1	5.2	1	0.1	3.21762	1.9598	1.2578	1
2019	5	29.1667	29	4	13.1	986.478	352.8	18.02	2.1	48.5	0	0	0.2	2.2	6.4	1.1	0.09	3.32892	1.9511	1.3778	1
2019	5	29.2083	29	5	13.2	986.291	357.2	17.87	2.2	48.7	0	0	0.3	2	5.4	-0.4	0.07	3.45377	1.9423	1.5114	1
2019	5	29.25	29	6	13.6	985.994	347.8	27.88	2.2	48.6	0.1	0	0.5	1.9	5.2	0.1	0.07	3.6483	1.9336	1.7147	1
2019	5	29.2917	29	7	13.5	985.997	353.5	23.47	1.9	49.8	0.1	0	0.9	1.4	5.7	0.2	0.07	3.72572	1.9248	1.8009	1
2019	5	29.3333	29	8	14.4	986.099	338.7	27.59	2.7	48.1	0.1	0.1	0.8	1.7	9.2	2	0.09	3.39664	1.9161	1.4806	1
2019	5	29.375	29	9	15.8	985.829	335.9	24.39	3.7	46	0.1	0.2	0.5	1.9	11	0.7	0.08	3.26404	1.9073	1.3567	1
2019	5	29.4167	29	10	17	985.491	342.4	25.18	3.6	44.5	0	0.2	0.3	2	12.2	1.9	0.06	3.11885	1.8985	1.2203	1
2019	5	29.4583	29	11	18.3	985.213	333	31.61	2.9	40.9	0.1	0.2	0.3	2.1	14.6	1.7	0.05	2.95818	1.8898	1.0684	1
2019	5	29.5	29	12	18.4	984.902	333.3	33.22	3.2	38.8	0	0.1	0.2	2.3	16.8	2.4	0.04	2.47134	1.881	0.5903	1
2019	5	29.5417	29	13	18.7	984.608	313.9	38.97	2.8	35.9	0	0.1	0.2	2.2	14	2.8	-9999	2.02998	1.8723	0.1577	1
2019	5	29.5833	29	14	18.3	984.208	317	33.2	3.9	33	0	0.1	0.1	2.5	25.9	6.4	0.08	1.86351	1.8635	0	1
2019	5	29.625	29	15	18.5	984.107	315.1	37.55	3.2	30.9	0.1	0.1	0.2	2.4	30.1	2.3	0.07	2.24484	1.8623	0.3825	1
2019	5	29.6667	29	16	18.1	984.646	302.9	38.67	2.5	31.2	0.1	0.1	0.4	2.2	17.2	0.7	0.06	2.58165	1.8612	0.7205	1
2019	5	29.7083	29	17	17.1	985.656	288	47.65	1.9	35.9	0.1	0.1	0.6	2	13.8	2.5	0.06	2.76941	1.86	0.9094	1
2019	5	29.75	29	18	15.6	986.726	303.2	39.21	2.2	41.8	0.1	0	0.5	2	13.9	3.8	0.05	2.64068	1.8588	0.7819	1
2019	5	29.7917	29	19	14.4	988.118	243.5	39.67	1.8	45.5	0.1	0	0.6	2	10	3.6	0.03	2.51195	1.8576	0.6543	1
2019	5	29.8333	29	20	13.4	988.857	296.9	45.12	1.1	46.1	0.1	0	0.6	2	4.6	1.2	0.03	2.17512	1.8565	0.3187	1
2019	5	29.875	29	21	12.5	989.409	309.6	39.72	1	42.7	0.1	0	0.5	2.2	2.2	-0.3	0.03	2.28255	1.8553	0.4273	1
2019	5	29.9167	29	22	11.5	989.852	322.2	36.02	1.2	44.9	0.1	0	0.9	1.8	2.2	-0.7	0.07	2.29125	1.8541	0.4372	1
2019	5	29.9583	29	23	11.6	990.378	263.8	46.43	1.2	44.5	0.1	0	0.5	2.1	5	2.1	0.05	2.1751	1.8529	0.3222	1
2019	5	30	30	0	11.2	990.73	255.3	40.63	1.4	43	0.1	0	0.2	2.4	5.2	1.9	0.04	2.0454	1.8517	0.1937	1
2019	5	30.0417	30	1	10.8	990.624	250.9	41.44	1.7	40.3	0	0	0.1	2.4	6.6	2.5	0.05	2.51675	1.8506	0.6662	1
2019	5	30.0833	30	2	9.7	990.463	317	52.89	0.9	43.3	0.05	0	-9999	-9999	10.5	5.9	0.05	3.26781	1.8494	1.4184	1
2019	5	30.125	30	3	8.2	990.826	332.9	66.81	0.5	47.5	0.1	0	0.5	1.8	6.4	2.7	0.06	3.26102	1.8482	1.4128	1
2019	5	30.1667	30	4	8.4	991.732	235.9	67.92	0.6	47.4	0.1	0.2	0.9	1.6	6.8	2.5	0.07	2.69578	1.847	0.8487	1
2019	5	30.2083	30	5	9	992.24	247	39.55	1.5	45.7	0.1	0	0.3	2.2	7.8	3.5	0.04	2.45768	1.8459	0.6118	1
2019	5	30.25	30	6	8.8	992.975	248.2	45.16	1.2	46.3	0.1	0	0.6	1.9	4.4	0.8	0.04	2.87579	1.8447	1.0311	1
2019	5	30.2917	30	7	7.8	993.534	270.8	45.55	0.7	50.3	0.1	0.1	1.6	1	6.8	2.2	0.07	3.38295	1.8435	1.5394	1
2019	5	30.3333	30	8	7.6	994.123	281.4	44.95	0.8	50.9	0.2	1.4	2.4	0.3	11.4	4.7	0.09	3.45263	1.8423	1.6103	1
2019	5	30.375	30	9	9.5	994.615	260.2	47.89	1.1	45.3	0.2	1.3	1.7	1	10.1	3.1	0.08	2.95127	1.8412	1.1101	1
2019	5	30.4167	30	10	11.5	994.967	240.7	36	2.3	39.6	0.1	0.4	0.6	2	10.9	3.9	0.05	2.51766	1.84	0.6777	1
2019	5	30.4583	30	11	13	995.036	242	37.04	2.5	35.7	0.1	0.3	0.4	2.2	7.1	0.8	0.04	2.14115	1.8388	0.3023	1
2019	5	30.5	30	12	14.3	994.816	237.8	33.9	2.6	32.4	0.1	0.3	0.4	2.3	8.2	1.4	0.04	2.04533	1.8376	0.2077	1
2019	5	30.5417	30	13	15.2	994.396	239.5	41.86	2	29.8	0.1	0.2	0.3	2.4	6.7	1.3	0.04	1.85272	1.8365	0.0163	1
2019	5	30.5833	30	14	15.6	994.357	243.1	38.44	2	29.1	0.1	0.2	0.3	2.4	7.2	2.6	0.04	1.83529	1.8353	0	1
2019	5	30.625	30	15	15.5	994.544	245.1	44.41	1.7	30.1	0.1	0.2	0.5	2.3	8.1	3.5	0.04	2.06273	1.8587	0.2041	2
2019	5	30.6667	30	16	15.1	995.215	249.6	41.09	1.8	31.2	0.1	0.2	0.6	2.1	9.7	4.9	0.04	2.35889	1.882	0.4768	2
2019	5	30.7083	30	17	13.6	996.035	249.7	37.98	1.9	33.8	0.1	0.2	0.9	1.7	6.4	1	0.05	2.78281	1.9054	0.8774	2
2019	5	30.75	30	18	11.8	996.912	240.1	34.56	2.2	38.4	0.1	0.1	1	1.6	9	3	0.06	3.2348	1.9288	1.306	2
2019	5	30.7917	30	19	10.5	997.722	238	33.06	1.8	42.7	0.1	0.1	1.1	1.3	6.8	1.7	0.06	3.71969	1.9522	1.7675	2
2019	5	30.8333	30	20	9.2	998.178	266.2	50.18	0.8	47.2	0.2	0.1	1.6	0.7	8.8	4.2	0.1	4.0807	1.9756	2.1051	2
2019	5	30.875	30	21	8.7	998.425	255.1	38.52	1.1	50.1	0.2	0.2	1.5	1	13	7.5	0.09	4.25878	1.9989	2.2599	2
2019	5	30.9167	30	22	8.5	998.617	263	39.94	1.1	52.3	0.1	0	1	1.3	9.7	6.1	0.07	4.35943	2.0223	2.3371	2
2019	5	30.9583	30	23	8.1	998.581	247.5	34.92	1.1	53.9	0.1	0	0.9	1.3	9.2	5.9	0.06	4.25296	2.0457	2.2073	2
2019	5	31	31	0	8	998.522	242	32.54	1.3	54.2	0.1	0	0.8	1.5	7	3.9	0.05	4.46589	2.0691	2.3968	2
2019	5	31.0417	31	1	7.7	998.32	271.3	49.88	0.7	55.8	0.1	0	0.4	1.9	4.1	1.7	0.05	5.16178	2.0924	3.0693	2
2019	5	31.0833	31	2	7.1	998.119	279.8	70.41	0.3	57.7	0.15	0	-9999	-9999	5.9	3.8	0.06	5.50827	2.1158	3.3925	2
2019	5	31.125	31	3	6.9	997.844	250.9	44.05	0.8	60.1	0.2	0	0.8	1.1	7.1	4.9	0.07	6.11221	2.1392	3.973	2
2019	5	31.1667	31	4	6.8	997.464	271.3	52.4	0.5	62.5	0.1	0	1.2	0.9	8	4.4	0.08	6.88069	2.1626	4.7181	2
2019	5	31.2083	31	5	6.1	997.604	0.5	19.82	0.9	66.4	0.1	0.2	1.5	0.6	6.1	2.3	0.1	7.60271	2.1859	5.4168	2
2019	5	31.25	31	6	5.8	998.043	344.2	24.98	0.9	65.7	0.2	0.8	2.3	0	13.6	7.9	0.2	8.94514	2.2093	6.7358	2
2019	5	31.2917	31	7	5.1	998.562	18.2	46.4	0.5	67.2	0.5	5.5	2.8	-0.1	15.1	10.9	0.43	9.58683	2.2327	7.3541	2
2019	5	31.3333	31	8	5.7	999.086	301.2	48.93	0.6	67.2	0.7	13	3.2	0	31.8	18.4	0.45	8.62283	2.2561	6.3667	2
2019	5	31.375	31	9	8.6	999.215	272.6	44.71	0.6	57.6	0.6	8.2	2.8	0.1	29.4	17.9	0.37	6.92905	2.2795	4.6496	2
2019	5	31.4167	31	10	11.2	999.202	253.6	37.13	1.2	52	0.3	3.4	2	0.6	21.6	12.2	0.22	5.7105	2.3028	3.4077	2
2019	5	31.4583	31	11	14.5	998.84	248.9	38.48	1.5	45.8	0.1	0.9	1	1.4	14.7	6.6	0.1	4.68552	2.3262	2.3593	2
2019	5	31.5	31	12	17	998.226	238	43.31	1.6	40.5	0.2	0.5	0.6	1.8	14.4	4.9	0.08	3.66539	2.3496	1.3158	2
2019	5	31.5417	31	13	18.9	997.818	253.3	48.14	1.4	36.4	0.1	0.2	0.3	2.1	10.4	2.6	0.05	2.92399	2.373	0.551	2
2019	5	31.5833	31	14	19.5	997.598	223.7	50.11	1.4	35.3	0.1	0.2	0.4	2.2	9	3.4	0.05	2.58427	2.3963	0.1879	2
2019	5	31.625	31	15	19.8	997.618	212.2	54.72	1.1	35	0.1	0.3	0.5	2.1	8.6	4.1	0.06	2.41972	2.4197	0	2
2019	5	31.6667	31	16	19.4	997.91	186.7	42.75	1.2	35.2	0.1	0.2	0.5	2.1	9.6	4.5	0.05	2.77299	2.3822	0.3908	2
2019	5	31.7083	31	17	18.2	998.346	236.9	48.23	0.9	37.7	0.2	0.3	1.2	1.3	11.2	6	0.12	3.58405	2.3446	1.2394	2
2019	5	31.75	31	18	16.5	999.15	215.8	58.55	0.5	42	0.4	2.2	2.6	0	11.6	6.2	0.2	4.85099	2.3071	2.5439	2
2019	5	31.7917	31	19	14.7	1000.1	237.3	42.21	1.5	46.9	0.2	0.5	1.9	0.3	13.6	7.6	0.11	5.63108	2.2695	3.3615	2
2019	5	31.8333	31	20	13.1	1000.5	235.6	33.23	1.9	52.3	0.1	0.2	1.1	0.8	8	3.3	0.09	6.14985	2.232	3.9178	2
2019	5	31.875	31	21	12.7	1000.99	234.5	34.01	1.8	53.6	0.1	0.1	0.7	1.1	7.5	3.8	0.1	6.25631	2.1945	4.0618	2
2019	5	31.9167	31	22	12.6	1001.41	234.8	37.1	1.4	54.4	0.1	0	0.6	1.1	4.6	1.6	0.07	6.52053	2.1569	4.3636	2
2019	5	31.9583	31	23	12.5	1001.57	239.8	35.53	1.2	55.6	0.1	0	0.5	1.1	4.4	2	0.06	6.78766	2.1194	4.6683	2
