# Supplementary material for: Portable two-filter dual-flow-loop &lt;sup&gt;222&lt;/sup&gt;Rn detector: stand-alone monitor and calibration transfer device
Source: Copernicus journal article supplement (doi:10.5194/adgeo-57-63-2022), 2022-05-18
Supplement: Supplementary file 2 [file adgeo-57-63-2022-supplement.zip]

Archive with 2 entries (2 files):
- Chambers_etal_ADGEO_2022_3_Source_Data.xlsx
- adgeo-57-63-2022-supplement-title-page.pdf
